# Supplementary material for: Local miRNA-Dependent Translational Control of GABAAR Synthesis during Inhibitory Long-Term Potentiation
Source: PubMed Central journal article supplement — Cell Rep. Author manuscript; Available in PMC 2020 Sep 12. (PMC7486624; doi:10.1016/j.celrep.2020.107785), 2020-06-23
Supplement: NIHMS1607437-supplement-1.pdf [file NIHMS1607437-supplement-1.pdf]

**Cell Reports, Volume 31**

**Supplemental Information**

**Local miRNA-Dependent Translational  
Control of GABA<sub>A</sub>R Synthesis  
during Inhibitory Long-Term Potentiation**

**Dipen Rajgor, Alicia M. Purkey, Jennifer L. Sanderson, Theresa M. Welle, Joshua D. Garcia, Mark L. Dell'Acqua, and Katharine R. Smith**

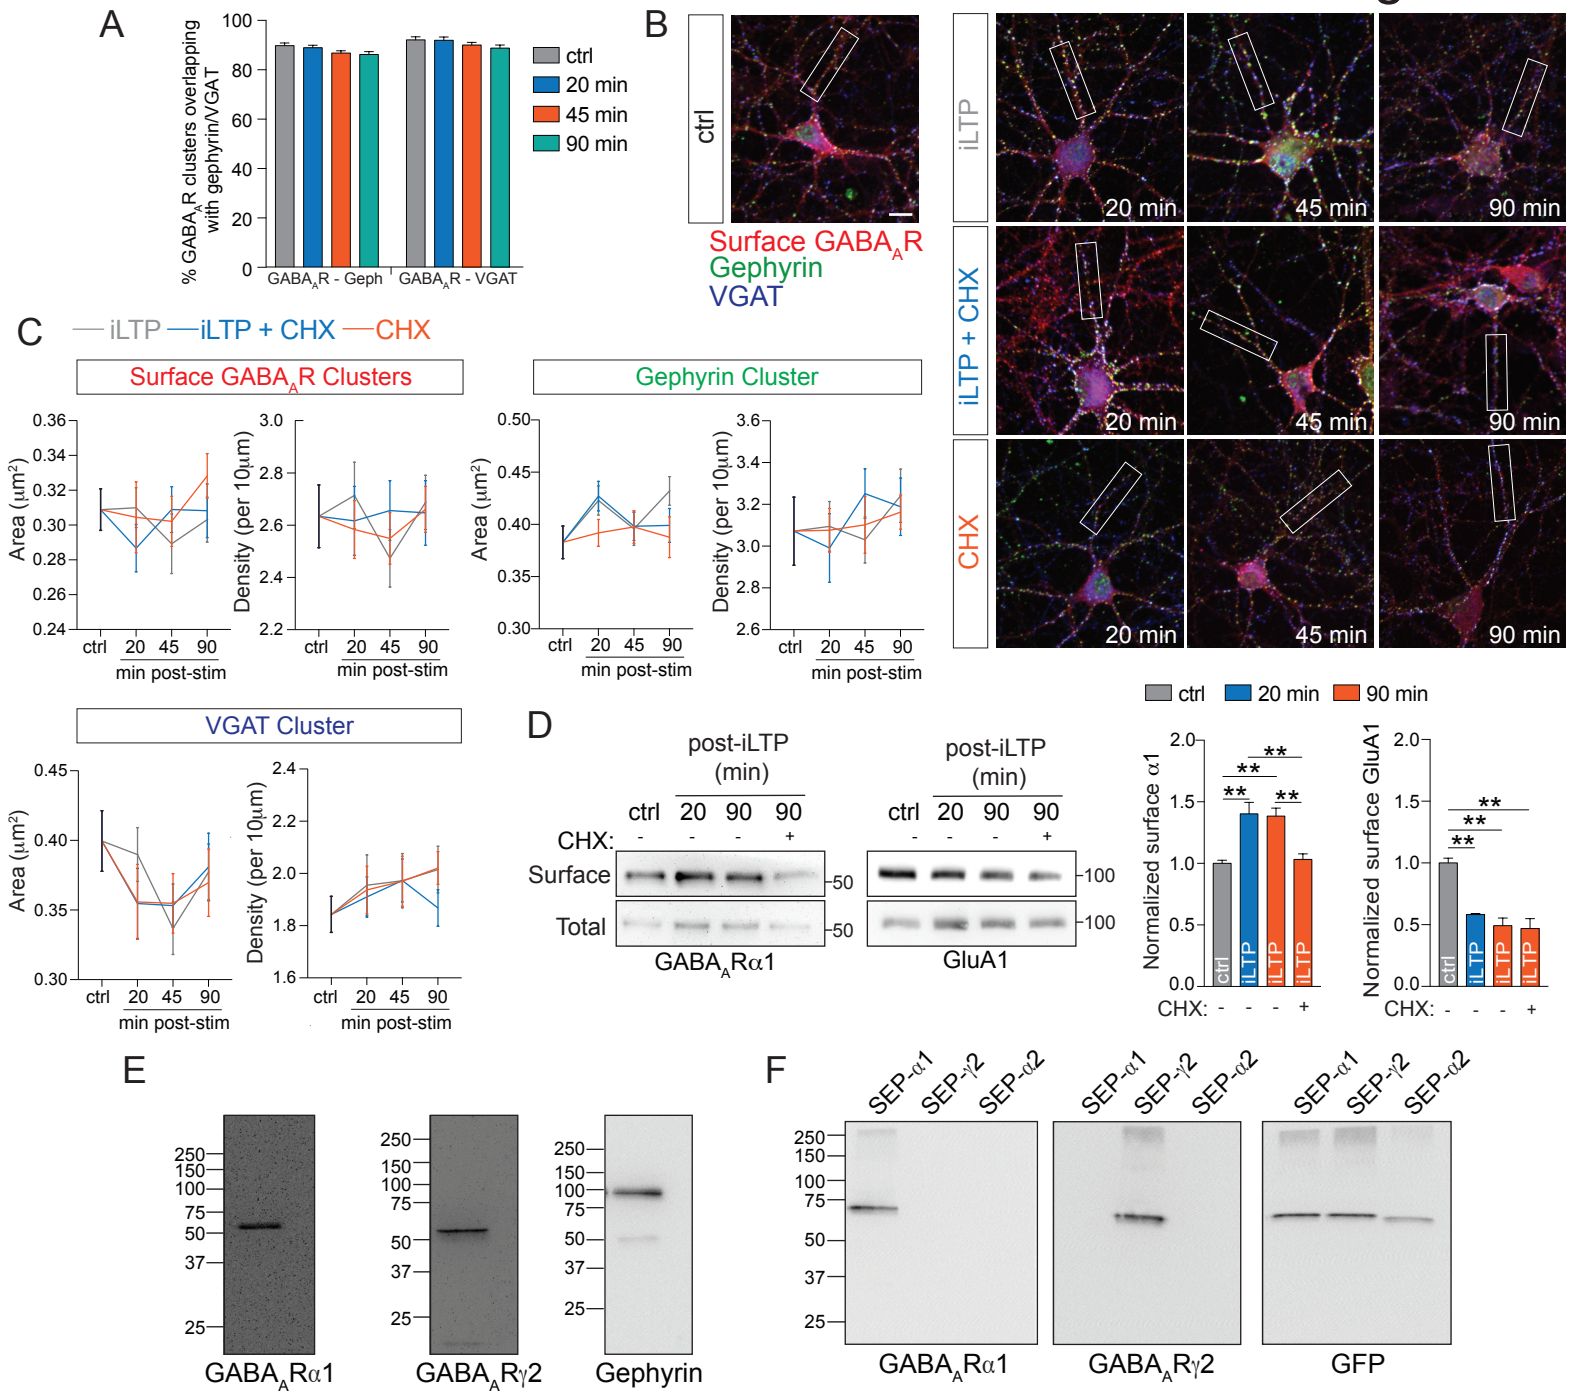

**Figure S1, related to Figure 1. Protein synthesis is required to maintain dendritic surface GABA<sub>A</sub>Rs following iLTP.** **A)** Percentage dendritic surface GABA<sub>A</sub>R<sub>γ2</sub> overlapping with gephyrin or VGAT in resting neurons and post-iLTP induction. Quantification based on images from Figure 1A, n=16 cells per condition from 3 independent experiments. **B)** Representative soma images labeled with surface GABA<sub>A</sub>R<sub>γ2</sub> and intracellular gephyrin and VGAT. Neurons were fixed at 20, 45 and 90 min post-treatment: iLTP induction, iLTP induction in the presence of cycloheximide (CHX), or CHX alone. Dendritic segments shown in Figure 1A are from the boxed white areas shown. Scale bar = 10 μm. **C)** Quantification of somatic surface GABA<sub>A</sub>R<sub>γ2</sub>, gephyrin and VGAT cluster area and density from B), n=15-16 cells per condition from 3 independent experiments. **D)** WBs and quantification of GABA<sub>A</sub>R<sub>α1</sub> and GluA1 from surface biotinylation assays following iLTP in the presence or absence of CHX. Surface levels were normalized to total levels, n=5. **E)** Full-length WBs showing anti-GABA<sub>A</sub>R<sub>α1</sub> and anti-GABA<sub>A</sub>R<sub>γ2</sub> recognize a single band at ~50 kDa from hippocampal neuronal lysates and anti-gephyrin recognizes a major band at ~100 kDa. Predicted molecular weights for α<sub>1</sub>, γ<sub>2</sub> and gephyrin are 52 kDa, 54 kDa and 84.4 kDa respectively. Gephyrin runs higher due to post-translational modifications. **F)** Lysates from HEK293T cells expressing SEP-tagged GABA<sub>A</sub>R<sub>α1</sub>, GABA<sub>A</sub>R<sub>γ2</sub> or GABA<sub>A</sub>R<sub>α2</sub> were probed with anti-GABA<sub>A</sub>R<sub>α1</sub>, anti-GABA<sub>A</sub>R<sub>γ2</sub> and anti-GFP antibodies. Anti-GABA<sub>A</sub>R<sub>α1</sub> only detects GABA<sub>A</sub>R<sub>α1</sub>. Anti-GABA<sub>A</sub>R<sub>γ2</sub> only detects GABA<sub>A</sub>R<sub>γ2</sub>. Anti-GFP detects all three subunits.

All values represent mean ± SEM. \*\*p < 0.01, by one-way ANOVA, Bonferroni post hoc test (A,D) or two-way ANOVA, Bonferroni post hoc test (C).

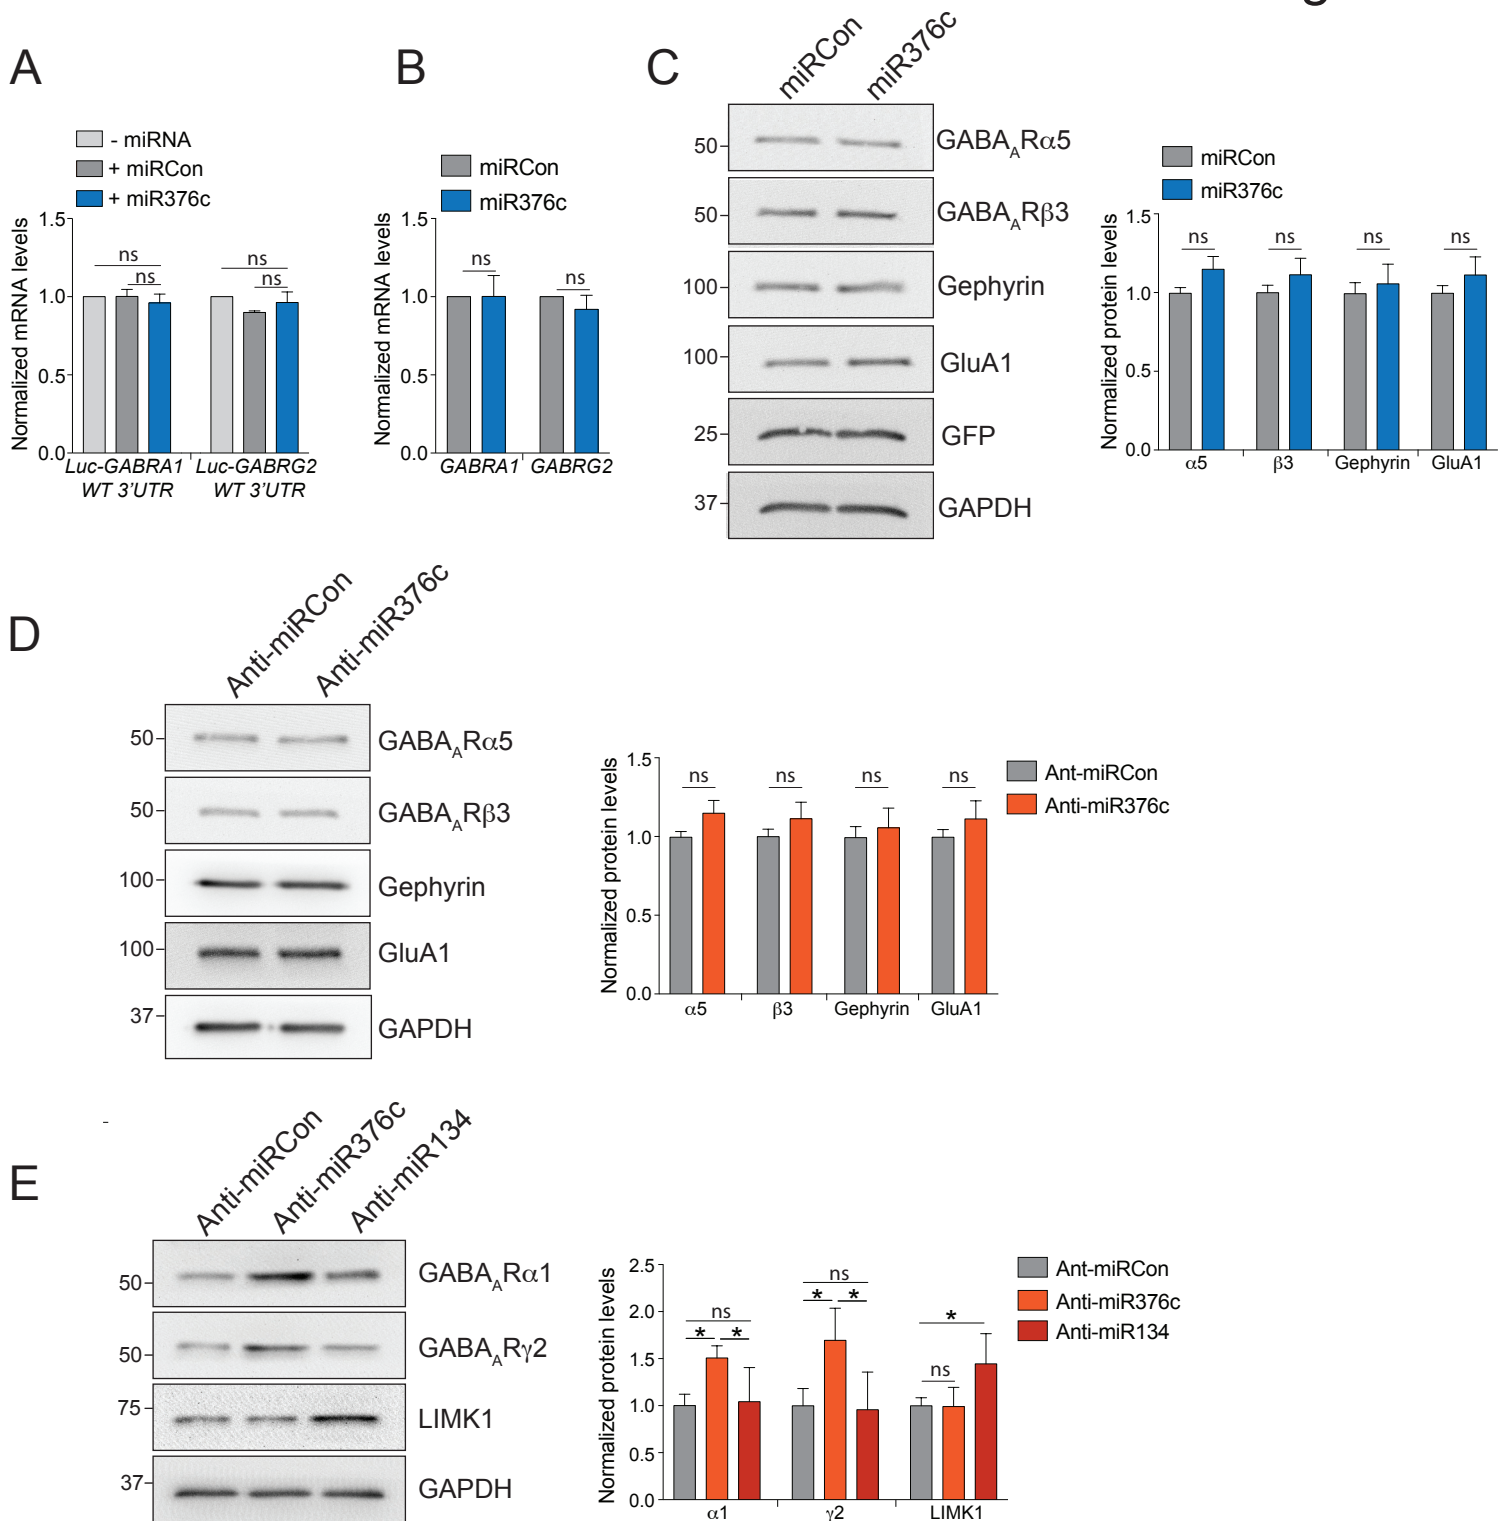

**Figure S2, related to Figure 2. miR376c specifically regulates translational repression of *GABRA1* and *GABRG2*.** **A)** qRT-PCR measuring mRNA levels of Luc-*GABRA1*<sup>WT</sup> and Luc-*GABRG2*<sup>WT</sup> from HEK-293T cells. All readings were normalized to Renilla levels, n=3. **B)** miR376c overexpression does not change *GABRA1* and *GABRG2* levels in hippocampal neurons. mRNA levels were normalized to snRNA U6, n=3. **C)** WBs showing miR376c overexpression does not change protein levels of GABA<sub>A</sub>Rα5, GABA<sub>A</sub>Rβ3, Gephyrin or GluA1 in hippocampal neurons. miRNA overexpression constructs contain a GFP reporter, which shows equal expression of miRCon and miR376c. GFP and GAPDH blots are the same blots as those used in Figure 2E. Protein levels were normalized to GAPDH, n=6. **D)** WBs showing that anti-miR376c does not change protein levels of GABA<sub>A</sub>Rα5, GABA<sub>A</sub>Rβ3, Gephyrin or GluA1 in hippocampal neurons. GAPDH blot is the same as used in Figure 2F. Protein levels were normalized to GAPDH. N=5. **E)** WBs showing that anti-miR134 does not change protein levels of GABA<sub>A</sub>Rα1 and GABA<sub>A</sub>Rγ2, and anti-miR376c does not change protein levels of LIMK1, n=4.

\*p<0.05, by one-way ANOVA, Bonferroni post hoc test. All values represent mean ± SEM. \*p < 0.05 by T-test (B,C,D) or one-way ANOVA, Bonferroni post hoc test (A,E).

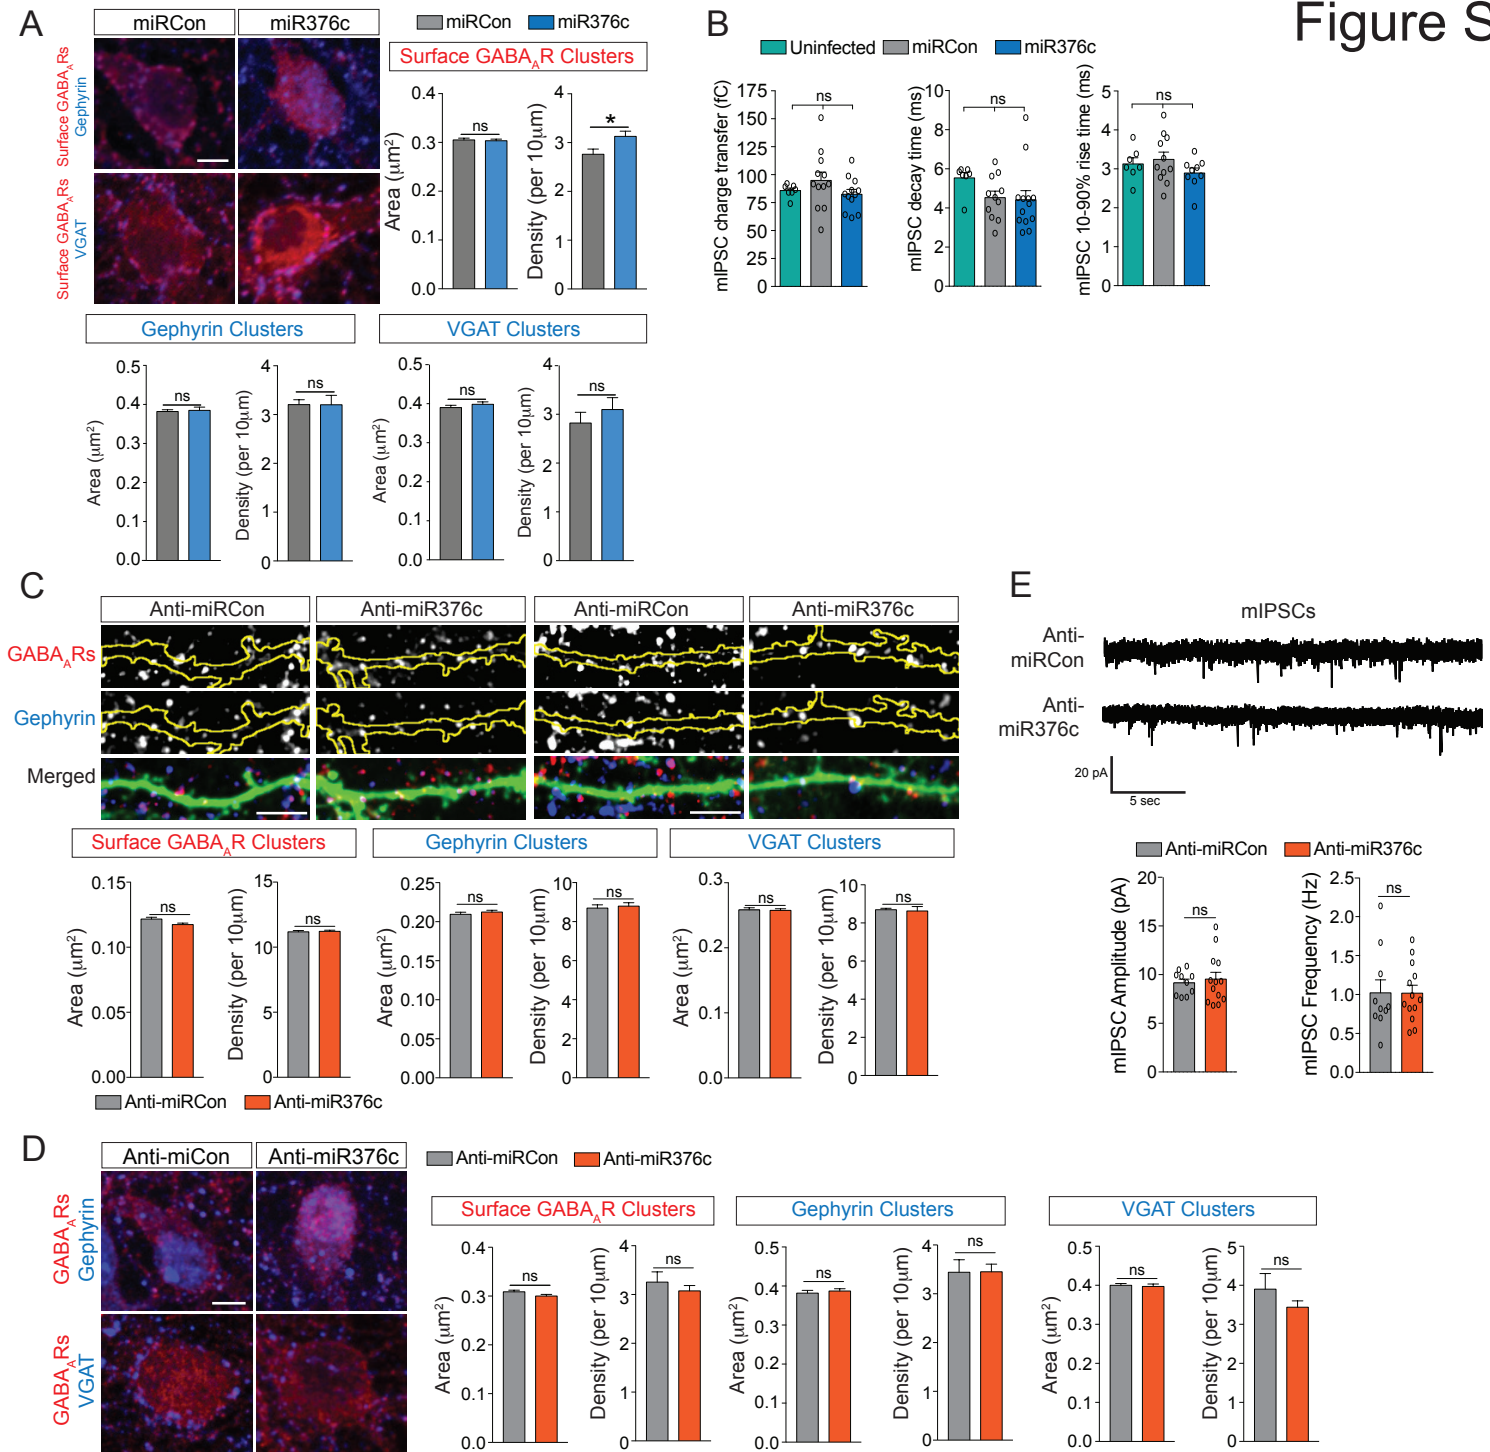

**Figure S3, related to Figure 3. miR376c does not influence clustering of somatic GABA<sub>A</sub>Rs.** **A)** Representative soma images from neurons expressing miRCon or miR376c labeled with surface GABA<sub>A</sub>R<sub>2</sub> and gephyrin or GABA<sub>A</sub>R<sub>2</sub> and VGAT. GFP is not shown to aid visualization of somatic clusters. Graphs show quantification of GABA<sub>A</sub>R<sub>2</sub>, gephyrin and VGAT cluster area and density,  $n=7-18$  neurons per condition from 3 independent experiments. Scale bar=5 $\mu$ m. **B)** Quantification of mIPSC charge transfer, decay time and 10-90% rise time from uninfected neurons or neurons overexpressing miRCon or miR376c,  $n=7-12$  cells from 3 independent experiments. **C)** Representative dendritic images from neurons transfected with anti-miRCon or anti-miR376c labeled with surface GABA<sub>A</sub>R<sub>2</sub> and intracellular gephyrin or GABA<sub>A</sub>R<sub>2</sub> and VGAT. Yellow outlines are constructed from GFP fill. Graphs show quantification of GABA<sub>A</sub>R<sub>2</sub>, gephyrin and VGAT cluster area and density,  $n=9-18$  neurons per condition from 3 independent experiments. Scale bar = 5 $\mu$ m. **D)** Representative soma images from neurons expressing anti-miRCon or anti-miR376c labeled with surface GABA<sub>A</sub>R<sub>2</sub> and intracellular gephyrin or GABA<sub>A</sub>R<sub>2</sub> and VGAT. GFP is not shown to aid visualization of somatic clusters. Graphs show quantification of GABA<sub>A</sub>R<sub>2</sub>, gephyrin and VGAT cluster area and density,  $n=9-18$  neurons per condition from 3 independent experiments. Scale bar=5 $\mu$ m. **E)** Representative mIPSC traces from neurons expressing anti-miRCon or anti-miR376c. Graphs show quantified mIPSC amplitude and frequency,  $n=10-13$  cells from 3 independent experiments. All values represent mean  $\pm$  SEM. Statistical significance determined by t-test (A,C,D,E) or one-way ANOVA, Bonferoni *post hoc* test (B).

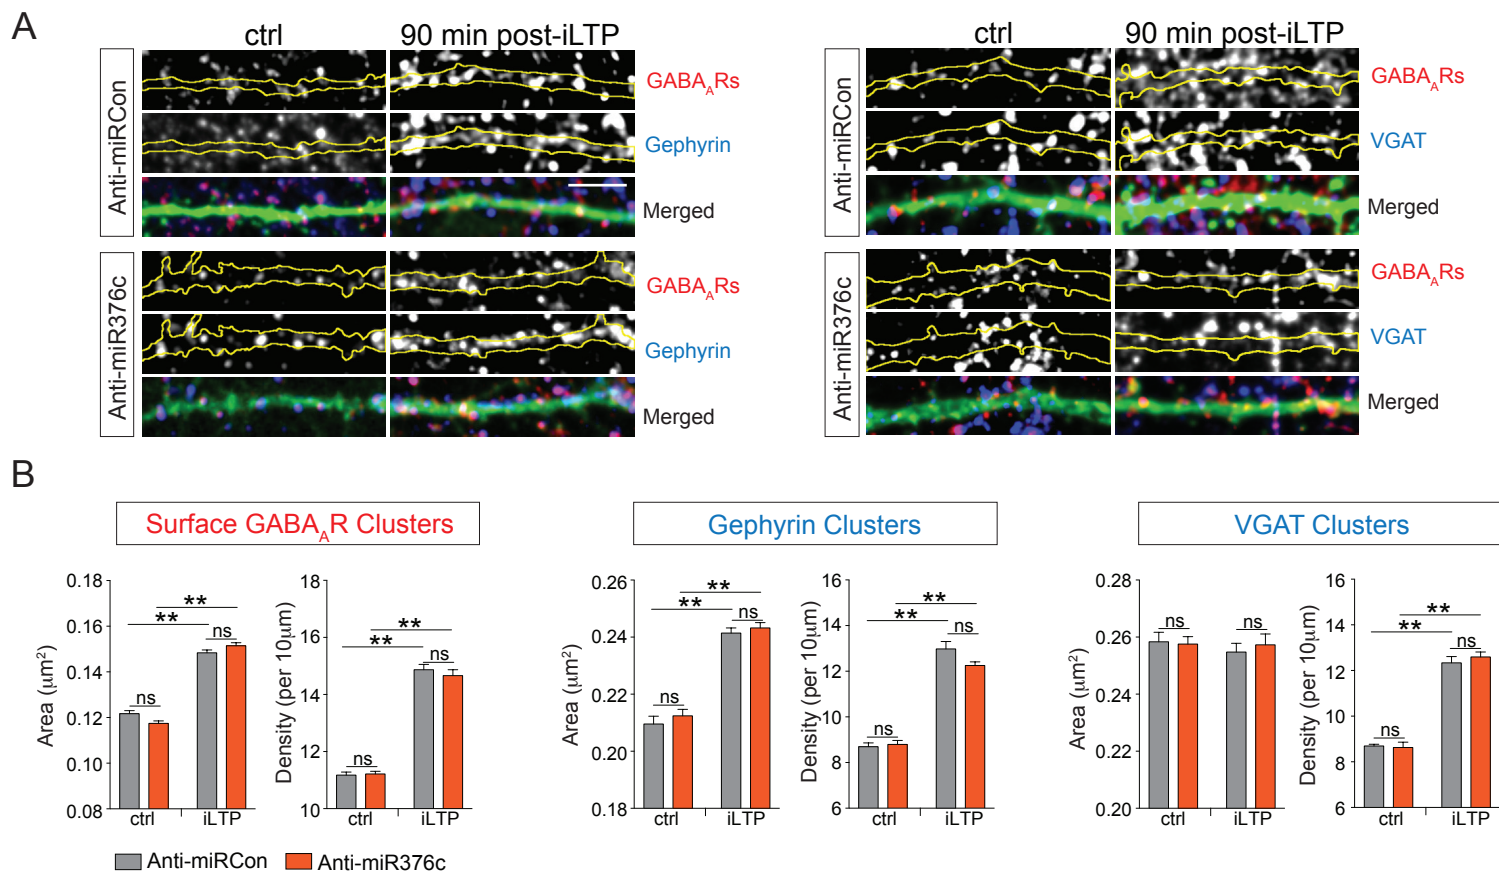

**Figure S4, related to Figure 4. miR376c inhibition does not occlude the upregulation of synaptic GABA<sub>A</sub>Rs following iLTP stimulation.**

**A)** Representative dendritic images from resting and iLTP induced (90 min) neurons expressing anti-miRCon or anti-miR376c, labeled with surface GABA<sub>A</sub>R $\gamma$ 2 and intracellular gephyrin or GABA<sub>A</sub>R $\gamma$ 2 and VGAT. Yellow outlines are constructed from GFP fill. Scale bar = 5µm.

**B)** Graphs show quantification of GABA<sub>A</sub>R $\gamma$ 2, gephyrin and VGAT cluster area and density. n=9-18 neurons per condition from 3 independent experiments. All values represent mean  $\pm$  SEM. \*\*p < 0.01, by two-way ANOVA, Bonferroni *post hoc* test.

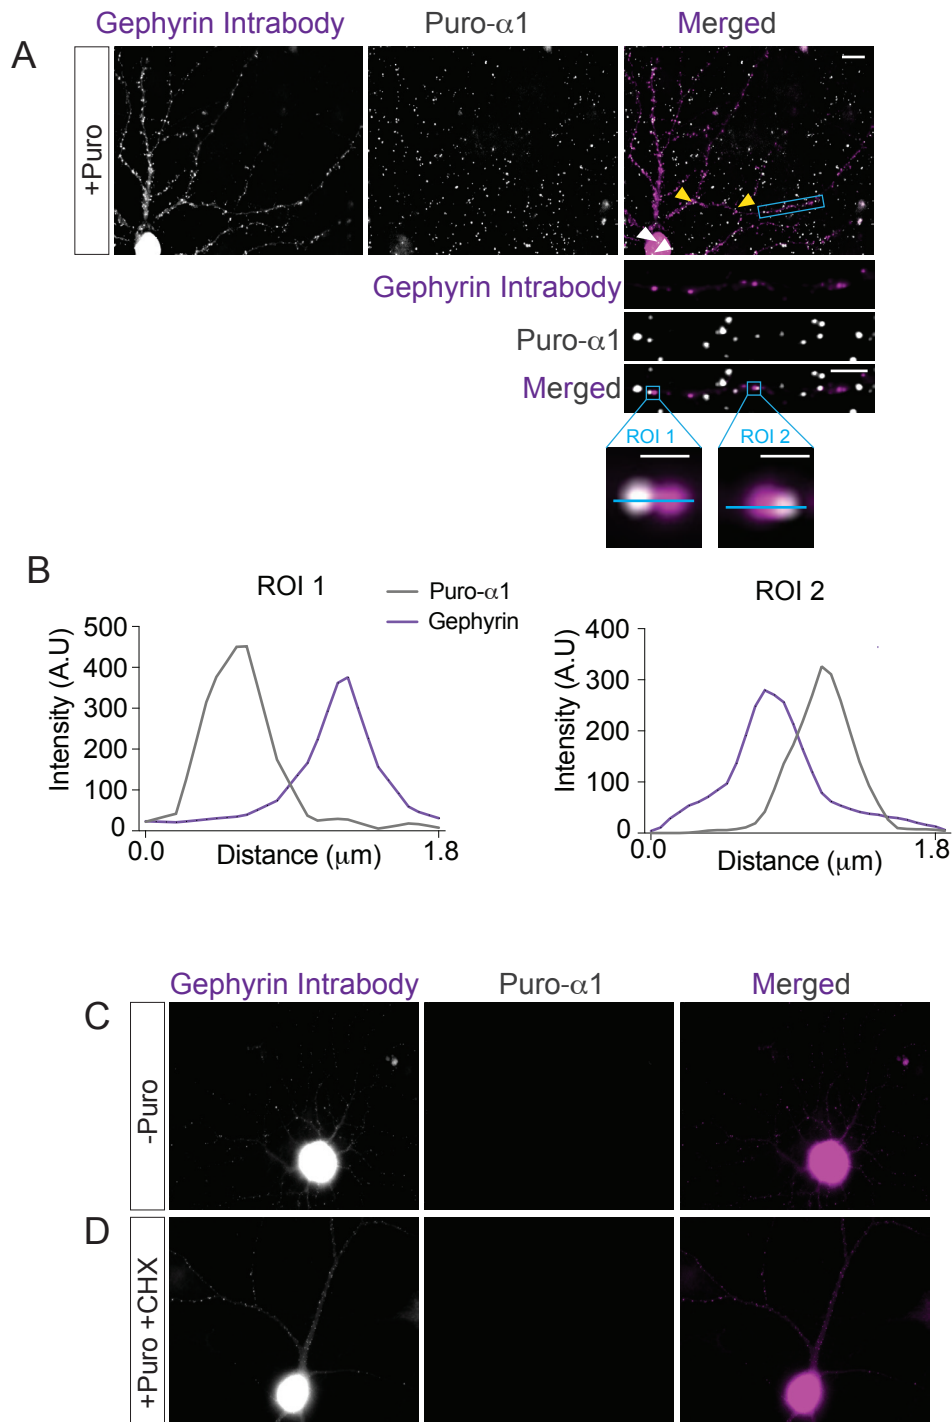

**Figure S5, related to Figure 5. *De novo* synthesis of GABA<sub>A</sub>R $\alpha$ 1 occurs at sites close to inhibitory synapses**

**A)** Puromycin-proximity ligation assay (Puro-PLA) for GABA<sub>A</sub>R $\alpha$ 1 performed in the presence of puromycin. Nascent GABA<sub>A</sub>R $\alpha$ 1 (Puro- $\alpha$ 1) in the soma (white arrow heads) and dendrites (yellow arrowheads) of hippocampal neurons. Puro- $\alpha$ 1 puncta not within the cell-fill is labeling from neurons not transfected with the gephyrin intrabody. Neurons were fed with 1 $\mu$ M of puromycin for 10 minutes prior to fixation. Dendritic enlargement of boxed area in the merged image is shown. Scale bar = 10 $\mu$ m for the whole cell image, 5 $\mu$ m for dendritic enlargement, 1 $\mu$ m for ROIs.

**B)** Line-scan analysis from 2 regions of interest (ROIs) marked show puro- $\alpha$ 1 adjacent to gephyrin labeled inhibitory synapses.

**C)** Puro-PLA for GABA<sub>A</sub>R $\alpha$ 1 performed in the absence of puromycin.

**D)** Puro-PLA for GABA<sub>A</sub>R $\alpha$ 1 performed in the presence of puromycin and cycloheximide (CHX).

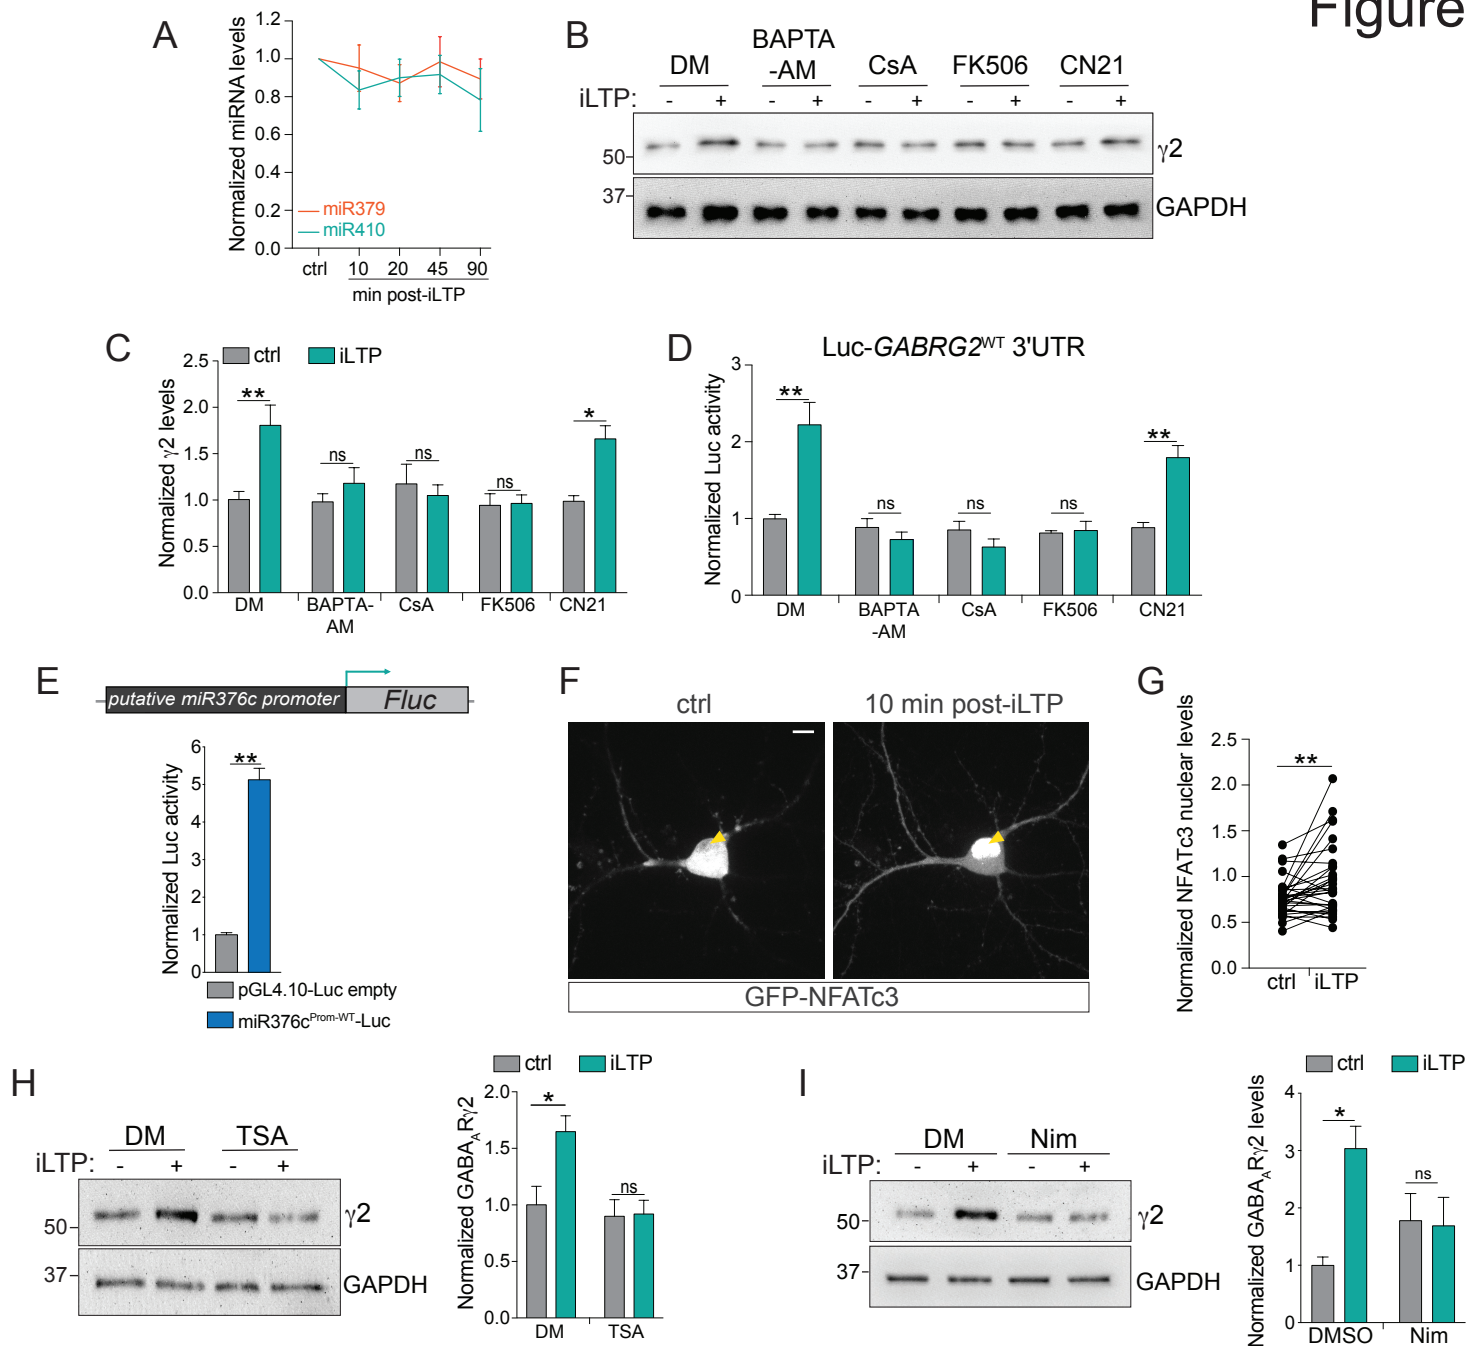

**Figure S6, related to Figure 7. L-type  $\text{Ca}^{2+}$  channels, calcineurin and NFATc3 signaling is involved in promoting *de novo* synthesis of GABA<sub>A</sub>R subunits  $\alpha 1$  and  $\gamma 2$  following iLTP. A)** qRT-PCR showing expression levels of mature miR379 and miR410 do not change following iLTP. miRNA levels were normalized to U6 snRNA,  $n=5$ . **B)** WBs showing levels of GABA<sub>A</sub>R $\gamma 2$  from resting neurons (ctrl) and from neurons 90 min post-iLTP-induction in the presence of DMSO (DM), BAPTA-AM, CsA, FK506 or TAT-CN21 (CN21). GAPDH blot is the same as Fig. 7C. **C)** Quantification of  $\gamma 2$  protein levels from B),  $n=6$ . **D)** Luciferase reporter readings of Luc-GABRG2 WT in resting neurons or in neurons 90 min post-iLTP-induction in the presence of DMSO (DM), BAPTA-AM, CsA, FK506 or TAT-CN21 (CN21),  $n=5$ . **E)** Luciferase assay showing the putative miR376c promoter (miR376cProm-WT-Luc) has significantly greater luciferase activity compared to a promoter-less empty luciferase reporter construct (pGL4.10-Luc empty). The putative miR376c promoter is the first 500bp of genomic sequence upstream of the pre-miR376c coding sequence. **F)** Live imaging showing GFP-NFATc3 translocates to the nucleus (yellow arrow heads) within 10 min of iLTP induction in hippocampal neurons. Scale bar =  $10\mu\text{m}$ . **G)** Quantification of nuclear GFP-NFATc3 levels. Nuclear expression was normalized to somatic expression. Scale bar =  $10\mu\text{m}$ ,  $n=40$  neurons from 5 independent experiments. **H)** WBs and quantification showing levels of GABA<sub>A</sub>R $\gamma 2$  from resting neurons (ctrl) or from neurons 90 min post-iLTP-induction in the presence of DMSO (DM) or Trichostatin A (TSA),  $n=6$ . GAPDH blot is the same as Fig. 7O. **I)** WBs and quantification showing L-type  $\text{Ca}^{2+}$  channel blockade with Nimodipine (Nim;  $10\mu\text{m}$ ) inhibits the iLTP-induced upregulation of GABA<sub>A</sub>R $\gamma 2$ . GABA<sub>A</sub>R $\gamma 2$  protein levels were normalized to GAPDH levels,  $n=3$ . GAPDH blot is the same as Fig. 7Q.

All values represent mean  $\pm$  SEM. \* $p < 0.05$  and \*\* $p < 0.01$ , by T-test (E,G), one-way ANOVA, Bonferroni *post hoc* test (A) or two-way ANOVA, Bonferroni *post hoc* test (C,D,H,I).

Figure S7

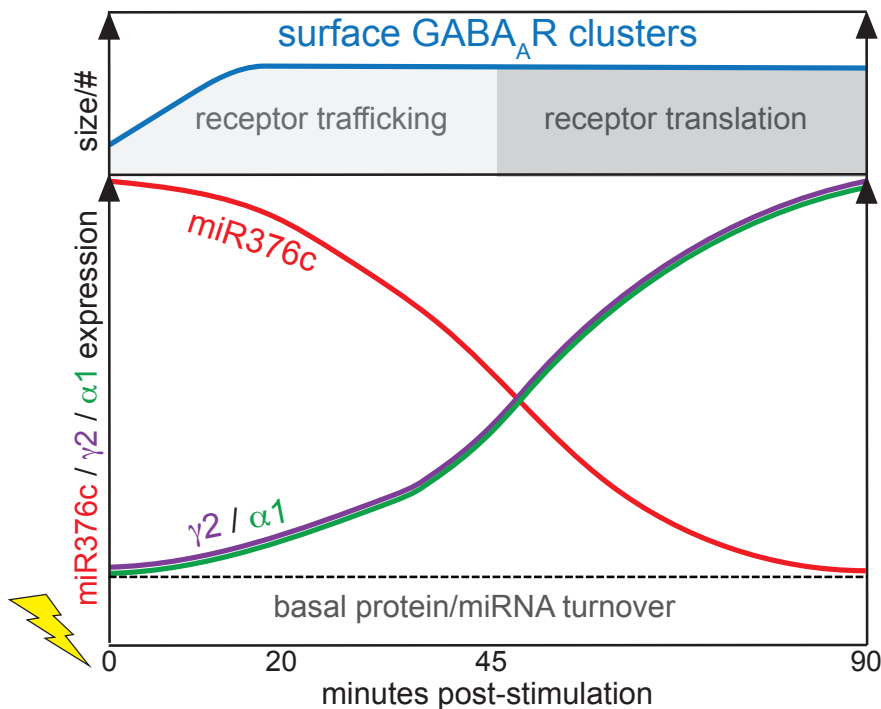

**Figure S7, related to Figures 1 and 4. miR376c reduction parallels increased *de novo* synthesis of synaptic GABA<sub>A</sub>R subunits following NMDAR activation.**

Following NMDAR-mediated iLTP stimulation, pre-existing assembled GABA<sub>A</sub>Rs are forward trafficked to the synapse to increase inhibitory synaptic strength (Marsden *et al.*, 2007, Petrini *et al.*, 2014). Maximal steady-state surface expression of GABA<sub>A</sub>Rs is achieved within the first 20 min of stimulation. During this time-frame, transcriptional-repression of the miR376c gene leads to a reduction in mature functional miR376c over time. This leads to an increase in *de novo* protein synthesis of  $\alpha 1$  and  $\gamma 2$  GABA<sub>A</sub>R subunits in dendrites, which assemble into functional synaptic GABA<sub>A</sub>Rs that can be incorporated into synapses, thereby maintaining potentiated GABAergic synapses.
