# Supplementary material for: Local miRNA-Dependent Translational Control of GABAAR Synthesis during Inhibitory Long-Term Potentiation
Source: PubMed Central journal article supplement — Cell Rep. Author manuscript; Available in PMC 2020 Sep 12. (PMC7486624; doi:10.1016/j.celrep.2020.107785), 2020-06-23
Supplement: NIHMS1607437-supplement-2.pdf [file NIHMS1607437-supplement-2.pdf]

# Local miRNA-Dependent Translational Control of GABA<sub>A</sub>R Synthesis during Inhibitory Long-Term Potentiation

## Graphical Abstract

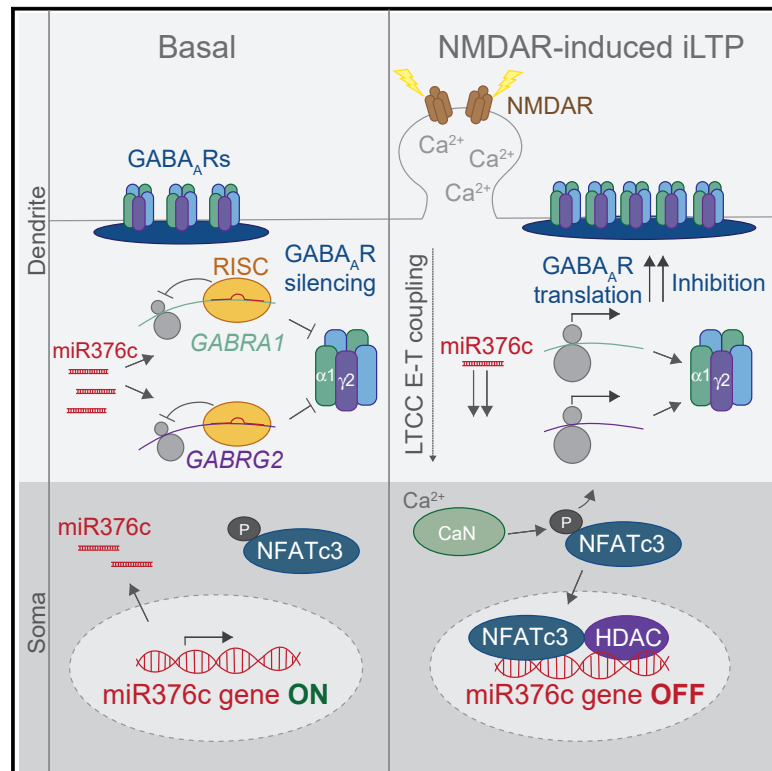

## Authors

Dipen Rajgor, Alicia M. Purkey, Jennifer L. Sanderson, Theresa M. Welle, Joshua D. Garcia, Mark L. Dell'Acqua, Katharine R. Smith

## Correspondence

katharine.r.smith@cuanschutz.edu

## In Brief

Clustering of GABA<sub>A</sub>Rs at inhibitory synapses is crucial for synaptic inhibition. Rajgor et al. discover that synaptic GABA<sub>A</sub>R expression is controlled by their local translation, regulated by miR376c. During inhibitory synaptic potentiation, miR376c is downregulated, relieving its translational repression of GABA<sub>A</sub>R mRNAs and leading to *de novo* synthesis of dendritic GABA<sub>A</sub>Rs.

## Highlights

- miR376c regulates GABAergic synapses by controlling GABA<sub>A</sub>R translation
- Reduced miR376c-mediated GABA<sub>A</sub>R translational repression is required for iLTP
- *De novo* GABA<sub>A</sub>Rs are synthesized specifically in dendrites during iLTP
- A CaN-NFAT-HDAC axis represses miR376c transcription leading to GABA<sub>A</sub>R translation

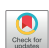

## Article

# Local miRNA-Dependent Translational Control of GABA<sub>A</sub>R Synthesis during Inhibitory Long-Term Potentiation

Dipen Rajgor,<sup>1</sup> Alicia M. Purkey,<sup>1</sup> Jennifer L. Sanderson,<sup>1</sup> Theresa M. Welle,<sup>1</sup> Joshua D. Garcia,<sup>1</sup> Mark L. Dell'Acqua,<sup>1</sup> and Katharine R. Smith<sup>1,2,\*</sup>

<sup>1</sup>Department of Pharmacology, University of Colorado School of Medicine, Anschutz Medical Campus, Aurora, CO 80045, USA

<sup>2</sup>Lead Contact

\*Correspondence: [katharine.r.smith@cuanschutz.edu](mailto:katharine.r.smith@cuanschutz.edu)

<https://doi.org/10.1016/j.celrep.2020.107785>

## SUMMARY

Molecular mechanisms underlying plasticity at brain inhibitory synapses remain poorly characterized. Increased postsynaptic clustering of GABA<sub>A</sub> receptors (GABA<sub>A</sub>Rs) rapidly strengthens inhibition during inhibitory long-term potentiation (iLTP). However, it is unclear how synaptic GABA<sub>A</sub>R clustering is maintained to sustain iLTP. Here, we identify a role for miR376c in regulating the translation of mRNAs encoding the synaptic  $\alpha$ 1 and  $\gamma$ 2 GABA<sub>A</sub>R subunits, *GABRA1* and *GABRG2*, respectively. Following iLTP induction, transcriptional repression of miR376c is induced through a calcineurin-NFAT-HDAC signaling pathway and promotes increased translation and clustering of synaptic GABA<sub>A</sub>Rs. This pathway is essential for the long-term expression of iLTP and is blocked by miR376c overexpression, specifically impairing inhibitory synaptic strength. Finally, we show that local *de novo* synthesis of synaptic GABA<sub>A</sub>Rs occurs exclusively in dendrites and in a miR376c-dependent manner following iLTP. Together, this work describes a local post-transcriptional mechanism that regulates inhibitory synaptic plasticity via miRNA control of dendritic protein synthesis.

## INTRODUCTION

Neuronal inhibition in the central nervous system is essential for information processing, cognition, and behavior, and its disruption contributes to numerous neurological disorders (Klausberger and Somogyi, 2008; Smith and Kittler, 2010; Tremblay et al., 2016). GABAergic synapses are the major sites of inhibition in the brain, and changes in their strength and plasticity profoundly affect the activity of neuronal networks (Chiu et al., 2019). Inhibitory synapses are dynamic structures, capable of undergoing multiple forms of long-term plasticity (Castillo et al., 2011). Regulating the number of GABA<sub>A</sub> receptors (GABA<sub>A</sub>Rs) at inhibitory postsynaptic sites is a key determinant of synaptic strength (Nusser et al., 1997), and changes in GABA<sub>A</sub>R trafficking, clustering, and stability have major effects on synaptic efficacy (Barberis, 2020; Luscher et al., 2011). For example, induction of inhibitory long-term potentiation (iLTP) promotes synaptic strengthening via the rapid recruitment and synaptic clustering of GABA<sub>A</sub>Rs and the postsynaptic scaffold gephyrin (Marsden et al., 2007; Petrini et al., 2014). However, the mechanisms that maintain iLTP-induced synaptic GABA<sub>A</sub>R clustering over extended time periods remain largely unknown and are likely to be critical for sustaining iLTP and controlling long-term neuronal excitability.

Local protein synthesis near excitatory synapses is crucial for meeting synaptic demands to support long-term and rapid synapse-specific changes (Biever et al., 2019; Cajigas et al., 2010).

However, little is known about translational regulation of GABAergic synapses and how local protein synthesis may affect their structure and function. MicroRNAs (miRNAs) have been identified as key regulators of the local synaptic protein translation that mediates excitatory synaptic plasticity (Hu and Li, 2017; Rangaraju et al., 2017; Schrott, 2009). These small non-coding RNAs inhibit translation by recruiting RNA-inducing silencing complexes (RISCs) to target mRNAs through complementary base pairing in 3' untranslated regions (UTRs; Pratt and MacRae, 2009). In the brain, miRNAs regulate an array of processes, including neuronal development and learning and memory (McNeill and Van Vactor, 2012; Wang et al., 2012), and their dysfunction is implicated in neurological disease (Rajgor, 2018; Thomas et al., 2018). miRNAs are expressed in neuronal dendrites, and their functions can be controlled by synaptic activity, allowing highly regulated and localized translation near synapses (Sambandan et al., 2017). Moreover, multiple independent miRNA pathways can converge to control the structural plasticity of dendritic spines, the translation and trafficking of AMPARs, and excitatory synaptic transmission following excitatory LTP and long-term depression (LTD) stimulation (Gu et al., 2015; Hu et al., 2014; Olde Loohuis et al., 2015). In contrast, the role of miRNAs in modulating the plasticity of inhibitory synapses remains unexplored.

Here, we find that local miRNA-dependent translational mechanisms are essential for persistent strengthening of inhibitory synapses following iLTP stimulation. We demonstrate that

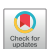

miR376c silences *GABRA1* and *GABRG2*, which encode for the critical synaptic GABA<sub>A</sub>R subunits  $\alpha 1$  and  $\gamma 2$ , respectively. Transcriptional repression of miR376c via NFATc3 and histone deacetylases (HDACs) reduces miR376c-mediated *GABRA1* and *GABRG2* silencing during iLTP, promoting *de novo* synthesis of the  $\alpha 1$  and  $\gamma 2$  subunits specifically in dendrites, providing a local post-transcriptional mechanism by which synaptic GABA<sub>A</sub>R expression can be increased to sustain iLTP.

## RESULTS

### Protein Synthesis Is Required for Maintaining Surface GABA<sub>A</sub>R Clustering after iLTP Induction

GABA<sub>A</sub>Rs are rapidly trafficked to inhibitory synapses within the first 20 min of iLTP induction to increase GABA<sub>A</sub>R synaptic clustering and synapse strength (Marsden et al., 2007; Petriani et al., 2014). Yet how long this increase in synaptic strength persists remains unknown. To induce iLTP in hippocampal neurons, we used a well-established mild NMDAR activation protocol (iLTP: 20  $\mu$ M NMDA and 10  $\mu$ M CNQX for 2 min), which increases GABA<sub>A</sub>R surface expression and GABAergic currents (Marsden et al., 2007; Petriani et al., 2014). We examined levels of synaptic GABA<sub>A</sub>Rs (surface  $\gamma 2$ ) in dendrites at 20, 45, and 90 min post-stimulation (Figure 1A) and co-labeled with antibodies to gephyrin and the inhibitory presynaptic marker vesicular GABA transporter (VGAT). In all conditions,  $\sim 90\%$  of surface  $\gamma 2$ -containing GABA<sub>A</sub>R clusters were positive for gephyrin or VGAT (Figure S1A). Consistent with previous work (Petriani et al., 2014), we observed increased synaptic GABA<sub>A</sub>R and gephyrin cluster area and density in dendrites at 20 min post-iLTP stimulation, accompanied by increased VGAT puncta density (Figures 1A and 1B). These increases were maintained at 45 and 90 min post-stimulation, indicating that maximal steady state of synaptic surface GABA<sub>A</sub>R expression was achieved within the first 20 min of iLTP induction and maintained for at least 90 min (Figures 1A and 1B). Somatic inhibitory synapses within the same neurons were unaffected (Figures S1B and S1C), suggesting that only dendritic inhibitory synapses are affected by iLTP stimulation.

*De novo* protein synthesis may maintain potentiated inhibitory synapses over extended time periods. To explore this possibility, we induced iLTP in the presence of the translational inhibitor cycloheximide (CHX; 10  $\mu$ g/mL) and measured levels of dendritic surface GABA<sub>A</sub>Rs, gephyrin, and VGAT. CHX had no effect on GABA<sub>A</sub>R clustering at 20 and 45 min post-iLTP (Figures 1A and 1B), but by 90 min post-iLTP, clustering of all three proteins was reduced to basal levels. In unstimulated neurons, dendritic synaptic GABA<sub>A</sub>R, gephyrin, and VGAT levels were unaffected by the presence of CHX at all time points, indicating that blocking protein synthesis does not influence basal clustering and synapse numbers (Figures 1A and 1B). CHX also did not affect somatic inhibitory synapses in stimulated or unstimulated neurons (Figures S1B and S1C). To complement these imaging data, we performed surface biotinylation assays, which also showed increased surface GABA<sub>A</sub>R expression at 20 and 90 min post-iLTP induction, and blockade of this increase at 90 min by CHX (Figure S1D). We also observed a reduction in surface GluA1 AMPARs from the same neuronal population, confirming that

LTD of excitatory synapses occurs alongside iLTP (Figure S1D). Together, these data suggest that protein synthesis maintains increased dendritic GABA<sub>A</sub>R-gephyrin clustering and synapse density over extended time periods of iLTP expression.

### iLTP-Induced *De Novo* Protein Synthesis of Inhibitory Synaptic Proteins

To determine whether key postsynaptic inhibitory proteins are upregulated following iLTP stimulation, we examined hippocampal lysates at 45 and 90 min post-iLTP induction (Figure 1C). We measured increased expression of gephyrin and GABA<sub>A</sub>R subunits  $\alpha 1$  and  $\gamma 2$  at 90 min, but no increase in the  $\beta 3$  subunit, the extra-synaptic  $\alpha 5$  subunit, or the AMPAR GluA1 subunit (Figure 1C). Importantly, CHX abolished the iLTP-induced increases in  $\alpha 1$ ,  $\gamma 2$ , and gephyrin expression observed at 90 min, demonstrating that core inhibitory synaptic components undergo *de novo* protein synthesis following iLTP induction (Figure 1D).

### *GABRA1* and *GABRG2* Undergo Post-transcriptional Regulation after iLTP Induction

The *de novo* synthesis of  $\alpha 1$  and  $\gamma 2$  GABA<sub>A</sub>R subunits following iLTP stimulation could be due to transcriptional or post-transcriptional regulation of their mRNAs, *GABRA1* and *GABRG2*, respectively. qRT-PCR showed no change in *GABRA1* or *GABRG2* levels 90 min post-iLTP compared with controls (Figure 2A), indicating that synthesis of  $\alpha 1$  and  $\gamma 2$  following iLTP is not due to changes in their gene transcription. There were also no changes in the mRNA levels of *GABRB3*, *GABRA4*, *GABRA5*, and *GRIA1*, which encode for the GABA<sub>A</sub>R  $\beta 3$ ,  $\alpha 4$ ,  $\alpha 5$ , and AMPAR GluA1 subunits, respectively (Figure 2A).

As miRNAs represent likely candidates to regulate activity-dependent translation of GABA<sub>A</sub>Rs, we performed Argonaute-2 (Ago2) RNA immunoprecipitation assays to determine if *GABRA1* and *GABRG2* are regulated by miRNAs during iLTP. The amount of these mRNAs incorporated into RISCs is indicative of mRNA silencing in a miRNA-dependent manner. RISCs were isolated by immunoprecipitation of Ago2 (Figure 2B), and bound RNAs were eluted and analyzed using qRT-PCR. Significantly less *GABRA1* and *GABRG2* were bound to Ago2 at 90 min post-iLTP induction compared with controls (Figure 2B), indicating that miRNA-mediated gene silencing of *GABRA1* and *GABRG2* is likely reduced following iLTP. In contrast, there was more *GRIA1* bound to Ago2 following stimulation, which is in line with reduced synaptic AMPAR expression following excitatory LTD (Hu et al., 2015). Importantly, there were no changes in the levels of *GABRA4*, *GABRA5*, and *GABRB3* bound to Ago2 (Figure 2B), signifying that these transcripts are not regulated in a miRNA-dependent manner following iLTP.

### miR376c Is a Translational Regulator of *GABRA1* and *GABRG2*

To identify miRNAs that might regulate the iLTP-dependent translation of *GABRA1* and *GABRG2*, we screened for miRNAs exhibiting expression changes in response to the mild NMDAR activation that induces iLTP. A next-generation sequencing (NGS) study demonstrated miRNA expression changes in response to this treatment in hippocampal brain slices (Hu et al., 2014) and identified 36 miRNAs to be downregulated at

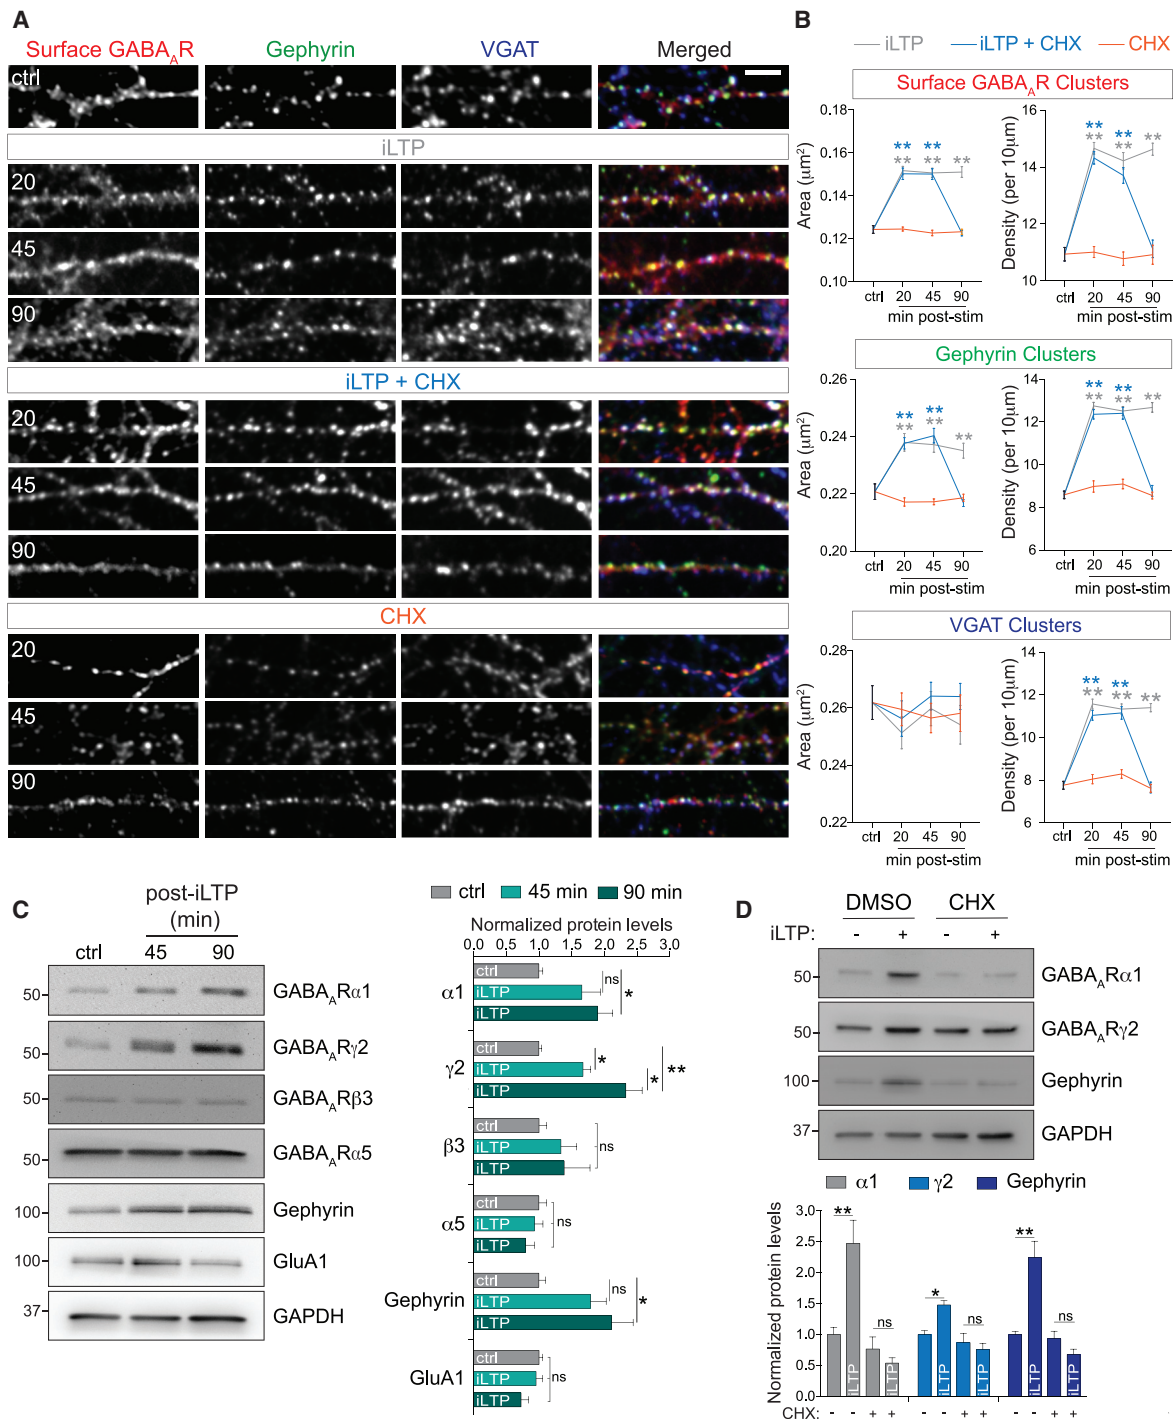

**Figure 1. Protein Synthesis Is Required to Maintain Dendritic Surface GABA<sub>A</sub>R<sub>s</sub> after iLTP**

(A) Representative dendritic segments of hippocampal neurons labeled with antibodies to surface GABA<sub>A</sub>R(γ2) and intracellular gephyrin and VGAT. Neurons were fixed at 20, 45, and 90 min post-treatment: iLTP induction, iLTP induction in the presence of cycloheximide (CHX), or CHX alone. Scale bar, 10 μm.

(B) Quantification of cluster area and density from (A). n = 15 or 16 cells per condition. Colored stars compare statistical significance to the control (ctrl).

(C) Hippocampal lysates analyzed at 45 and 90 min post-iLTP induction. Protein levels were normalized to GAPDH; n = 5.

(D) α1, γ2, and gephyrin upregulation can be blocked by cycloheximide (CHX) at 90 min post-iLTP. Protein levels were normalized to GAPDH; n = 5.

All values represent mean ± SEM. \*p < 0.05 and \*\*p < 0.01, one-way ANOVA, Bonferroni post hoc test (C) or two-way ANOVA, Bonferroni post hoc test (B and D).

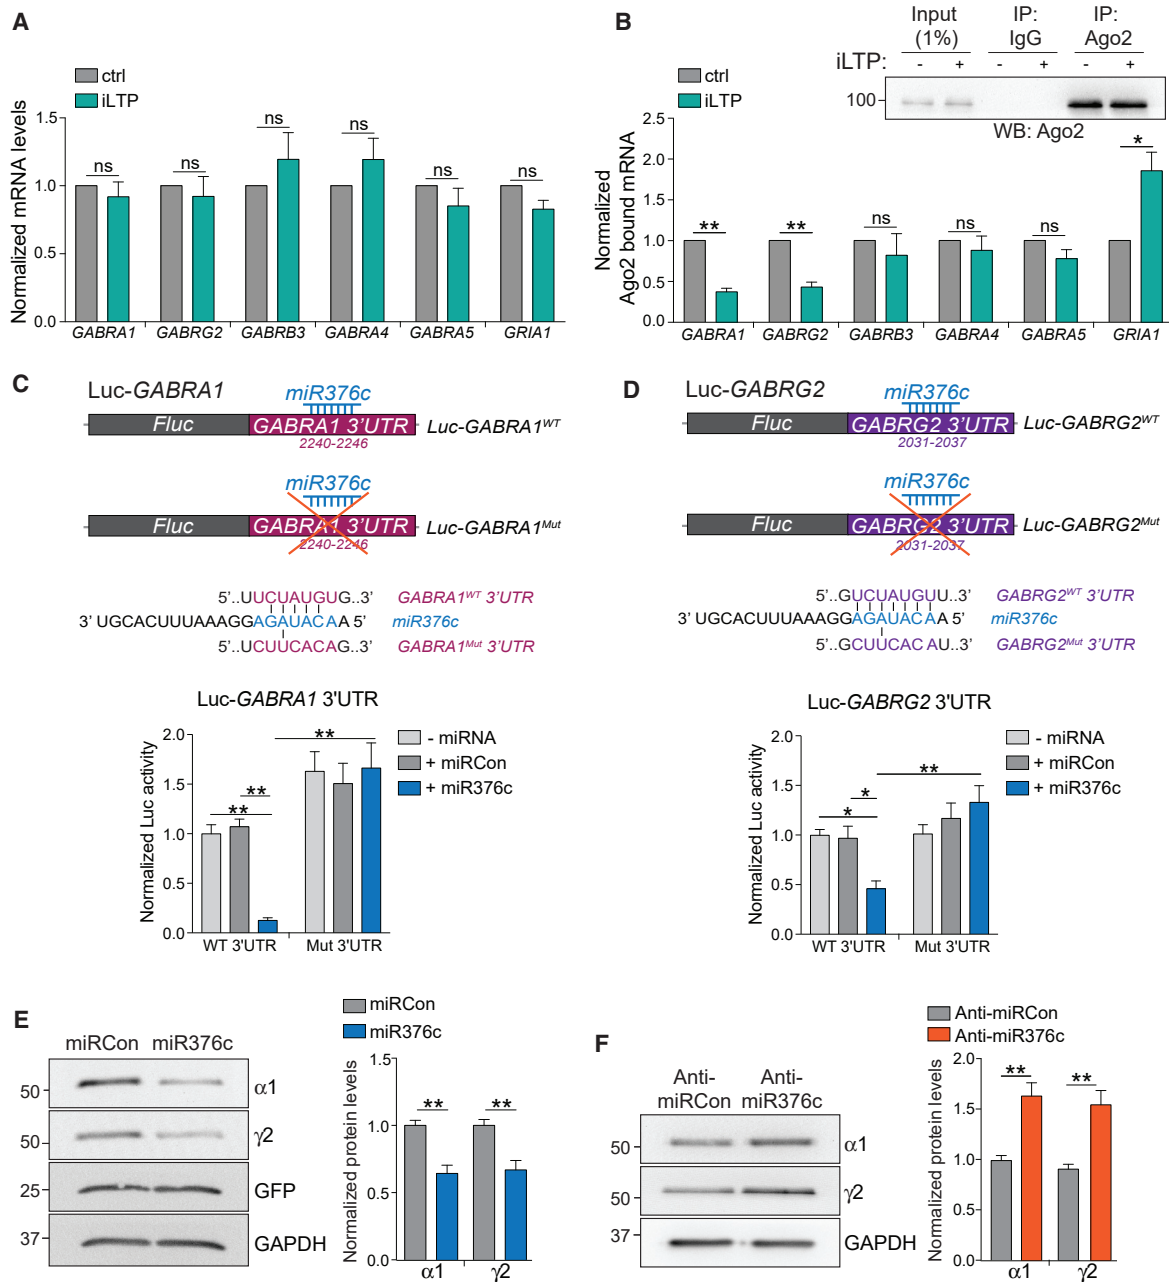

**Figure 2. miR376c Silences GABRA1 and GABRG2**

(A) qRT-PCR measuring mRNA levels 90 min post-iLTP induction. Readings were normalized to U6 small nuclear RNA (snRNA) levels; n = 5.  
 (B) Ago2 was immunoprecipitated equally from control neurons and from neurons 90 min post-iLTP induction. qRT-PCR measured mRNA bound to Ago2. Readings were normalized to total levels from (A); n = 5.  
 (C) Schematic of the Luc-GABRA1 luciferase reporters. miR376c seed site is mutated in Luc-GABRA1<sup>Mut</sup>. Graph of Luc-GABRA1 activities in HEK293T cells co-expressing miR376c, miRCon, or no miRNA. Firefly activities were normalized to Renilla activity; n = 6.  
 (D) As in (C) but for GABRG2; n = 10.  
 (E) Levels of α1 and γ2 in neurons expressing miRCon or miR376c; n = 6. miRNA expression constructs contain a GFP reporter.  
 (F) Levels of α1 and γ2 in neurons expressing anti-miRCon or anti-miR376c; n = 5.  
 All values represent mean ± SEM. \*p < 0.05 and \*\*p < 0.01, t test (A, B, E, and F) and two-way ANOVA, Bonferroni post hoc test (C and D).

90 min post-stimulation. Any targets of these miRNAs should undergo enhanced translation following stimulation. Surprisingly, one of these miRNAs, miR376c, was predicted to contain conserved seed sites in the 3' UTR of both *GABRA1* and *GABRG2* as determined by TargetScan 7.0 and miRDB prediction algorithms (Lewis et al., 2003; Wong and Wang, 2015), suggesting that miR376c might mediate translational repression of two synaptic GABA<sub>A</sub>R subunits.

To determine the functionality of the predicted miR376c seed sites in *GABRA1* and *GABRG2*, we fused their 3' UTRs to a Firefly luciferase reporter construct (Luc-*GABRA1*<sup>WT</sup> and Luc-*GABRG2*<sup>WT</sup>, respectively) and performed dual luciferase reporter assays in HEK293 cells (Figures 2C and 2D). Co-transfection of Luc-*GABRA1*<sup>WT</sup> or Luc-*GABRG2*<sup>WT</sup> with miR376c significantly attenuated luciferase activity of both reporter constructs compared with a control miRNA (miRCon) or no miRNA co-expression (Figures 2C and 2D), indicative of increased silencing. However, miR376c co-expression did not silence reporter activity of *GABRA1* or *GABRG2* constructs with their predicted miR376c seed sites mutated (Luc-*GABRA1*<sup>Mut</sup> or Luc-*GABRG2*<sup>Mut</sup>; Figures 2C and 2D), strongly suggesting that *GABRA1* and *GABRG2* each contain a single functional miR376c binding site. This strong silencing of the *GABRA1* and *GABRG2* wild-type (WT) reporter activity could be due to miR376c promoting endonucleolytic cleavage of *GABRA1* and *GABRG2*. However, miR376c overexpression did not alter the luciferase mRNA levels for Luc-*GABRA1*<sup>WT</sup> or Luc-*GABRG2*<sup>WT</sup> (Figure S2A), indicating that miR376c does not induce mRNA endonucleolytic cleavage and degradation.

Next, we examined the ability of miR376c to regulate endogenous GABA<sub>A</sub>R  $\alpha$ 1 and  $\gamma$ 2 expression in hippocampal neurons. We found that miR376c overexpression reduced protein levels of both subunits by ~50% compared with miRCon (Figure 2E) without altering their mRNA levels (Figure S2B), further indicating a mechanism of miR376c-mediated translational repression rather than of mRNA degradation. In contrast, an inhibitory anti-miR designed to block the function of endogenous miR376c (anti-miR376c) significantly increased protein levels of both subunits by ~50% compared with a control inhibitor (anti-miRCon; Figure 2F). Neither miR376c overexpression or inhibition changed the protein levels of  $\beta$ 3,  $\alpha$ 5, gephyrin, or GluA1 (Figures S2C and S2D), confirming that miR376c specifically regulates *GABRA1* and *GABRG2* translation in hippocampal neurons. To further validate the specificity of anti-miR376c, we examined its regulation of  $\alpha$ 1 and  $\gamma$ 2 expression compared with an anti-miR for miR134, a dendritic miRNA that controls the translation of Lim kinase 1 (LIMK1) (Schratt et al., 2006). Anti-miR376c increased expression of  $\alpha$ 1 and  $\gamma$ 2, but had no effect on LIMK1 levels. Furthermore, anti-miR134 induced upregulation of LIMK1, but not  $\alpha$ 1 and  $\gamma$ 2 GABA<sub>A</sub>R subunits (Figure S1E), emphasizing the specificity of these miRNAs for their targets.

### miR376c Affects Synaptic GABA<sub>A</sub>R Levels

As miR376c manipulation had significant effects on total  $\alpha$ 1 and  $\gamma$ 2 protein expression, we then asked whether GABA<sub>A</sub>R abundance at synapses was also affected. We first performed immunocytochemistry experiments with neurons expressing miRCon or miR376c to detect surface  $\gamma$ 2 and either gephyrin or VGAT.

Cluster analysis of dendritic surface  $\gamma$ 2 revealed that overexpression of miR376c reduced surface GABA<sub>A</sub>R cluster area and density and VGAT cluster density, with no effect on gephyrin clusters (Figure 3A). In contrast, overexpression of miR376c had no effect on the area of somatic surface GABA<sub>A</sub>R clusters, although it slightly increased their density (Figure S3A), indicating potentially region-specific effects. To verify these results using another method, we performed electrophysiological recordings of miniature inhibitory postsynaptic currents (mIPSCs) from miRCon- or miR376c-expressing neurons. miR376c expression specifically reduced mIPSC frequency, with no change in amplitude or kinetic properties compared with unaffected neurons or neurons expressing miRCon (Figures 3B and S3B). Together, this shows that increasing repression of  $\alpha$ 1 and  $\gamma$ 2 translation by miR376c expression leads to a reduction in GABA<sub>A</sub>Rs at dendritic inhibitory synapses that is manifested by a reduction in the total number of functional synapses. The observation that mean mIPSC amplitude is not affected by miR376c overexpression likely reflects the lack of impact of this manipulation on somatic GABA<sub>A</sub>Rs (Figure S3A), which have outsized contributions to mIPSC amplitude measurements made from the soma, due to distance-dependent filtering of dendritic synaptic responses. miR376c overexpression also had no effect on surface AMPAR levels or miniature excitatory postsynaptic current (mEPSC) amplitude or frequency (Figures 3C and 3D), underlining the specificity of miR376c for its inhibitory targets. Surprisingly, expression of the inhibitory anti-miR376c had no impact on dendritic or somatic inhibitory synapse area or density (Figures S3C and S3D) or mIPSC event parameters (Figure S3E) compared with anti-miRCon. This is likely due to the requirement that other essential proteins would also need to be upregulated to form larger and more numerous synapses following iLTP, so although synthesis of GABA<sub>A</sub>R  $\alpha$ 1 and  $\gamma$ 2 subunits are upregulated by anti-miR376c, these subunits are not being assembled into functional GABA<sub>A</sub>Rs and/or delivered to the synapse.

### miR376c-Mediated *GABRA1* and *GABRG2* Silencing Is Reduced after iLTP Induction

We next assessed whether miR376c levels decrease following iLTP stimulation, as suggested by NGS data (Hu et al., 2014). qRT-PCR showed an ~35% reduction in miR376c levels at 20 and 45 min post-iLTP induction and an ~60% reduction by 90 min (Figure 4A), which parallels increasing  $\alpha$ 1 and  $\gamma$ 2 expression following iLTP (Figure 1C). We observed no change in levels of miR29a, a miRNA previously shown not to respond to NMDA stimulation (Hu et al., 2014). Reporter activities of Luc-*GABRA1*<sup>WT</sup> and Luc-*GABRG2*<sup>WT</sup> in hippocampal neurons both consequently increased at 90 min post-iLTP (Figures 4B and 4C), indicating that downregulation of miR376c may be sufficient to reduce *GABRA1* and *GABRG2* silencing. Surprisingly, basal activity of the Luc-*GABRA1*<sup>Mut</sup> reporter was increased compared with the WT reporter such that it mimicked and occluded the impact of iLTP (Figure 4B). Although basal Luc-*GABRG2*<sup>Mut</sup> reporter activity was also increased, it did not completely occlude the effect of iLTP (Figure 4C), suggesting that additional mechanisms may regulate iLTP-dependent *GABRG2* translation. Importantly, anti-miR376c also increased

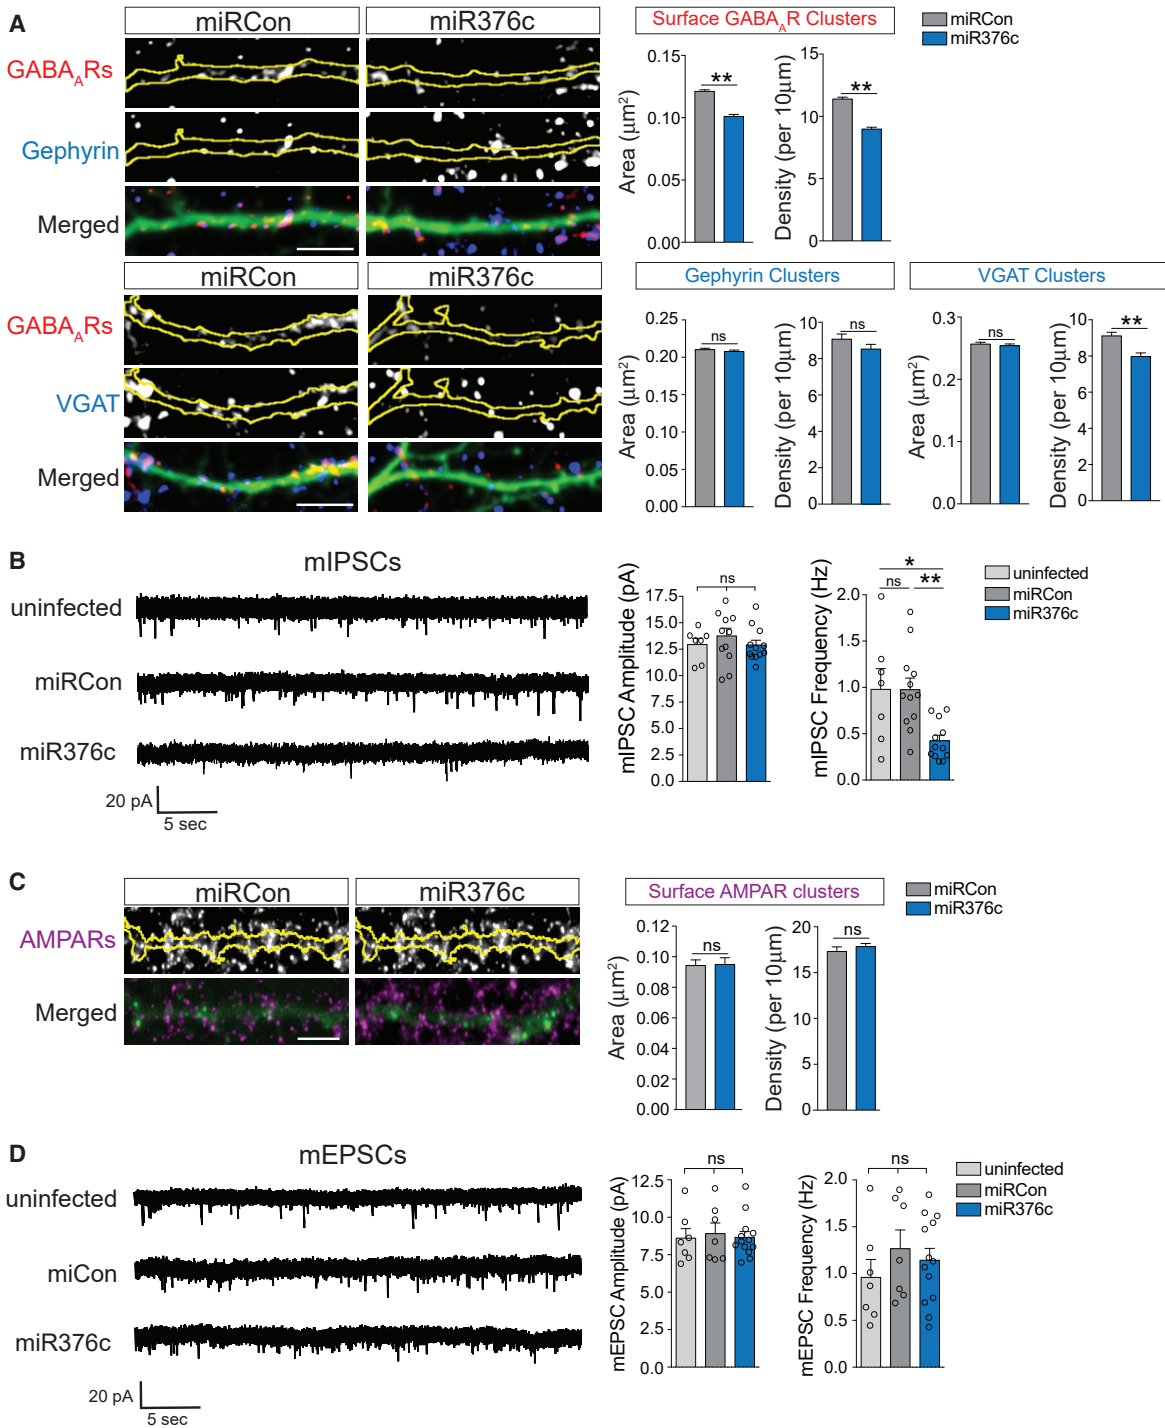

**Figure 3. miR376c Regulates Inhibitory Synaptic Strength**

(A) Representative dendritic segments from neurons expressing miRCon or miR376c and labeled with antibodies to GABA<sub>A</sub>Rs (surface γ2) and gephyrin or VGAT. Yellow outlines are derived from GFP fill. Graphs show dendritic cluster area and density. Scale bar, 5 μm; n = 7–18 cells per condition.

(B) Representative miniature inhibitory postsynaptic current (mIPSC) traces from uninfected neurons or neurons expressing miRCon or miR376c. Graphs show mIPSC amplitude and frequency; n = 7–12 cells per condition.

(C) Representative dendritic segments from neurons expressing miRCon or miR376c, and labeled with antibodies to surface GluA1. Graphs show quantification of dendritic GluA1 cluster area and density. Scale bar, 5 μm; n = 19 cells per condition.

(D) Representative miniature excitatory postsynaptic current (mEPSC) traces from uninfected neurons or neurons expressing miRCon or miR376c. Graphs show mEPSC amplitude and frequency; n = 7–13 cells per condition.

All values represent mean ± SEM. \*p < 0.05 and \*\*p < 0.01, t test (A and C) and one-way ANOVA, Bonferroni post hoc test (B and D).

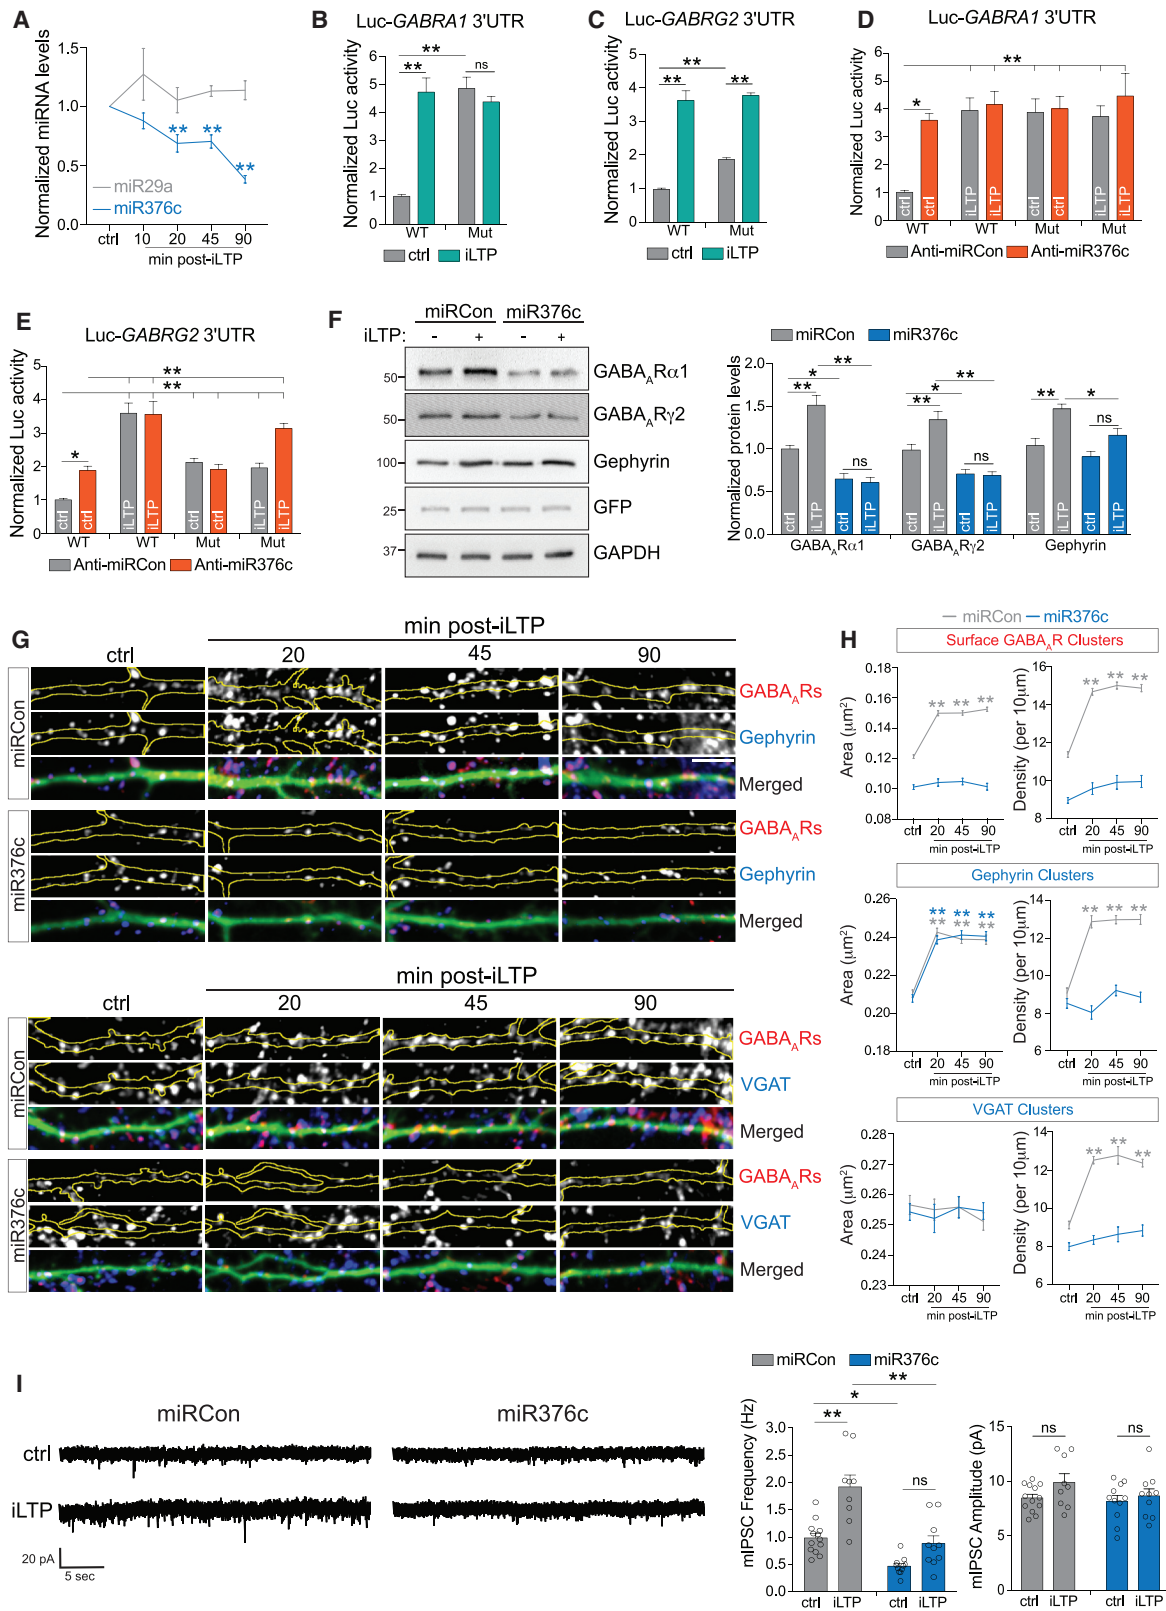

(legend on next page)



basal activity of both Luc-*GABRG1*<sup>WT</sup> and Luc-*GABRG2*<sup>WT</sup> reporters, resulting in complete or partial occlusion of their regulation by iLTP, respectively (Figures 4D and 4E). Together, this suggests that although miR376c is likely to be the major post-transcriptional silencing mechanism for *GABRA1* in resting neurons, the 3' UTR of *GABRG2* may be regulated by additional post-transcriptional mechanisms. Yet notably, miR376c overexpression completely attenuated the upregulation of endogenous  $\alpha 1$  and  $\gamma 2$  protein expression following iLTP (Figure 4F), indicating that downregulation of this miRNA is likely to be the major mechanism promoting *de novo* synthesis of both  $\alpha 1$  and  $\gamma 2$  GABA<sub>A</sub>R subunits following iLTP. Although miR376c overexpression did not reduce levels of gephyrin under basal conditions, it did attenuate its upregulation following iLTP (Figure 4F), suggesting that there is also likely interplay between regulation of GABA<sub>A</sub>R and gephyrin protein levels.

### miR376c Overexpression Blocks Potentiation of Inhibitory Synapses after iLTP Induction

As miR376c overexpression blocked the *de novo* synthesis of  $\alpha 1$  and  $\gamma 2$  GABA<sub>A</sub>R subunits following iLTP, we next examined whether it was also able to attenuate the iLTP-induced increases in inhibitory synapse density and surface GABA<sub>A</sub>R clustering. We observed that miR376c overexpression prevented iLTP upregulation of both inhibitory synapse density (as reflected in no change in cluster density for surface GABA<sub>A</sub>Rs, gephyrin, and VGAT) and the level of surface GABA<sub>A</sub>R clustering (as reflected in no change in surface GABA<sub>A</sub>Rs cluster area), without altering gephyrin cluster area (Figures 4G and 4H). Consistent with the finding above that anti-miR376c did not affect basal characteristics of GABAergic synapses (Figures S3C–S3E), expression of anti-miR376c also did not affect upregulation of dendritic surface GABA<sub>A</sub>R, gephyrin, and VGAT clusters 90 min following iLTP stimulation (Figures S4A and S4B), further supporting the idea that removing translational repression of  $\alpha 1$  and  $\gamma 2$  is not sufficient to mimic iLTP. We also measured mIPSCs from separate populations of hippocampal neurons overexpressing miR376c or miRCon both under basal conditions and 20–60 min following iLTP stimulation (Figure 4I). Consistent with our imaging results, we observed a persistent increase in mIPSC frequency during this phase of iLTP in neurons overexpressing miRCon, but not in neurons overexpressing miR376c (Figure 4I). Mean mIPSC amplitude also did not change following iLTP stimulation of miR376c-expressing neurons as expected (Figure 4I). However, perhaps unexpectedly, there was no significant in-

crease in mIPSC amplitude following iLTP in miRCon expressing neurons. This is likely due to the challenges discussed above in detecting changes in the size of smaller dendritic mIPSC responses against a constant background of larger somatic mIPSC responses combined with levels of experimental variation that are inherent when comparing different populations of control and iLTP treated neurons. Nonetheless, together these results show that overexpression of miR376c can prevent the upregulation of surface GABA<sub>A</sub>R clusters and the number of functional inhibitory synapses following iLTP stimulation.

### Increased *De Novo* Synthesis of Dendritic GABA<sub>A</sub>Rs after iLTP Induction

Local transcriptome data indicate that both *GABRA1* and *GABRG2* are abundantly expressed in the soma and synaptic neuropil (Cajigas et al., 2012), suggesting that these mRNAs may be locally translated in dendrites. To test whether GABA<sub>A</sub>R mRNAs are translated in dendrites in response to iLTP stimulation, we performed puromycin-proximity ligation assays (puro-PLAs), which enable the direct visualization of *de novo* protein synthesis *in situ* (Sambandan et al., 2017). Neurons were pulsed with puromycin for 10 min prior to fixation, allowing both the location and amount of *de novo* protein synthesis to be determined. We assayed for *de novo*  $\alpha 1$  subunit protein, as a suitable  $\gamma 2$  antibody compatible with puro-PLA is currently unavailable. First, we performed puro-PLAs in neurons expressing a gephyrin intrabody to label endogenous gephyrin (Gross et al., 2013), allowing visualization of  $\alpha 1$  synthesis sites relative to inhibitory synapses. The addition of puromycin resulted in detection of nascent puro- $\alpha 1$  in dendritic regions within the vicinity of some inhibitory synaptic sites marked by gephyrin, as well as in the soma (Figures S5A and S5B). In control experiments, puro- $\alpha 1$  PLA signal was not detected when this assay was performed in the presence of CHX or in the absence of puromycin (Figures S5C and S5D).

To determine whether miR376c-dependent *GABRA1* silencing occurs in neuronal dendrites and/or the soma, we performed puro-PLAs with neurons expressing the control or anti-miR376c inhibitor (Figures 5A and 5B). In control conditions, miR376c inhibition readily increased puro- $\alpha 1$  labeling in the dendrites, but not in the soma (Figures 5A and 5B). Furthermore, the anti-miR376c occluded any increase in translation following iLTP. Surprisingly, iLTP induction did not affect somatic  $\alpha 1$  translation in neurons expressing the control or anti-miR376c inhibitor (Figure 5B), suggesting that miR376c-*GABRA1* silencing occurs

#### Figure 4. miR376c-Mediated Gene Silencing Is Reduced after iLTP

- (A) qRT-PCR showing miRNA expression levels following iLTP induction (normalized to U6 snRNA). Colored stars compare statistical significance to the ctrl; n = 4.  
 (B) Luc-*GABRA1* activity in neurons under control conditions or 90 min post-iLTP induction; n = 5.  
 (C) As in (B) but for Luc-*GABRG2*; n = 5.  
 (D) Luc-*GABRA1* activity in neurons expressing anti-miRCon or anti-miR376c, under control conditions or 90 min post-iLTP induction; n = 5.  
 (E) As in (D), but for Luc-*GABRG2*; n = 5.  
 (F)  $\alpha 1$ ,  $\gamma 2$ , and gephyrin levels 90 min post-iLTP induction in neurons expressing miRCon or miR376c; n = 6.  
 (G) GFP-filled dendritic segments from miRNA overexpressing hippocampal neurons labeled with antibodies to surface GABA<sub>A</sub>R $\gamma 2$  and gephyrin or VGAT. Scale bar, 10  $\mu$ m.  
 (H) Quantification of cluster area and density from (E); n = 16–18 neurons per condition. Colored stars compare statistical significance with ctrl.  
 (I) mIPSC traces from neurons infected with miRCon or miR376c. Graphs show mIPSC amplitude and frequency; n = 9–13 cells per condition. All values represent mean  $\pm$  SEM. \*p < 0.05 and \*\*p < 0.01, one-way ANOVA, Bonferroni post hoc test (A) and two-way ANOVA, Bonferroni post hoc test (B–F and I).

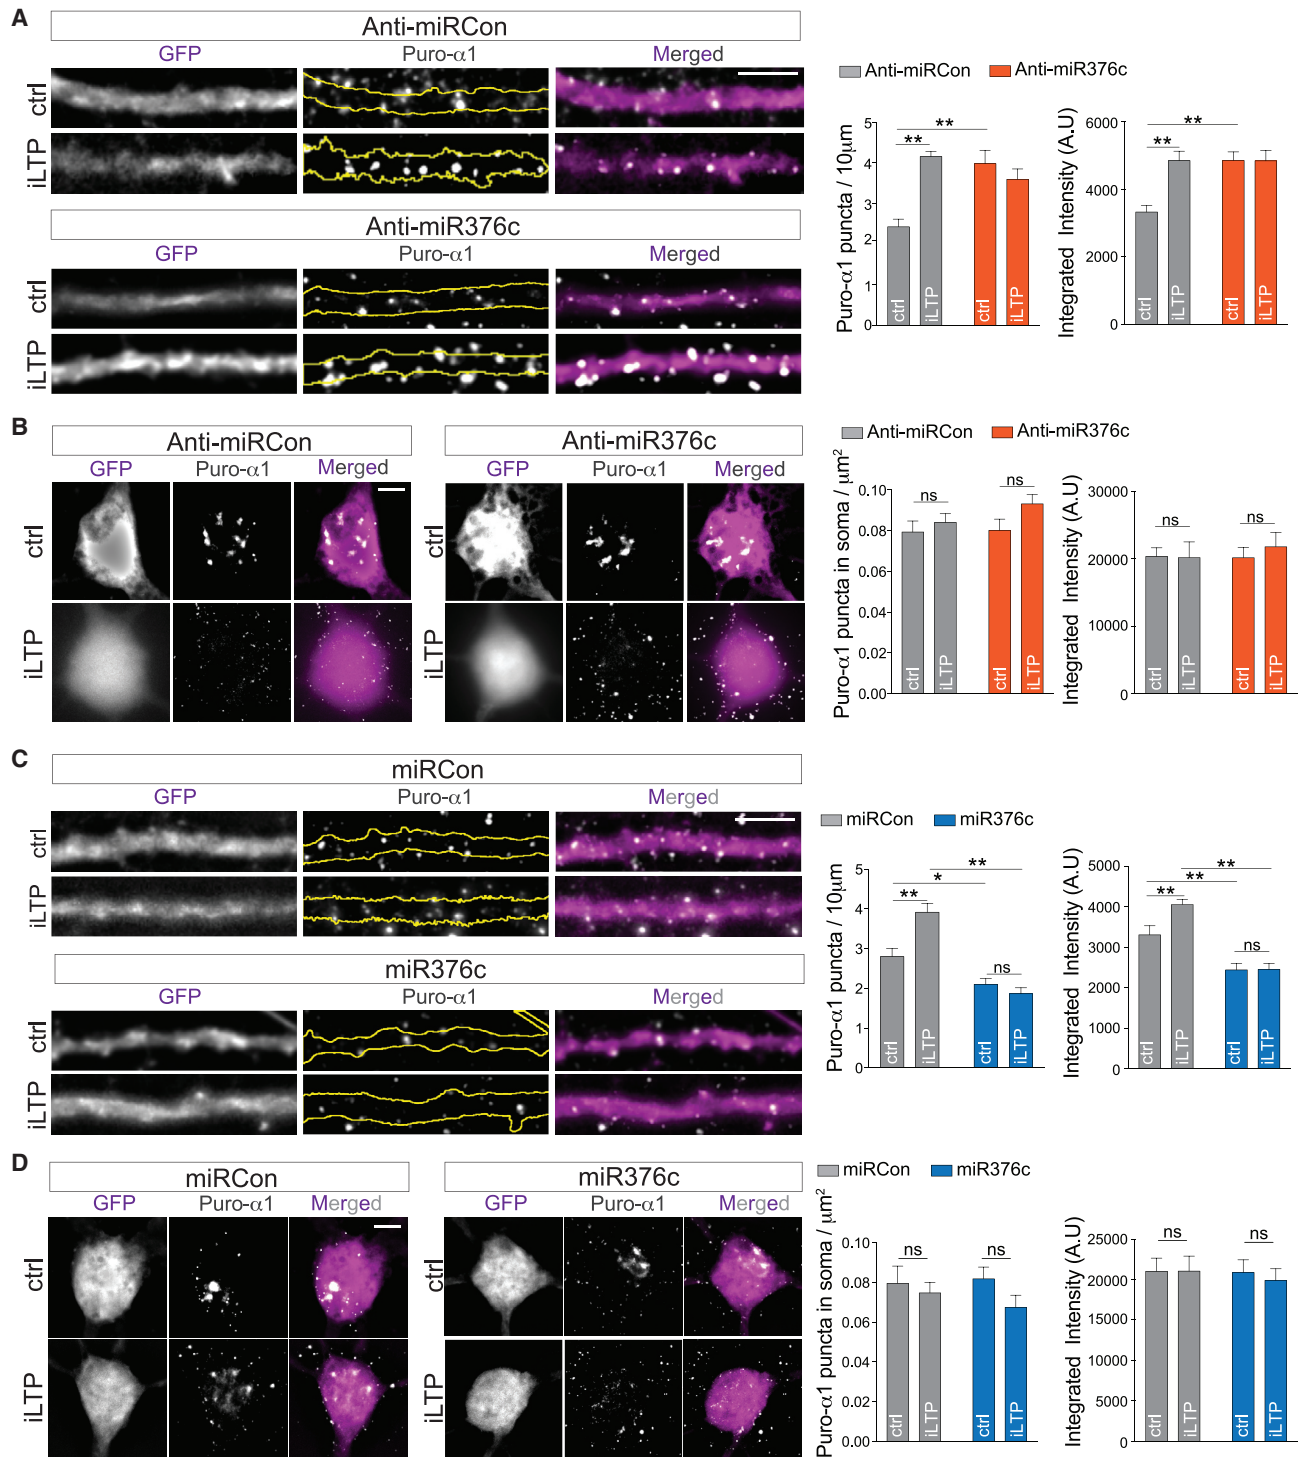

**Figure 5. GABA<sub>A</sub>R $\alpha$ 1 Is Exclusively Translated in Neuronal Dendrites after iLTP**

(A) Newly synthesized dendritic  $\alpha$ 1, labeled by puro-PLA in neurons expressing anti-miRCon or anti-miR376c, under control conditions or 90 min post-iLTP induction. Graphs show puro- $\alpha$ 1 puncta density or integrated intensity. Scale bar, 5  $\mu$ m; n = 18 cells per condition.

(B) As in (A), showing representative somata. Scale bar, 5  $\mu$ m; n = 18 cells per condition.

(C) As in (A), for miRCon or miR376c expression; n = 18 cells per condition.

(D) As in (B), for miRCon or miR376c; n = 18 cells per condition.

All values represent mean  $\pm$  SEM. \*p < 0.05 and \*\*p < 0.01, two-way ANOVA, Bonferroni post hoc test.

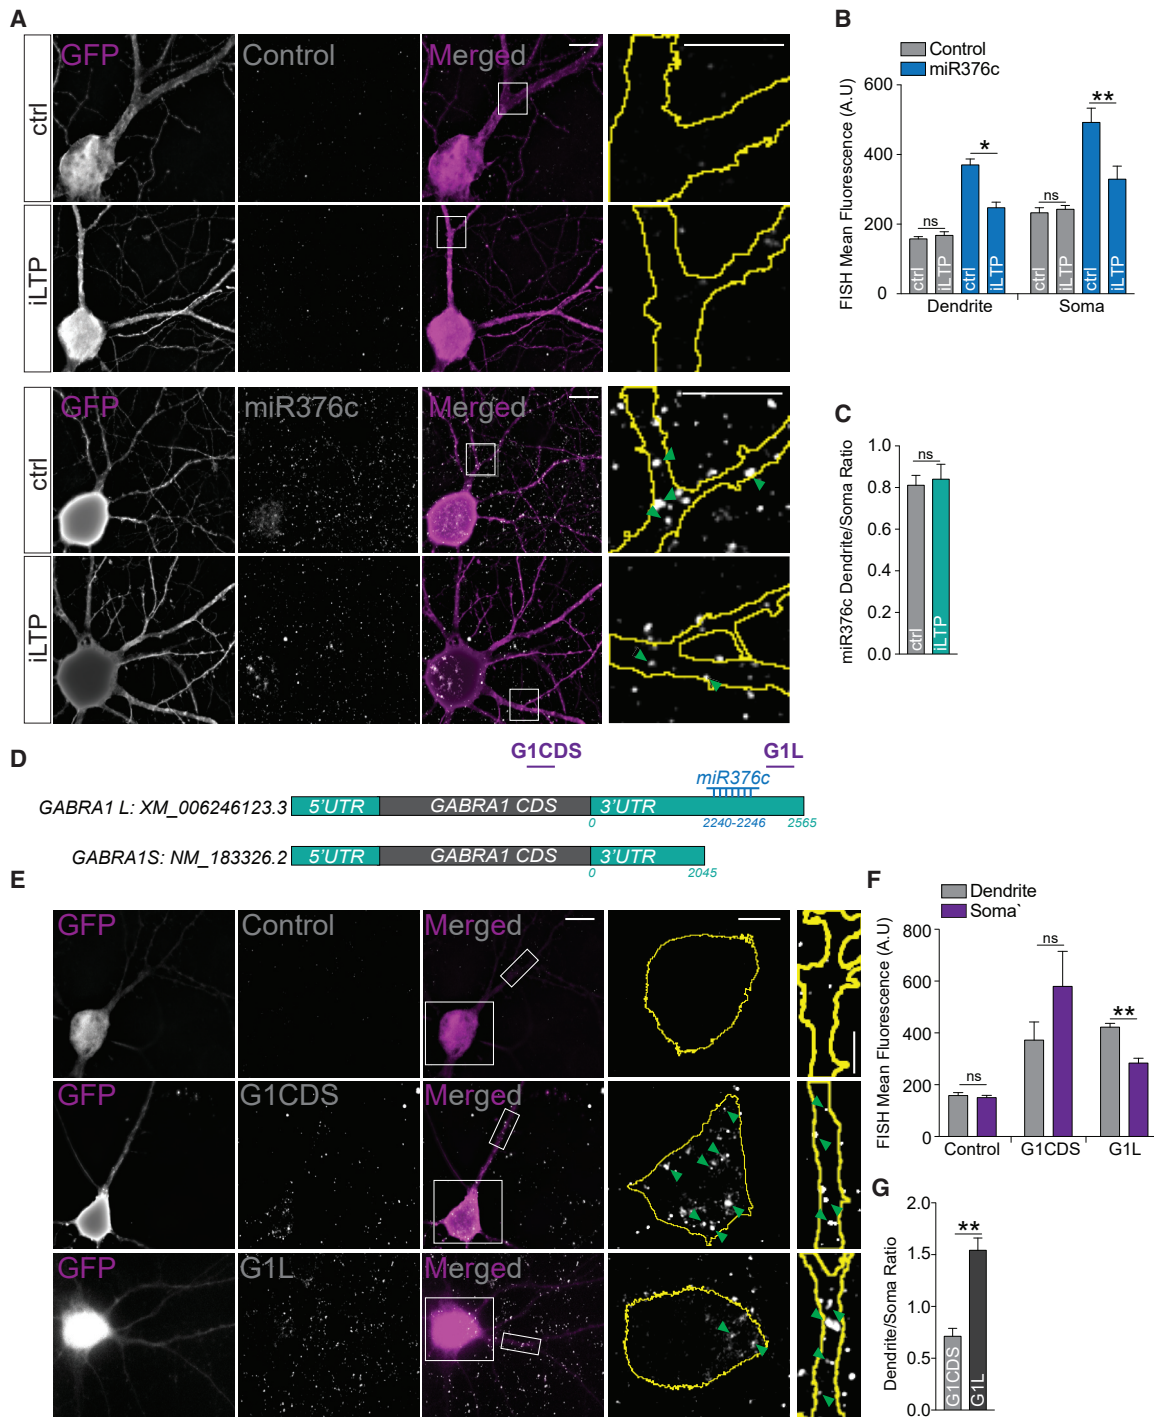

**Figure 6. miR376c Represses Dendritically Enriched *GABRA1* mRNA**

(A) Neurons labeled with double digoxigenin control or miR376c FISH detection probes in control conditions or 90 min post-iLTP induction. Magnifications of dendritic segments are from boxes in merged images. Scale bars, 10  $\mu$ m for whole images and 5  $\mu$ m for magnifications.

(B) Mean FISH signals in soma and dendrites from (A); n = 13–21 cells per condition.

(C) Dendrite/soma ratio of miR376c labeling; n = 13–21 cells per condition.

(D) Schematic of *GABRA1* mRNAs with NCBI accession numbers. The relative position of the LNA FISH probes G1CDS and G1L are shown in purple.

(E) Neurons labeled with double digoxigenin control, G1CDS or G1L FISH detection probes. Magnification of somatic and dendritic segment from boxed areas in merged images are shown. Scale bars, 10  $\mu$ m for whole images and 5  $\mu$ m for magnifications.

(legend continued on next page)

primarily in the dendrites. In comparison, overexpression of miR376c reduced dendritic puro- $\alpha$ 1 labeling in dendrites under basal conditions and blocked the iLTP-induced increase in dendritic puro- $\alpha$ 1 (Figure 5C), but had no effect on somatic levels of puro- $\alpha$ 1 (Figure 5D), showing that miR376c does not regulate translation of somatic *GABRA1* and that increased *de novo*  $\alpha$ 1 synthesis following iLTP is restricted to dendrites.

### miR376c Targets a Dendritically Localized *GABRA1* mRNA Variant

As our data suggest that miR376c silences *GABRA1* in dendrites, we then asked whether miR376c was present in the dendritic compartment. We assessed the neuronal localization of miR376c using miRNA fluorescent *in situ* hybridization (FISH) using double-labeled digoxigenin locked-nucleic acid (LNA) probes. In agreement with the above puro-PLAs, we observed robust labeling of miR376c in the dendrites; however, we also detected miR376c in the soma (Figure 6A). Consistent with our qRT-PCR data, the miR376c FISH signal decreased in both dendritic and somatic compartments at 90 min post-iLTP induction, whereas the control probe signal was not altered (Figures 6A and 6B). We observed no change in the ratio of dendritic to somatic labeling of miR376c following iLTP, indicating this miRNA is not re-distributed following stimulation (Figures 6A and 6C).

Our data suggest that although miR376c is present in both the soma and dendrites, miR376c-*GABRA1* silencing is restricted to the dendrites, pointing to potentially unique mechanisms regulating *GABRA1* translation in each compartment. For instance, distinct *GABRA1* variants may exist that are differentially targeted by miR376c. To explore this, we screened databases for *GABRA1* mRNAs and identified a transcript with a truncated 3' UTR, presumably through the use of an alternative polyadenylation signal, and therefore lacks the miR376c seed site (Figure 6D). To determine whether this shorter *GABRA1* (*GABRA1S*) has differential localization compared with its longer counterpart (*GABRA1L*), we used LNA FISH to delineate differences in their subcellular localization. We created a FISH probe to the *GABRA1* coding sequence (G1CDS) to detect all *GABRA1* variants and a FISH probe to a region downstream of the miR376c seed site (G1L) to detect only *GABRA1L* (Figure 6D). Our FISH experiments revealed that the G1CDS probe strongly labeled the soma and dendrites, whereas the G1L probe predominantly labeled the dendrites (Figures 6E and 6F). Dendritic/somatic ratios demonstrated that G1CDS displayed somatic enrichment, while G1L was significantly enriched in the dendrites (Figure 6G). Together with our local translation assays, these data strongly indicate that *de novo*  $\alpha$ 1 synthesis increases specifically in dendrites following iLTP and is likely due to miR376c-dependent repression of a dendritically enriched *GABRA1* variant.

### iLTP Induces Rapid Transcriptional Repression and Turnover of miR376c

The downregulation of miR376c is key in maintaining increased GABA<sub>A</sub>R expression and synaptic clustering following iLTP in-

duction. But what mechanisms lead to iLTP-induced miR376c downregulation? To determine whether miR376c downregulation could be due to transcriptional repression of the miR376c gene, we used qRT-PCR to assess levels of its primary transcript (pri-miR376c) following iLTP stimulation. Pri-miR376c levels were significantly decreased by ~40% at 10 min and by ~60% at 90 min post-iLTP induction (Figure 7A), with no change in the levels of mature or primary forms of miR379 and miR410 (two miRNAs within the same gene cluster as miR376c) following iLTP-induction (Figures S6A and 7A). These data indicate that transcription of pri-miR376c is reduced following stimulation. To definitively show that transcriptional repression could account for a rapid reduction in mature miR376c, we treated hippocampal neurons with actinomycin D (ActD) for 10, 20, 45, and 90 min to inhibit transcription and found that mature miR376c levels significantly decreased by 25% following 10 min exposure to ActD and by 60% after 90 min exposure (Figure 7B). In comparison, miR379 and miR410 levels decreased significantly less over this same timescale (Figure 7B). Thus, miR376c undergoes rapid turnover, and its abundance and function are likely to be highly dependent on the continued transcription and processing of pri-miR376c.

### A Calcineurin-Dependent Pathway Reduces miR376c Expression after iLTP Induction

As iLTP induction involves Ca<sup>2+</sup> influx through activated NMDARs (Petrini et al., 2014), we hypothesized that Ca<sup>2+</sup> signaling through plasticity enzymes is likely to be upstream of increased *de novo* synthesis of  $\alpha$ 1 and  $\gamma$ 2 following iLTP. To investigate this, we induced iLTP in the presence of the intracellular Ca<sup>2+</sup> chelator BAPTA-AM (20  $\mu$ M) or drugs that either inhibit calcineurin (CaN; CsA 5  $\mu$ M or FK506 5  $\mu$ M) or Ca<sup>2+</sup>/calmodulin-dependent protein kinase II (CaMKII; TAT-CN21 5  $\mu$ M), two key signaling enzymes that initiate the major NMDAR-dependent excitation-transcription (E-T) coupling pathways (Barbado et al., 2009; Hagenston and Bading, 2011). BAPTA-AM and CaN inhibitors blocked the upregulation of  $\alpha$ 1 and  $\gamma$ 2 protein levels following iLTP stimulation (Figures 7C, 7D, S6B, and S6C), whereas CaMKII inhibition had no effect. Furthermore, Ca<sup>2+</sup> chelation and CaN inhibition blocked the iLTP response of the Luc-*GABRA1*<sup>WT</sup> and Luc-*GABRG2*<sup>WT</sup> reporters (Figures 7E and S6D). Together these data show that CaN-dependent signaling pathways are essential for promoting *de novo* synthesis of  $\alpha$ 1 and  $\gamma$ 2 subunits via the regulation of their 3' UTRs. CaN inhibition also prevented downregulation of both the mature and pri-miR376c following iLTP (Figures 7F and 7G), suggesting that CaN is important in transcriptional repression of miR376c gene. To determine if CaN signaling directly affects miR376c transcription, we fused the "putative" promoter region of miR376c (500 bp upstream of pre-miR376c) to luciferase, to generate a miR376c<sup>Prom-WT</sup>-Luc reporter construct that would provide a readout of miR376c transcriptional activity. miR376c<sup>Prom-WT</sup>-Luc had ~5-fold increase in Luc activity compared with an empty luciferase vector with no functional promoter, suggesting that a

(F) Mean FISH signals from the soma and dendrites from (E); n = 12–16 cells per condition.

(G) Dendrite/soma ratio of G1CDS and G1L labeling showing dendritic enrichment of G1L; n = 12–16 cells per condition.

All values represent mean  $\pm$  SEM. \*p < 0.05 and \*\*p < 0.01, t test (B, C, F, and G).

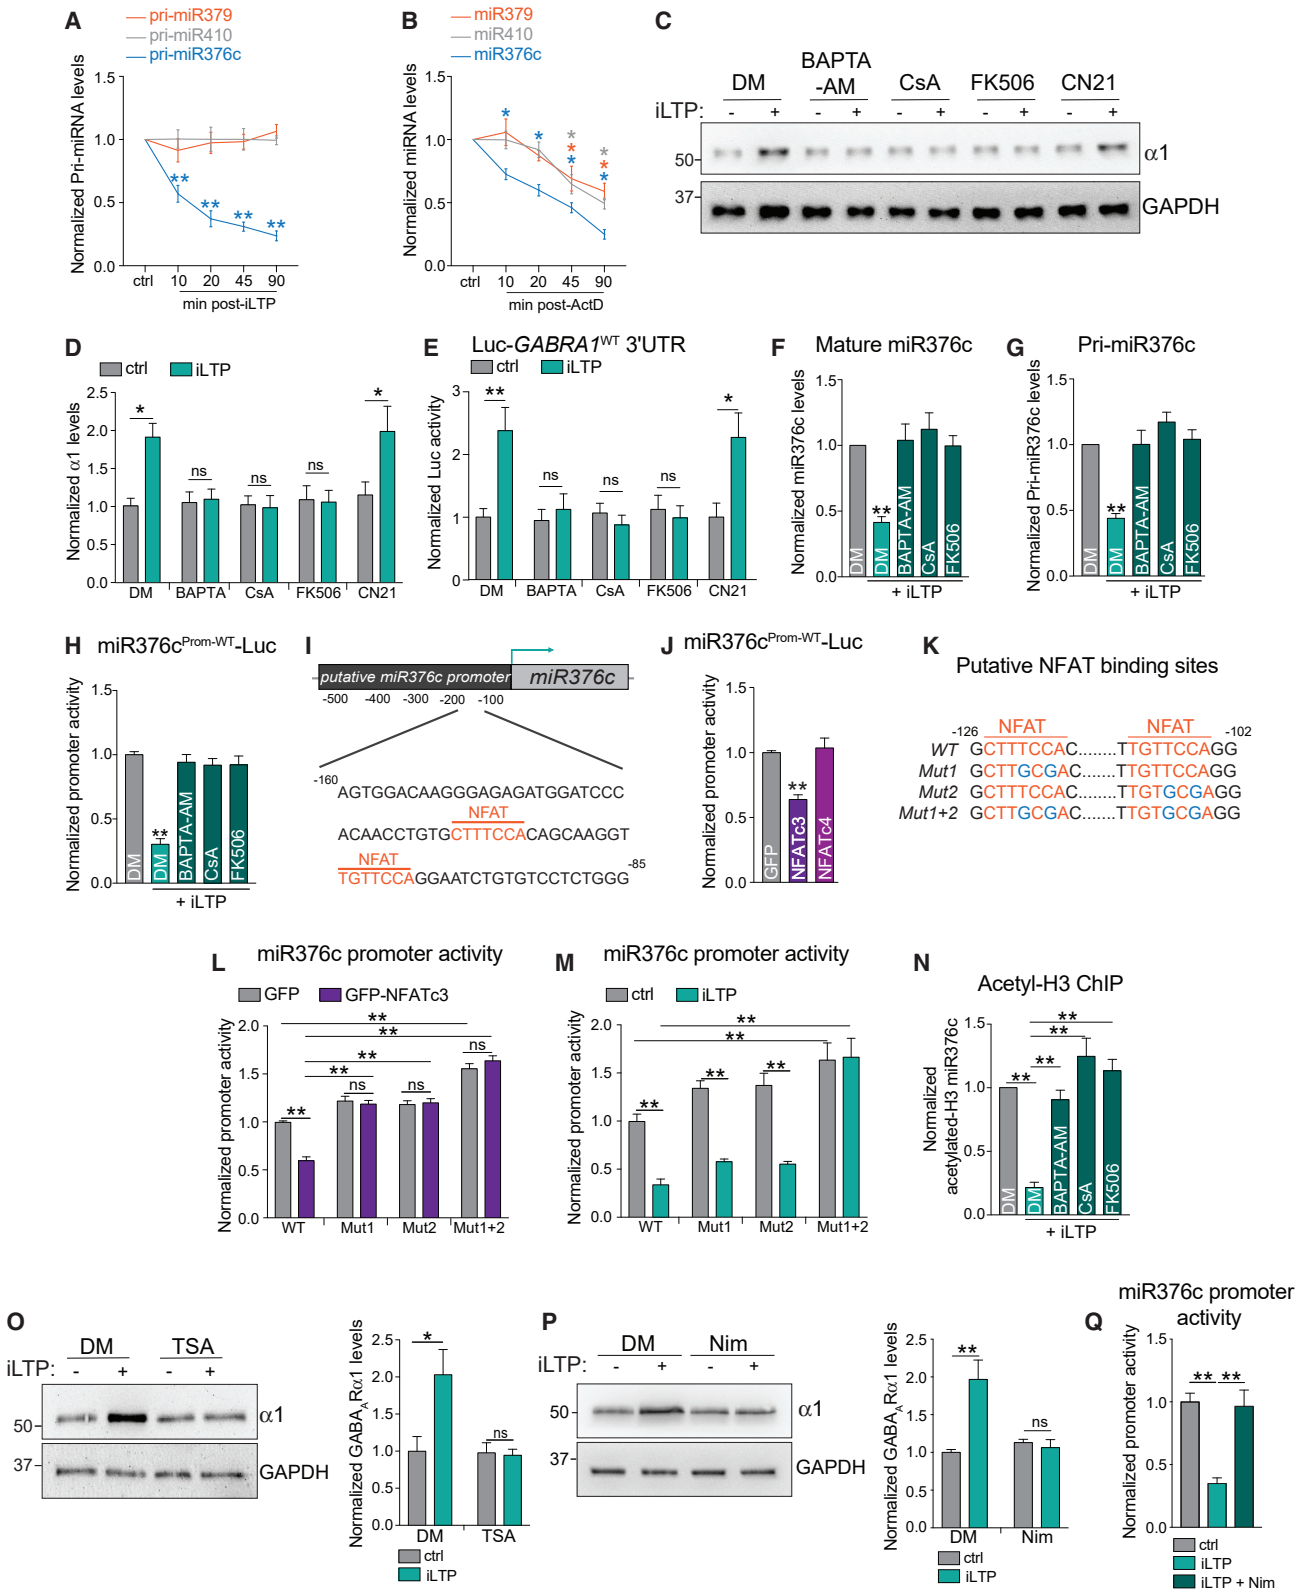

(legend on next page)

promoter region is located within these 500 bp (Figure S6E). At 90 min post-iLTP induction, we observed a ~70% reduction in miR376c<sup>Prom-WT</sup>-Luc activity, which was fully blocked by BAPTA-AM, CsA, or FK506 application (Figure 7H), indicating that iLTP-induced CaN signaling reduces miR376c expression through repression of the miR376c promoter.

### NFATc3 and HDACs Repress miR376c Transcription after iLTP Induction

A major downstream target of CaN is the nuclear factor of activated T cells (NFAT) family of transcription factors, which translocate to the nucleus and induce activity-dependent transcriptional changes (Kipanyula et al., 2016). As the transcriptional repression of miR376c was dependent on CaN activity, we reasoned that NFATs might mediate miR376c transcriptional repression following iLTP. We identified two putative NFAT binding sites in the miR376c promoter region, located at –125 and –109 upstream of the pre-miR376c coding region (Figure 7I). Co-expression of miR376c<sup>Prom-WT</sup>-Luc with GFP-NFATc3 or GFP-NFATc4 (the most highly expressed hippocampal isoforms; Ulrich et al., 2012; Wild et al., 2019) revealed that only GFP-NFATc3 reduced transcriptional reporter activity by ~40%, compared with a GFP control suggesting that NFATc3 may negatively regulate miR376c transcription. In agreement, live imaging revealed increased nuclear localization of GFP-NFATc3 within 10 min of iLTP induction (Figures S6F and S6G). If NFATc3 is a transcriptional repressor of miR376c, disrupting its binding sites within the miR376c promoter should increase the activity of miR376c<sup>Prom-WT</sup>-Luc. Therefore, we mutated the NFAT binding sites individually (miR376c<sup>Prom-Mut1</sup>-Luc and miR376c<sup>Prom-Mut2</sup>-Luc), in addition to creating a construct with both sites mutated (miR376c<sup>Prom-Mut1+2</sup>-Luc; Figure 7K). GFP-NFATc3 overexpression only repressed activity of the WT reporter, indicating both NFAT binding sites are functional in negatively regulating miR376c transcription (Figure 7L). To test the involvement of both binding sites in miR376c repression following iLTP, we compared activity of all three mutant reporters

to the activity of the WT in neurons 90 min post-iLTP induction. The activities of both the single mutants were reduced to similar levels as the WT reporter following iLTP (Figure 7M), whereas miR376c<sup>Prom-Mut1+2</sup>-Luc activity was completely insensitive to transcriptional changes following stimulation (Figure 7M). These data demonstrate that NFATc3 can transcriptionally repress miR376c by associating with a single binding site in the miR376c promoter following iLTP induction.

Next we asked how NFATc3 represses miR376c transcription. NFAT proteins interact with HDACs and recruit them to reduce transcription of specific genes in non-neuronal systems (Baksh et al., 2002; Choo et al., 2009). Furthermore, miR376c expression is regulated by the acetylation status of its promoter (Iwaki et al., 2013; Zehavi et al., 2012). Therefore, to determine whether the miR376c promoter is de-acetylated following iLTP (a mark for gene silencing), we performed chromatin immunoprecipitation (ChIP) assays to assess the interaction between acetylated histone H3 and the miR376c promoter. qPCR of acetylated miR376c promoter DNA revealed reduced levels of acetylated H3 histones associated with the miR376c promoter following iLTP, and this effect was blocked by BAPTA-AM or CaN inhibitors (Figure 7N), suggesting the miR376c promoter is de-acetylated by HDACs in a CaN-dependent manner, following iLTP. To assess the involvement of HDACs in GABA<sub>A</sub>R translation during iLTP, we pre-treated neurons with Trichostatin A (TSA; 1 μm) to block class I and II HDACs. TSA attenuated the synthesis of α1 and γ2 subunits following iLTP stimulation, but not in control conditions (Figures 7O and S6H); demonstrating that HDACs promote the GABA<sub>A</sub>R protein synthesis that is required for sustained iLTP.

How might signaling in dendrites be rapidly transmitted to somatic NFATc3 and HDACs to induce the repression of miR376c in the nucleus? NFATc3 translocation to the nucleus is dependent on the activation of L-type Ca<sup>2+</sup> channels (LTCCs) in response to NMDAR activation in distal dendrites (Murphy et al., 2014; Wild et al., 2019). We asked whether LTCCs might also rapidly transmit signals in the dendrites to repress

### Figure 7. miR376c Is Downregulated through a CaN-NFATc3-HDAC Pathway after iLTP

- (A) qRT-PCR showing levels of primary miRNAs following iLTP induction; n = 4.  
 (B) qRT-PCR showing levels of mature miRNAs following actinomycin-D (ActD) treatment; n = 4.  
 (C) Levels of GABA<sub>A</sub>Rα1 from neurons under control conditions and at 90 min post-iLTP-induction, in the presence of DMSO (DM), BAPTA-AM, CsA, FK506, or TAT-CN21 (CN21).  
 (D) Quantification of α1 levels from (C); n = 6.  
 (E) Luc-GABRA1<sup>WT</sup> activity in neurons under control conditions and at 90 min post-iLTP induction, in the presence of DM, BAPTA-AM, CsA, or FK506; n = 8.  
 (F) qRT-PCR showing levels of mature miR376c 90 min post-iLTP induction with the inhibitors used in (E); n = 5.  
 (G) qRT-PCR showing levels of pri-miR376c 90 min post-iLTP induction with the inhibitors used in (E); n = 5.  
 (H) Putative miR376c promoter reporter (miR376c<sup>Prom-WT</sup>-Luc) activity with the inhibitors used in (E); n = 3.  
 (I) Predicted NFAT binding sites in the putative miR376c promoter are shown in orange.  
 (J) GFP-NFATc3 expression significantly reduces miR376c<sup>Prom-WT</sup>-Luc activity; n = 3.  
 (K) Schematic showing mutations introduced into miR376c<sup>Prom-WT</sup>-Luc (blue).  
 (L) Putative miR376c<sup>Prom</sup> reporter activity in neurons expressing GFP or GFP-NFATc3; n = 3.  
 (M) miR376c<sup>Prom</sup> reporter activity in control conditions and 90 min post-iLTP induction; n = 4.  
 (N) qPCR readout of acetyl-histone H3 chromatin immunoprecipitation (ChIP) from neurons to show the acetylation status of the miR376c promoter with the inhibitors used in (E); n = 4.  
 (O) Trichostatin A (TSA) inhibits iLTP-induced upregulation of α1; n = 6.  
 (P) Nimodipine (Nim) inhibits iLTP-induced upregulation of α1; n = 3.  
 (Q) Nim blocks the iLTP-induced decrease of miR376c<sup>Prom-WT</sup>-Luc activity; n = 3.  
 All values represent mean ± SEM. \*p < 0.05 and \*\*p < 0.01, one-way ANOVA, Bonferroni post hoc test (A, B, F, G, J, O, and P) and two-way ANOVA, Bonferroni post hoc test (D, E, L-N, and Q).

iLTP-induced miR376c transcription and ultimately increase *de novo* synthesis of  $\alpha 1$  and  $\gamma 2$ . Following iLTP, *de novo* synthesis of  $\alpha 1$  and  $\gamma 2$  was attenuated by the LTCC antagonist nimodipine (10  $\mu$ M), as was the reduced reporter activity of miR376c<sup>Prom-WT</sup>-Luc (Figures 7P, 7Q, and S6I). These data demonstrate that LTCCs are crucial for mediating the iLTP-dependent transcriptional repression of miR376c and increased GABA<sub>A</sub>R synthesis.

Together, these experiments demonstrate that an LTCC-CaN-NFATc3-HDACs axis, activated by NMDARs, results in the de-acetylation of the miR376c promoter following iLTP-induction. De-acetylation inhibits transcription of miR376c, leading to the rapid clearance of mature miR376c over time and thereby enhancing *GABRA1* and *GABRG2* protein translation in neuronal dendrites (Figure S7).

## DISCUSSION

### miRNA Regulation of Inhibitory Synapses

Continuous protein synthesis and turnover influences the composition of the synaptic proteome. miRNAs can dictate the rate of mRNA translation, and their activity can modify synaptic protein content, which controls synaptic transmission and plasticity (Schratt, 2009). We have identified miR376c as a translational repressor of *GABRA1* and *GABRG2*, which encode for synaptic  $\alpha 1$  and  $\gamma 2$  subunits and assemble to form one of the most commonly found hippocampal synaptic GABA<sub>A</sub>R subtypes (Pirker et al., 2000). Overexpression of miR376c reduced GABA<sub>A</sub>R surface clustering, synapse numbers, and mIPSCs. On induction of iLTP, miR376c levels were reduced over a 90 min time period, relieving miR376c-dependent translational repression of *GABRA1* and *GABRG2*, leading to increased *de novo*  $\alpha 1$  and  $\gamma 2$  protein synthesis and maintaining potentiated surface clustering of GABA<sub>A</sub>Rs. Through analysis of pri-mi376c levels and use of ActD, we discovered that the iLTP-induced downregulation of miR376c is due primarily to reduced transcription of the miR376c gene, likely accompanied by rapid cytoplasmic clearance of mature miR376c. Our ActD experiment revealed that miR376c exhibits a short half-life (~45 min) compared with other neuronal miRNAs. This is consistent with miRNAs studied in the retina and human brain that have very short half-lives, enabling their abundance to be quickly altered in response to changes in neuronal activity (Krol et al., 2010; Rügger and Grobhans, 2012; Sethi and Lukiw, 2009).

The upregulation of synaptic GABA<sub>A</sub>Rs by reduced miR376c-mediated translational repression is likely one of numerous mechanisms that are involved in the persistent potentiation of inhibitory synapses. We show that although iLTP-dependent control *GABRA1* translation via its 3' UTR is dependent primarily on the activity of miR376c, control of *GABRG2* translation is not exclusively mediated by miR376c and may be regulated by additional post-transcriptional mechanisms, such as other miRNAs or RNA binding proteins. Furthermore, gephyrin expression is also increased at 45 and 90 min following iLTP stimulation in a miR376c-independent manner, again suggesting other post-transcriptional events must control gephyrin expression. Notably, miR376c inhibition with anti-miR376c increased total protein expression levels of  $\alpha 1$  and  $\gamma 2$ , but not surface

GABA<sub>A</sub>R clustering or mIPSCs. Correct GABA<sub>A</sub>R clustering at synapses also requires upregulation of other subunits and proteins to produce correctly assembled and synaptically expressed receptors; therefore, sequestration of miR376c to induce increased  $\alpha 1$  and  $\gamma 2$  expression is not sufficient to mimic iLTP. Moreover, increased expression of synaptic gephyrin is also required to potentiate inhibitory synapses during iLTP (Pettrini et al., 2014). As gephyrin expression is insensitive to miR376c inhibition, we conclude that without increased gephyrin expression, anti-miR376c would have little effect on surface GABA<sub>A</sub>R clustering. These anti-miR376c experiments strongly indicate that other mechanisms must exist (including translational repression by other miRNAs), to upregulate key inhibitory synaptic proteins following iLTP stimulation. Further work is needed to determine these molecular mechanisms and how they may cooperate to potentiate inhibitory synapses during the long-term expression of iLTP.

### Local Protein Synthesis of GABA<sub>A</sub>Rs during the Expression of iLTP

Inhibitory synapses have great capacity for plasticity, but little is known about how local protein synthesis mechanisms might contribute to their plasticity. Multiple studies have demonstrated that iLTP stimulation leads to increased GABA<sub>A</sub>R clustering, inhibitory synapse density, and GABAergic currents within a 20 min time period (Chiu et al., 2018; Marsden et al., 2007; Pettrini et al., 2014). Within this time range, increased synaptic surface GABA<sub>A</sub>R clusters arise from increased GABA<sub>A</sub>R exocytosis and their immobilization at synaptic sites (Marsden et al., 2007; Pettrini et al., 2014). We extend these findings by showing that iLTP-induced enhancement of inhibitory synaptic transmission is persistent and maintained for 90 min following stimulation (Figures 1A and 1B). Furthermore, CHX abolished the iLTP-dependent increase in surface GABA<sub>A</sub>R clustering at 90 min, but not 20 or 45 min following stimulation. These findings indicate that previously described trafficking events likely govern the increase in surface and synaptic GABA<sub>A</sub>R expression at early time points of iLTP expression, but protein translation is required to maintain potentiated GABA<sub>A</sub>R clustering over the long term (Figure S7). At 20 min post-stimulation, we detect an ~40% reduction in mature miR376c expression, which likely releases translational repression of *GABRA1* and *GABRG2* mRNA, giving rise to their subsequent increase in protein expression. GABA<sub>A</sub>R subunits can be translated, assembled into receptors, and inserted into the membrane within ~15 min (Joshi et al., 2013; Saliba et al., 2012), therefore this timescale implies that as long as translational de-repression occurs within the first 40 min of stimulation, there is time for newly synthesized receptors to reach and potentiate synapses.

Recent sequencing data show that key GABA<sub>A</sub>R subunit mRNAs are found in hippocampal neuropil (Cajigas et al., 2012) and therefore are likely to be locally translated in dendrites. Although *GABRA1* and miR376c are present in the soma and dendrites, our FISH experiments indicate that *GABRA1* variants harboring the miR376c seed site are dendritically enriched (Figure 6). Therefore, only *GABRA1* variants enriched in neuronal dendrites are specifically de-repressed and locally translated following iLTP, leading to upregulation of surface GABA<sub>A</sub>Rs in

the dendrites, but not in the soma. This model matches well with our detection of *de novo* synthesis of  $\alpha 1$  subunits in dendrites using puro-PLA assays and imaging data showing that dendritic GABA<sub>A</sub>R clusters are exclusively upregulated following iLTP stimulation in a miR376c-dependent manner, with no effect on somatic clusters. We suspect that  $\gamma 2$  is also locally translated in dendrites during iLTP expression and that other GABA<sub>A</sub>R subunits might be locally translated during other modes of plasticity. Interestingly, the longer 3' UTR variant of *GABRA1* may also contain motifs that are absent from the shorter variant, possibly enabling association with specific RBPs involved in dendritic targeting (Schieweck and Kiebler, 2019). Altogether, dendrite-specific miR376c-dependent enhancement in surface GABA<sub>A</sub>R clustering is in agreement with recent work demonstrating that iLTP stimulation specifically potentiates somatostatin-positive, dendritic GABAergic synapses and not those located in the somatic region (Chiu et al., 2019) and supports the idea that local translation mechanisms may participate in regulating specific subtypes of inhibitory synapses.

### E-T Coupling of miRNAs

We define a signaling pathway that links NMDAR stimulation in dendrites to transcriptional repression of a miRNA in the nucleus. By measuring the activity of the miR376c “putative” promoter, we found that Ca<sup>2+</sup>, CaN activity, and LTCC activity were required to mediate the iLTP-induced transcriptional repression of miR376c and for mediating the overall upregulation of  $\alpha 1$  and  $\gamma 2$  protein levels. We also demonstrate that NFATc3 is a transcriptional repressor of the miR376c gene, as mutating both the predicted NFAT binding sites within miR376c<sup>Prom</sup>-Luc increased transcriptional reporter activity following iLTP, while overexpression of NFATc3 reduced basal reporter activity. Moreover, GFP-NFATc3 translocates to the nucleus within the time frame required to induce transcriptional repression of miR376c following iLTP stimulation. Many E-T signaling pathways depend on LTCCs to communicate synaptic signaling in dendrites to transcriptional regulation in the nucleus (Deisseroth et al., 2003). This includes dendritic NMDAR activity to somatic CaN-NFAT, promoting NFAT translocation to the nucleus (Wild et al., 2019). Our experiments now place these critical regulators of E-T coupling within the context of iLTP stimulation and miR376c regulation, and introduce HDACs as an additional component required for NFAT-mediated transcriptional repression in neurons.

miR376c is located within the miR379-410 gene cluster, and miRNAs from this cluster are thought to be transcribed from a single promoter (Fiore et al., 2009). However, we find that miR376c is independently downregulated following iLTP stimulation (compared with other miRNAs within the miR379-410 gene cluster), indicating that in this context, miR376c is likely transcribed from an alternative and independent promoter. As the precise transcriptional start site of miR376c is unknown, we reasoned that the 500 bp immediately upstream of the pre-miR376c genomic sequence would likely contain a promoter region and dubbed it a “putative” promoter. Indeed, this region possesses promoter-like activity (Figure S6E) and contains functional NFAT binding sites. Further work is needed to fully characterize the miR376c promoter and define additional regulatory el-

ements that may govern miR376c transcription. Here, we also reveal a mechanism whereby the acetylation state of the miR376c gene, determined by HDAC activity, leads to subsequent changes in  $\alpha 1$  and  $\gamma 2$  expression. This suggests that iLTP stimulation can lead to de-acetylation of the miR376c gene, thus promoting a more condensed DNA structure that prevents miR376c transcription. As CaN inhibitors block miR376c gene de-acetylation, and NFAT-HDAC de-acetylation mechanisms of gene repression have been reported in non-neuronal cells (Baksh et al., 2002; Choo et al., 2009), we anticipate that NFATs and HDACs may also play a significant role in regulating activity-dependent gene repression in neurons. Future work will investigate these processes, as they may represent a more general gene repression mechanism with importance for many types of activity-dependent neuronal processes.

We experimentally demonstrate a role for NFAT in miRNA transcriptional regulation, opening up potential avenues by which NFAT signaling could broadly direct the expression levels of multiple groups of proteins in response to different types of neuronal activity. For instance, the same NMDAR stimulation simultaneously leads to iLTP, excitatory LTD, and the up- and downregulation of numerous miRNAs (Hu et al., 2014). Thus, we predict that NFAT signaling may function in both activating and repressing an array of miRNAs that could regulate and co-ordinate protein expression to maintain multiple modes of long-term plasticity.

In summary, we have defined a local, miRNA-dependent translational mechanism that increases *de novo* synthesis of GABA<sub>A</sub>R in dendrites, to maintain long-term surface GABA<sub>A</sub>R clustering during the expression of iLTP. Further characterization of miRNA pathways that regulate different types of inhibitory synaptic plasticity are now needed to paint a detailed picture of how translational control of GABAergic synaptic proteins can shape inhibition. Modulating miRNA levels may allow fine-tuning of E/I balance in neuronal circuits and potentially aid in restoring neuronal function in disorders associated with defects in neuronal inhibition.

### STAR★METHODS

Detailed methods are provided in the online version of this paper and include the following:

- KEY RESOURCES TABLE
- RESOURCE AVAILABILITY
  - Lead Contact
  - Materials Availability
  - Data and Code Availability
- EXPERIMENTAL MODEL AND SUBJECT DETAILS
  - Dissociated Hippocampal Cultures
- METHOD DETAILS
  - DNA constructs
  - Drug treatments
  - AAV production and infections
  - Transfections
  - Immunofluorescence microscopy
  - Fluorescent *in situ* hybridization (FISH)
  - Puromycin-Proximity Ligation Assays (Puro-PLA)



- Live Imaging
- Whole cell electrophysiology
- RNA isolation and qRT-PCR
- Ago2 RNA-IP
- Western blotting
- Surface biotinylation
- Luciferase assays
- Acetyl-Histone H3 chromatin immunoprecipitation (ChIP)

● **QUANTIFICATION AND STATISTICAL ANALYSIS**

**SUPPLEMENTAL INFORMATION**

Supplemental Information can be found online at <https://doi.org/10.1016/j.celrep.2020.107785>.

**ACKNOWLEDGMENTS**

We are grateful to Dr. Brooke Sinnen for help with making adeno-associated viruses (AAVs), Dr. Joshua Black for sharing equipment, Dr. Ulli Bayer for providing CN21, and Sara Gookin for technical support. We thank Drs. Kevin Crosby and Matthew Kennedy for critical reading of the manuscript. This work was supported by a Brain and Behavior Research Foundation NARSAD Young Investigator Award, a Brain Research Foundation Seed Grant, an AHA Career Development Award, NIH/National Institute of Mental Health (NIMH) grant R01MH119154 to K.R.S., and NIH/National Institute of Neurological Disorders and Stroke (NINDS) grant R01NS040701 and NIH/NIMH grant R01MH102338 to M.L.D. J.D.G. was supported by grant T32GM763540 and an AHA Predoctoral Fellowship. T.M.W. was supported by T32 NS099042. A.M.P. was supported by NIH/NINDS grant F31NS096815.

**AUTHOR CONTRIBUTIONS**

Conceptualization, D.R. and K.R.S.; Experiments and Analysis, D.R., A.M.P., J.L.S., T.M.W., and J.D.G.; Writing – Original Draft, D.R.; Writing – Review & Editing, D.R., M.L.D., and K.R.S.; Supervision, M.L.D. and K.R.S.; Funding Acquisition, M.L.D. and K.R.S.

**DECLARATION OF INTERESTS**

The authors declare no competing interests.

Received: October 3, 2019

Revised: April 14, 2020

Accepted: May 28, 2020

Published: June 23, 2020

**REFERENCES**

Aoto, J., Martinelli, D.C., Malenka, R.C., Tabuchi, K., and Südhof, T.C. (2013). Presynaptic neurexin-3 alternative splicing trans-synaptically controls post-synaptic AMPA receptor trafficking. *Cell* 154, 75–88.

Baksh, S., Widlund, H.R., Frazer-Abel, A.A., Du, J., Fosmire, S., Fisher, D.E., DeCaprio, J.A., Modiano, J.F., and Burakoff, S.J. (2002). NFATc2-mediated repression of cyclin-dependent kinase 4 expression. *Mol. Cell* 10, 1071–1081.

Barbado, M., Fablet, K., Ronjat, M., and De Waard, M. (2009). Gene regulation by voltage-dependent calcium channels. *Biochim. Biophys. Acta* 1793, 1096–1104.

Barberis, A. (2020). Postsynaptic plasticity of GABAergic synapses. *Neuropharmacology* 169, 107643.

Biever, A., Donlin-Asp, P.G., and Schuman, E.M. (2019). Local translation in neuronal processes. *Curr. Opin. Neurobiol.* 57, 141–148.

Cajigas, I.J., Will, T., and Schuman, E.M. (2010). Protein homeostasis and synaptic plasticity. *EMBO J.* 29, 2746–2752.

Cajigas, I.J., Tushev, G., Will, T.J., tom Dieck, S., Fuerst, N., and Schuman, E.M. (2012). The local transcriptome in the synaptic neuropil revealed by deep sequencing and high-resolution imaging. *Neuron* 74, 453–466.

Castillo, P.E., Chiu, C.Q., and Carroll, R.C. (2011). Long-term plasticity at inhibitory synapses. *Curr. Opin. Neurobiol.* 21, 328–338.

Chiu, C.Q., Martenson, J.S., Yamazaki, M., Natsume, R., Sakimura, K., Tomita, S., Tavalin, S.J., and Higley, M.J. (2018). Input-specific NMDAR-dependent potentiation of dendritic GABAergic inhibition. *Neuron* 97, 368–377.e3.

Chiu, C.Q., Barberis, A., and Higley, M.J. (2019). Preserving the balance: diverse forms of long-term GABAergic synaptic plasticity. *Nat. Rev. Neurosci.* 20, 272–281.

Choo, M.K., Yeo, H., and Zayzafoon, M. (2009). NFATc1 mediates HDAC-dependent transcriptional repression of osteocalcin expression during osteoblast differentiation. *Bone* 45, 579–589.

Crosby, K.C., Gookin, S.E., Garcia, J.D., Hahn, K.M., Dell’Acqua, M.L., and Smith, K.R. (2019). Nanoscale subsynaptic domains underlie the organization of the inhibitory synapse. *Cell Rep.* 26, 3284–3297.e3.

Deisseroth, K., Mermelstein, P.G., Xia, H., and Tsien, R.W. (2003). Signaling from synapse to nucleus: the logic behind the mechanisms. *Curr. Opin. Neurobiol.* 13, 354–365.

Fiore, R., Khudayberdiev, S., Christensen, M., Siegel, G., Flavell, S.W., Kim, T.K., Greenberg, M.E., and Schratt, G. (2009). Mef2-mediated transcription of the miR379-410 cluster regulates activity-dependent dendritogenesis by fine-tuning Pumilio2 protein levels. *EMBO J.* 28, 697–710.

Gross, G.G., Junge, J.A., Mora, R.J., Kwon, H.B., Olson, C.A., Takahashi, T.T., Liman, E.R., Ellis-Davies, G.C., McGee, A.W., Sabatini, B.L., et al. (2013). Recombinant probes for visualizing endogenous synaptic proteins in living neurons. *Neuron* 78, 971–985.

Gu, Q.H., Yu, D., Hu, Z., Liu, X., Yang, Y., Luo, Y., Zhu, J., and Li, Z. (2015). miR-26a and miR-384-5p are required for LTP maintenance and spine enlargement. *Nat. Commun.* 6, 6789.

Hagenston, A.M., and Bading, H. (2011). Calcium signaling in synapse-to-nucleus communication. *Cold Spring Harb. Perspect. Biol.* 3, a004564.

Hu, Z., and Li, Z. (2017). miRNAs in synapse development and synaptic plasticity. *Curr. Opin. Neurobiol.* 45, 24–31.

Hu, Z., Yu, D., Gu, Q.H., Yang, Y., Tu, K., Zhu, J., and Li, Z. (2014). miR-191 and miR-135 are required for long-lasting spine remodeling associated with synaptic long-term depression. *Nat. Commun.* 5, 3263.

Hu, Z., Zhao, J., Hu, T., Luo, Y., Zhu, J., and Li, Z. (2015). miR-501-3p mediates the activity-dependent regulation of the expression of AMPA receptor subunit GluA1. *J. Cell Biol.* 208, 949–959.

Iwaki, J., Kikuchi, K., Mizuguchi, Y., Kawahigashi, Y., Yoshida, H., Uchida, E., and Takizawa, T. (2013). MiR-376c down-regulation accelerates EGF-dependent migration by targeting GRB2 in the HuCCT1 human intrahepatic cholangiocarcinoma cell line. *PLoS ONE* 8, e69496.

Joshi, S., Keith, K.J., Ilyas, A., and Kapur, J. (2013). GABA<sub>A</sub> receptor membrane insertion rates are specified by their subunit composition. *Mol. Cell. Neurosci.* 56, 201–211.

Kipanyula, M.J., Kimaro, W.H., and Seke Etet, P.F. (2016). The emerging roles of the calcineurin-nuclear factor of activated T-lymphocytes pathway in nervous system functions and diseases. *J. Aging Res.* 2016, 5081021.

Klausberger, T., and Somogyi, P. (2008). Neuronal diversity and temporal dynamics: the unity of hippocampal circuit operations. *Science* 321, 53–57.

Krol, J., Busskamp, V., Markiewicz, I., Stadler, M.B., Ribi, S., Richter, J., Duebel, J., Bicker, S., Fehling, H.J., Schübeler, D., et al. (2010). Characterizing light-regulated retinal microRNAs reveals rapid turnover as a common property of neuronal microRNAs. *Cell* 141, 618–631.

Lewis, B.P., Shih, I.H., Jones-Rhoades, M.W., Bartel, D.P., and Burge, C.B. (2003). Prediction of mammalian microRNA targets. *Cell* 115, 787–798.

Luscher, B., Fuchs, T., and Kilpatrick, C.L. (2011). GABA<sub>A</sub> receptor trafficking-mediated plasticity of inhibitory synapses. *Neuron* 70, 385–409.

- Marsden, K.C., Beattie, J.B., Friedenthal, J., and Carroll, R.C. (2007). NMDA receptor activation potentiates inhibitory transmission through GABA receptor-associated protein-dependent exocytosis of GABA(A) receptors. *J. Neurosci.* *27*, 14326–14337.
- McNeill, E., and Van Vactor, D. (2012). MicroRNAs shape the neuronal landscape. *Neuron* *75*, 363–379.
- Murphy, J.G., Sanderson, J.L., Gorski, J.A., Scott, J.D., Catterall, W.A., Sather, W.A., and Dell'Acqua, M.L. (2014). AKAP-anchored PKA maintains neuronal L-type calcium channel activity and NFAT transcriptional signaling. *Cell Rep.* *7*, 1577–1588.
- Nusser, Z., Cull-Candy, S., and Farrant, M. (1997). Differences in synaptic GABA(A) receptor number underlie variation in GABA mini amplitude. *Neuron* *19*, 697–709.
- Olde Loohuis, N.F., Ba, W., Stoerchel, P.H., Kos, A., Jager, A., Schratz, G., Martens, G.J., van Bokhoven, H., Nadif Kasri, N., and Aschrafi, A. (2015). MicroRNA-137 controls AMPA-receptor-mediated transmission and mGluR-dependent LTD. *Cell Rep.* *11*, 1876–1884.
- Petrini, E.M., Ravasenga, T., Hausrat, T.J., Iurilli, G., Olcese, U., Racine, V., Sibarita, J.B., Jacob, T.C., Moss, S.J., Benfenati, F., et al. (2014). Synaptic recruitment of gephyrin regulates surface GABA<sub>A</sub> receptor dynamics for the expression of inhibitory LTP. *Nat. Commun.* *5*, 3921.
- Pirker, S., Schwarzer, C., Wieselthaler, A., Sieghart, W., and Sperk, G. (2000). GABA(A) receptors: immunocytochemical distribution of 13 subunits in the adult rat brain. *Neuroscience* *101*, 815–850.
- Pratt, A.J., and MacRae, I.J. (2009). The RNA-induced silencing complex: a versatile gene-silencing machine. *J. Biol. Chem.* *284*, 17897–17901.
- Rajgor, D. (2018). Macro roles for microRNAs in neurodegenerative diseases. *Noncoding RNA Res.* *3*, 154–159.
- Rajgor, D., Sanderson, T.M., Amici, M., Collingridge, G.L., and Hanley, J.G. (2018). NMDAR-dependent Argonaute 2 phosphorylation regulates miRNA activity and dendritic spine plasticity. *EMBO J.* *37*, e97943.
- Rangaraju, V., Tom Dieck, S., and Schuman, E.M. (2017). Local translation in neuronal compartments: how local is local? *EMBO Rep.* *18*, 693–711.
- Rüegger, S., and Großhans, H. (2012). MicroRNA turnover: when, how, and why. *Trends Biochem. Sci.* *37*, 436–446.
- Saliba, R.S., Kretschmannova, K., and Moss, S.J. (2012). Activity-dependent phosphorylation of GABA<sub>A</sub> receptors regulates receptor insertion and tonic current. *EMBO J.* *31*, 2937–2951.
- Sambandan, S., Akbalik, G., Kochen, L., Rinne, J., Kahlstatt, J., Glock, C., Tushev, G., Alvarez-Castelao, B., Heckel, A., and Schuman, E.M. (2017). Activity-dependent spatially localized miRNA maturation in neuronal dendrites. *Science* *355*, 634–637.
- Schieweck, R., and Kiebler, M.A. (2019). Posttranscriptional gene regulation of the GABA receptor to control neuronal inhibition. *Front. Mol. Neurosci.* *12*, 152.
- Schratt, G. (2009). MicroRNAs at the synapse. *Nat. Rev. Neurosci.* *10*, 842–849.
- Schratt, G.M., Tuebing, F., Nigh, E.A., Kane, C.G., Sabatini, M.E., Kiebler, M., and Greenberg, M.E. (2006). A brain-specific microRNA regulates dendritic spine development. *Nature* *439*, 283–289.
- Sethi, P., and Lukiw, W.J. (2009). Micro-RNA abundance and stability in human brain: specific alterations in Alzheimer's disease temporal lobe neocortex. *Neurosci. Lett.* *459*, 100–104.
- Smith, K.R., and Kittler, J.T. (2010). The cell biology of synaptic inhibition in health and disease. *Curr. Opin. Neurobiol.* *20*, 550–556.
- Smith, K.R., Davenport, E.C., Wei, J., Li, X., Pathania, M., Vaccaro, V., Yan, Z., and Kittler, J.T. (2014). GIT1 and βPIX are essential for GABA(A) receptor synaptic stability and inhibitory neurotransmission. *Cell Rep.* *9*, 298–310.
- Thomas, K.T., Gross, C., and Bassell, G.J. (2018). MicroRNAs sculpt neuronal communication in a tight balance that is lost in neurological disease. *Front. Mol. Neurosci.* *11*, 455.
- Tremblay, R., Lee, S., and Rudy, B. (2016). GABAergic interneurons in the neocortex: from cellular properties to circuits. *Neuron* *91*, 260–292.
- Ulrich, J.D., Kim, M.S., Houlihan, P.R., Shutov, L.P., Mohapatra, D.P., Strack, S., and Usachev, Y.M. (2012). Distinct activation properties of the nuclear factor of activated T-cells (NFAT) isoforms NFATc3 and NFATc4 in neurons. *J. Biol. Chem.* *287*, 37594–37609.
- Wang, W., Kwon, E.J., and Tsai, L.H. (2012). MicroRNAs in learning, memory, and neurological diseases. *Learn. Mem.* *19*, 359–368.
- Wild, A.R., Sinnen, B.L., Dittmer, P.J., Kennedy, M.J., Sather, W.A., and Dell'Acqua, M.L. (2019). Synapse-to-nucleus communication through NFAT is mediated by L-type Ca(2+) channel Ca(2+) spike propagation to the soma. *Cell Rep.* *26*, 3537–3550.e4.
- Wong, N., and Wang, X. (2015). miRDB: an online resource for microRNA target prediction and functional annotations. *Nucleic Acids Res.* *43*, D146–D152.
- Zehavi, L., Avraham, R., Barzilai, A., Bar-Ilan, D., Navon, R., Sidi, Y., Avni, D., and Leibowitz-Amit, R. (2012). Silencing of a large microRNA cluster on human chromosome 14q32 in melanoma: biological effects of mir-376a and mir-376c on insulin growth factor 1 receptor. *Mol. Cancer* *11*, 44.

STAR★METHODS

KEY RESOURCES TABLE

| REAGENT or RESOURCE                                  | SOURCE                   | IDENTIFIER        |
|------------------------------------------------------|--------------------------|-------------------|
| <b>Antibodies</b>                                    |                          |                   |
| Argonaute-2 (IP)                                     | Millipore                | RRID: AB_10695648 |
| Argonaute-2 (WB)                                     | Cell Signaling           | RRID:AB_2096291   |
| Digoxigenin                                          | Jackson ImmunoResearch   | RRID: AB_2339005  |
| GABA <sub>A</sub> R $\alpha$ 1 (PLA)                 | Synaptic systems         | RRID: AB_2232180  |
| GABA <sub>A</sub> R $\alpha$ 1 (WB)                  | NeuroMab                 | RRID: AB_10697873 |
| GABA <sub>A</sub> R $\alpha$ 5                       | NeuroMab                 | RRID: AB_2491075  |
| GABA <sub>A</sub> R $\beta$ 3                        | NeuroMab                 | RRID: AB_10673389 |
| GABA <sub>A</sub> R $\gamma$ 2 (Imaging)             | Synaptic Systems         | RRID: AB_10594245 |
| GABA <sub>A</sub> R $\gamma$ 2 (WB)                  | NeuroMab                 | RRID: AB_2566822  |
| GAPDH                                                | GeneTex                  | RRID: AB_11174761 |
| Gephyrin (Imaging)                                   | Synaptic Systems         | RRID: AB_887717   |
| Gephyrin (WB)                                        | Synaptic Systems         | RRID: AB_887719   |
| GFP                                                  | NeuroMab                 | RRID: AB_10671444 |
| GluA1                                                | Millipore                | RRID: AB_2721164  |
| IgG control                                          | Cell Signaling           | RRID: AB_10829607 |
| LIMK1                                                | Cell Signaling 3842      | RRID: AB_2281332  |
| Puromycin                                            | Kerafast                 | RRID: AB_2620162  |
| VGAT                                                 | Synaptic systems         | RRID: AB_887869   |
| HRP conjugated goat anti-mouse                       | Biorad                   | RRID: AB_11125547 |
| HRP conjugated goat anti-rabbit                      | Biorad                   | RRID: AB_11125142 |
| anti-guinea pig Alexa Fluor-568                      | Life Technologies        | RRID: AB_141954   |
| anti-mouse AlexaFluor-488                            | Life Technologies        | RRID: AB_141607   |
| anti-rabbit AlexaFluor-647                           | Life Technologies        | RRID: AB_2536183  |
| <b>Bacterial and Virus Strains</b>                   |                          |                   |
| AAV-DJ-GFP-miRControl                                | This paper               | N/A               |
| AAV-DJ-GFP-miR376c                                   | This paper               | N/A               |
| <b>Chemicals, Peptides, and Recombinant Proteins</b> |                          |                   |
| Actinomycin D                                        | Tocris                   | Cat #: 1229       |
| BAPTA-AM                                             | Tocris                   | Cat #: 2787       |
| Cycloheximide                                        | Sigma                    | Cat #: C7698      |
| Cyclosporin A                                        | Tocris                   | Cat #: 1101       |
| CNQX                                                 | Tocris                   | Cat #: 1045       |
| FK506                                                | Tocris                   | Cat #: 3631       |
| NBQX                                                 | Tocris                   | Cat #: 0373       |
| Nimodipine                                           | Tocris                   | Cat #: 0600       |
| NMDA                                                 | Tocris                   | Cat #: 0114       |
| Picrotoxin                                           | Tocris                   | Cat #: 1128       |
| Puromycin                                            | Tocris                   | Cat #: 4089       |
| TAT-CN21                                             | Gift from Dr. Ulli Bayer | N/A               |
| Trichostatin                                         | Tocris                   | Cat #: 1406       |
| TTX                                                  | Tocris                   | Cat #: 1078       |

(Continued on next page)

**Continued**

| REAGENT or RESOURCE                                          | SOURCE         | IDENTIFIER       |
|--------------------------------------------------------------|----------------|------------------|
| Critical Commercial Assays                                   |                |                  |
| Dual-luciferase reporter assay system                        | Promega        | Cat #: E1910     |
| EpiQuik Acetyl-Histone H3 ChIP kit                           | EpiGentek      | Cat #: P-2010    |
| miScript II RT kit                                           | QIAGEN         | Cat #: 218160    |
| RNeasy mini kit                                              | QIAGEN         | Cat #: 74104     |
| PIERCE Sulfo-NHS-LC-Biotin                                   | ThermoFisher   | Cat #: PG82075   |
| Pierce NeutrAvidin                                           | ThermoFisher   | Cat #: 29201     |
| PLA mouse/rabbit kit                                         | Sigma          | Cat #: DUO92101  |
| miRCURY LNA miRNA ISH kit                                    | QIAGEN         | Cat #: 339459    |
| Experimental Models: Cell Lines                              |                |                  |
| HEK293T cells                                                | ATCC           | RRID:CVCL_0045   |
| Experimental Models: Organisms/Strains                       |                |                  |
| Rat, Sprague Dawley Charles River                            | Charles Rivers | RRID: RGD_734476 |
| Oligonucleotides                                             |                |                  |
| Luc-GABRA1 3'UTR F: TATATACGAGCTCG<br>TTCTTTTAGTCGTATTCTGTTG | This paper     | N/A              |
| Luc-GABRA1 3'UTR R: ATATATAAC<br>GCGTGACTCGAGTCTAATTGTCT     | This paper     | N/A              |
| Luc-GABRG2 3'UTR F: TATATACG<br>AGCTCGGAGGTTTGGGTTTTATCGA    | This paper     | N/A              |
| Luc-GABRG2 3'UTR R: ATATATAAC<br>GCGTCAGAGAGCAGCTGATGATTA    | This paper     | N/A              |
| GABRA1 376c mut F: TATATACGAGCTCGT<br>TCTTTTAGTCGTATTCTGTTG  | This paper     | N/A              |
| GABRA1 376c mut R: ATATATAACGCG<br>TGACTCGAGTCTAATTGTCT      | This paper     | N/A              |
| GABRG2 376c mut F: F:5'TATATACGAGCTC<br>GGAGGTTTGGGTTTTATCGA | This paper     | N/A              |
| GABRG2 376c mut R: R:5'ATATATAACGCG<br>TCAGAGAGCAGCTGATGATTA | This paper     | N/A              |
| Luc-miR376cPromF: TATATAGAGCTC<br>AGTGCCCATGATGGGCTTT        | This paper     | N/A              |
| Luc-miR376cPromR: TATATAAAGCTTA<br>AGATCTAGTCCTGAAGA         | This paper     | N/A              |
| Luc-miR376cPromMut1 F: ACAACCT<br>GTGCTTGCGACAGCAAGGTTGT     | This paper     | N/A              |
| Luc-miR376cProm Mut1 R: ACAACC<br>TTGCTGTCGCAAGCACAGGTTGT    | This paper     | N/A              |
| Luc-miR376cProm Mut2F: ACAGCAAG<br>GTTGTGCGAGGAATCTGTGTC     | This paper     | N/A              |
| Luc-miR376cProm Mut2R: GACACAGA<br>TTCCTCGACAACCTTGCTGT      | This paper     | N/A              |
| qGABRA1 F: CGGCCATGGACTGGTTTAT                               | This paper     | N/A              |
| qGABRA1 R: GCATACCCTCTCTGGTGAAA                              | This paper     | N/A              |
| qGABRA4 F: CAGACGGAAGATGGGCTATTT                             | This paper     | N/A              |
| qGABRA4 R: GGCTGGAACAGACTCCTTATTG                            | This paper     | N/A              |
| qGABRA5 F: GAATAGGGAGCCCGTGATAAA                             | This paper     | N/A              |
| qGABRA5 R: GACCTCTCTCAGGTTCAATTC                             | This paper     | N/A              |
| qGABRA6 F: CTCTACCCAAAGTGCTCATATGC                           | This paper     | N/A              |
| qGABRA6 R: GGAAGGAGATTGGTGAAGTAG                             | This paper     | N/A              |
| qGABRB3 F: GGGTGTCTTCTGGATCAATTA                             | This paper     | N/A              |

(Continued on next page)

**Continued**

| REAGENT or RESOURCE                                    | SOURCE                             | IDENTIFIER                                                                                                          |
|--------------------------------------------------------|------------------------------------|---------------------------------------------------------------------------------------------------------------------|
| qGABRB3 R: TCTCGAAGGTGAGTGTGATG                        | This paper                         | N/A                                                                                                                 |
| qGABRG2 F: ACTTTACCATCCAGACCTACATTC                    | This paper                         | N/A                                                                                                                 |
| qGABRG2 R: GCAGGGACAGCATCCTTATT                        | This paper                         | N/A                                                                                                                 |
| qGRIA1 F: GCCAGATCGTGAAGCTAGAAA                        | This paper                         | N/A                                                                                                                 |
| qGRIA1 R: CTCCGCTCTCCTTGAACCTTATT                      | This paper                         | N/A                                                                                                                 |
| qpmirrepLucF: TGAAGAAGTGTTCGTCTTCG                     | This paper                         | N/A                                                                                                                 |
| qpmirrepLucR: TATGTCCGGTTATGTAAACA                     | This paper                         | N/A                                                                                                                 |
| qmiR376cF: AACATAGAGGAAATTTACAGT                       | This paper                         | N/A                                                                                                                 |
| qmiR379F: TGGTAGACTAtGGAACGTAGG                        | This paper                         | N/A                                                                                                                 |
| qmiR410F: AATATAACACAGAtGGCCTGT                        | This paper                         | N/A                                                                                                                 |
| qmiR29aF: ACTGATTTCTTTGGTGTTCAG                        | This paper                         | N/A                                                                                                                 |
| qPri-376cF: TCTCTTCAGGACTAGATCTT                       | This paper                         | N/A                                                                                                                 |
| qPri-376cR: TTGACACTGAAAACGTG                          | This paper                         | N/A                                                                                                                 |
| qPri-379F: TTGTGCCTTCATGGGCAGT                         | This paper                         | N/A                                                                                                                 |
| qPri-379R: ATACTGAGAGTTAGTGGACC                        | This paper                         | N/A                                                                                                                 |
| qPri-410F: TGCTCCGGTCAACACTGGGT                        | This paper                         | N/A                                                                                                                 |
| qPri-410R: AAAACAGGCCATCTGTGTTA                        | This paper                         | N/A                                                                                                                 |
| qmiR376cPromF: TGGACAAGGGAGAGATGGA                     | This paper                         | N/A                                                                                                                 |
| qmiR376cPromF: ATGAAGAAGACGGCAGACAG                    | This paper                         | N/A                                                                                                                 |
| Recombinant DNA                                        |                                    |                                                                                                                     |
| pAAV-miR-GFP control                                   | ABM                                | Cat #: AM00100                                                                                                      |
| pAAV-miR376c-GFP                                       | ABM                                | Cat #: Amr107900                                                                                                    |
| GFP-NFATc3                                             | Wild et.al 2019                    | N/A                                                                                                                 |
| GFP-NFATc4                                             | <a href="#">Wild et. al 2019</a>   | N/A                                                                                                                 |
| Gephyrin-FingR-GFP                                     | <a href="#">Gross et al., 2013</a> | Addgene #: 46296                                                                                                    |
| pMIR-REPORT-Luc-GABRA1                                 | This paper                         | N/A                                                                                                                 |
| pMIR-REPORT-Luc-GABRG2                                 | This paper                         | N/A                                                                                                                 |
| pGL4.10-FL-miR376c <sup>Prom-WT</sup> -Luc             | This study                         | N/A                                                                                                                 |
| Software and Algorithms                                |                                    |                                                                                                                     |
| Prism 7                                                | GraphPad                           | <a href="http://www.graphpad.com/scientific-software/prism/">http://www.graphpad.com/scientific-software/prism/</a> |
| ImageJ                                                 | NIH                                | <a href="https://imagej.nih.gov/ij">https://imagej.nih.gov/ij</a>                                                   |
| Other                                                  |                                    |                                                                                                                     |
| Immobilon Classico Western HRP substrate               | Millipore                          | Cat #: WBLU0100                                                                                                     |
| Immobilon Crescendo Western HRP substrate              | Millipore                          | Cat #: WBLUR0500                                                                                                    |
| Lipofectamine 2000                                     | Thermofischer                      | Cat #: 11668027                                                                                                     |
| Protein G Sepharose                                    | Sigma                              | Cat #: P3296                                                                                                        |
| Biotin solution                                        | PIERCE                             | N/A                                                                                                                 |
| miRDIAN Control inhibitor                              | Horizon                            | Cat #: IN-001005-01-05                                                                                              |
| miRDIAN miR376c inhibitor                              | Horizon                            | Cat #: IH-320471-04-0002                                                                                            |
| miRDIAN miR134 inhibitor                               | Horizon                            | Cat #: IH-320365-06-0002                                                                                            |
| LNA miR376c Double DIG probe:<br>AACATAGAGGAAATTTACAGT | QIAGEN                             | Cat #: 339111<br>YD00610516-BCG                                                                                     |
| LNA G1CDS Double DIG probe:<br>TAGCTGGTTGCTGTAGGAGCA   | QIAGEN                             | Cat #: 339500                                                                                                       |
| LNA G1L Double DIG probe:<br>TCCTCTATGAGAGTGATCTT      | QIAGEN                             | Cat #: 339500                                                                                                       |

## RESOURCE AVAILABILITY

### Lead Contact

Further information and requests for resources and reagents should be directed to and will be fulfilled by the Lead Contact, Katharine R. Smith ([katharine.r.smith@cuanschutz.edu](mailto:katharine.r.smith@cuanschutz.edu)).

### Materials Availability

Plasmids generated in this study will be made available on request but we may require a payment and/or a completed Materials Transfer Agreement if there is potential for commercial application

### Data and Code Availability

This study did not generate any unique datasets or code.

## EXPERIMENTAL MODEL AND SUBJECT DETAILS

All animal procedures were conducted in accordance with National Institutes of Health (NIH)–United States Public Health Service guidelines and with the approval of the University of Colorado, Denver, Institutional Animal Care and Use Committee.

### Dissociated Hippocampal Cultures

Rat hippocampal neurons were dissected from postnatal day 1–2 rats and cultures were prepared as previously described (Crosby et al., 2019). Briefly, the hippocampus was dissociated in papain. Neurons were seeded at a density of 150,000 on 18mm glass coverslips in 12 well plates or at 3,000,000 on 6cm dishes coated with poly-D-Lysine. Cells were maintained at 37°C, 5% CO<sub>2</sub> for 14–18 days before being used for experiments. Neurons were cultured in Neurobasal media (GIBCO) supplemented with B27 (GIBCO) and 2 mM Glutamax. Half of the neuronal media was replaced with fresh media and anti-mitotics at DIV 5, followed by a subsequent media change at DIV12.

## METHOD DETAILS

### DNA constructs

pEGFP-FUGW was used as a GFP cell fill to distinguish between soma and dendrites in imaging experiments using anti-miRs, Puro-PLA and FISH. pAAV-miR-GFP control (containing a scrambled miRNA sequence) and pAAV-miR376c-GFP vectors were obtained from ABM (See key resource table for further details). GFP-NFATc3 and GFP-NFATc4 were generated as described previously (Wild et al., 2019). Gephyrin-FingR-GFP was purchased from Addgene. The 3'UTRs of *GABRA1* and *GABRG2* were created as gene fragments by Twist Bioscience and cloned into the *SacI* and *MluI* restriction sites of pMIR-REPORT (See key resource table for full list of primers used for cloning). miR376c seed sites were mutated via site directed mutagenesis. The miR376c promoter was also created as a gene fragment by Twist Bioscience and cloned into the *SacI* and *HindIII* sites of the promoter-less pGL4.10 firefly luciferase construct (Promega). NFAT binding sites were introduced into miR376c<sup>Prom-WT</sup>-Luc via site directed mutagenesis.

### Drug treatments

Chemical iLTP was induced in DIV14–18 hippocampal neurons via bath application of 20 μM NMDA and 10 μM CNQX in HBS solution (145 mM NaCl, 2 mM KCl, 10 mM HEPES, 2 mM CaCl<sub>2</sub>, 2 mM MgCl<sub>2</sub>, 10 mM glucose, pH 7.4) for 2 min at 37°C as previously described (Petrini et al., 2014). Neurons were harvested or fixed at specific time points post-stimulation as stated in the figures and/or figure legends. Cycloheximide was supplemented into the bath media and conditioned media at 10 μg/ml and left in the culture media until the neurons were ready to be harvested or fixed. Cyclosporin A (Tocris), FK506 (Tocris) and TAT-CN21 (kind gift from Dr. Ulli Bayer) were used at 5 μM and added to cell culture media 15 minutes prior to iLTP induction and left in the culture media following stimulation until the neurons were ready to be harvested. Likewise, BAPTA-AM (Tocris) was used at 20 μM and Nimodipine at 10 μM. Neurons were treated with Trichostatin A (TSA) for 16 hours at 1 μM prior to iLTP induction.

### AAV production and infections

AAVs were produced as previously described (Aoto et al., 2013). Briefly, HEK293T cells (obtained from ATCC and maintained under standard conditions: 10% FBS in DMEM, 37°C, 5% CO<sub>2</sub>) were co-transfected with the pAAV vector and helper plasmids (pDJ and pHelper) using calcium phosphate transfection. 72 h post-transfection, HEK293T cells were harvested and subject to iodixanol gradient (15%, 25%, 40% and 60%) column ultracentrifugation (2 h at 63,500 rpm in a Beckman Type80Ti rotor). Viral particles in the 40% layer were purified through Amicon Ultra-15 columns (Millipore) into a volume of < 300 μl. Viral particles were aliquoted and stored at –80°C. Neurons were infected 4 days prior to experiments.

### Transfections

DIV 12–14 hippocampal neurons were transfected with plasmid DNA and/or miRDIAN miRNA inhibitors (Horizon; See key resource table for further information) using Lipofectamine 2000 (Invitrogen) and used for experiments at DIV 14–16.

### Immunofluorescence microscopy

For surface GABA<sub>A</sub>R $\gamma$ 2 and GluA1 staining, hippocampal neurons grown on coverslips were fixed in 4% paraformaldehyde supplemented with 4% sucrose in PBS at RT for 5 minutes. Next, the coverslips were incubated in blocking solution (3% BSA, 2% normal goat serum in PBS) for 1 hour at RT and surface stained for GABA<sub>A</sub>R $\gamma$ 2 (1:500 Synaptic Systems 224004) or GluA1 (1:200 Millipore ABN241) in blocking solution for 1 hour at RT. Following 3 times 5 minute washes in PBS, the coverslips were incubated for 45 minutes with the appropriate secondary antibodies (1:2000 ThermoFisher Alexa- Fluor 488, 568, 647) before being mounted onto microscope slides using ProLong gold mounting media (ThermoFisher). When necessary, neurons were permeabilized in 0.5% NP-40 for 2 minutes and blocked for 40 minutes prior to Gephyrin (1:500 Synaptic Systems 147011) or VGAT staining (1:1000 Synaptic systems 131003) in blocking solution for 1 hour at RT. Widefield images were acquired using an Axiovert200M microscope (Carl Zeiss) with a 63X plan-*apo*/1.4 numerical aperture oil objective, 300W Xenon illumination (Sutter Instruments), Coolsnap-HQ2 charge-coupled device (CCD) camera, and Slidebook 6.0. Confocal images were acquired using a Zeiss Observer.Z1 inverted microscope equipped with a Yokogawa CSU-X1 spinning disk unit; an EC Plan- Neofluar 40x (1.30 NA) oil immersion objective lens; a Photometrics PVCAM (Dynamic) EMCCD camera with 16-bit dynamic range; and SlideBook 6.0 software. Images were acquired using 2  $\mu$ m Z stacks of xy planes at 0.2  $\mu$ m intervals. For widefield images, planes were deblurred using nearest neighbor deconvolution and maximum intensity projected into 2D images. The cluster area and density of surface receptors, gephyrin and VGAT were analyzed in ImageJ on randomly selected dendrites. Cluster analysis was analyzed based on a minimum cluster area threshold of 0.8  $\mu$ m<sup>2</sup>. At least three independent experiments were performed, and statistical significance was determined using either t tests or ANOVA, as appropriate.

### Fluorescent *in situ* hybridization (FISH)

RNA FISH was performed using the miRCURY LNA miRNA ISH kit (Exiqon/Qaigen) and double labeled 5' and 3' digoxigenin probes designed by Exiqon/Qaigen (See key resource table for LNA FISH sequences; a control sequence probe was included with the ISH kit). PFA fixed neurons on coverslips were treated with Proteinase K for 2 minutes at 37°C followed by 3 stringent washes in PBS. 10  $\mu$ M stock probes were heat denatured at 94°C for 4 minutes and 1  $\mu$ L of denatured stock was diluted in 999  $\mu$ L of 1x hybridization buffer and incubated with the neurons at 62°C for 1 hour. The coverslips were then stringently washed at 62°C in 5x saline-sodium citrate (SSC) for 5 minutes, 2 times 1x SSC for 5 minutes each and 2 times 0.2x SSC for 5 minutes each. The coverslips were finally washed in 0.2x SSC for 5 minutes at RT and were then subject to the IF protocol described above. FISH probes were detected with anti-digoxigenin antibody (1:200 Jackson ImmunoResearch 200-002-156). Mean fluorescence signals in the soma and dendrites were determined by ImageJ. At least three independent experiments were performed, and statistical significance was determined using either t tests or ANOVA, as appropriate.

### Puromycin-Proximity Ligation Assays (Puro-PLA)

Neurons were treated with 1  $\mu$ M puromycin for 10 minutes prior to fixation in 4% PFA for 5 minutes. Puro-PLA was performed using the Duolink *in situ* red PLA mouse/rabbit kit (Sigma) as previously described (Rajgor et al., 2018). Anti-puromycin (Kerafast 3RH11) and anti-GABA<sub>A</sub>R $\alpha$ 1 (Synaptic systems 224203) were used at 1:500. The number of PLA positive puncta in dendrites per 10  $\mu$ m and number of puncta per  $\mu$ m<sup>2</sup> area of somatic space was quantified in ImageJ by puncta counting or integrated density as shown in Figure 5. At least three independent experiments were performed, and statistical significance was determined using ANOVA.

### Live Imaging

Hippocampal neurons expressing GFP-NFATc3 were imaged pre-stimulation and 10 minutes post-iLTP induction. Live imaging was performed on a Zeiss Observer.Z1 inverted microscope equipped with a Yokogawa CSU-X1 spinning disk unit; an EC Plan- Neofluar 40x (1.30 NA) oil immersion objective lens; a Photometrics PVCAM (Dynamic) EMCCD camera with 16-bit dynamic range; and Slide-Book 6.0 software. Images were acquired using 2  $\mu$ m Z stacks of xy planes at 0.2  $\mu$ m intervals. Nuclear GFP-NFATc3 levels were normalized to cytoplasmic levels in ImageJ. Five independent experiments were performed, and statistical significance was determined using paired t tests.

### Whole cell electrophysiology

DIV 14–16 pyramidal hippocampal neurons were held at  $-70$  mV and recorded from using an intracellular solution containing: 130mM cesium methanesulfonate, 3mM Na<sub>2</sub>ATP, 0.5mM Na<sub>3</sub>GTP, 0.5mM EGTA, 10mM phosphocreatine, 5mM MgCl<sub>2</sub>, 2.5mM NaCl, 10mM HEPES (290–300 mOsm) and extracellular solution containing: 130mM NaCl, 5mM KCl, 2mM CaCl<sub>2</sub>, 1mM MgCl<sub>2</sub>, 10mM HEPES, 20mM Glucose (pH 7.4). mIPSCs were isolated using 10  $\mu$ M NBQX and 0.5  $\mu$ M TTX (Tocris) and mEPSCs were isolated using 50  $\mu$ M picrotoxin (Tocris) and 0.5  $\mu$ M TTX extracellularly. For the iLTP experiments, mIPSCs were recorded for  $\sim$ 4 minutes under basal conditions from multiple different GFP-expressing neurons and the average amplitude and frequency were used as 'control values'. For the iLTP condition, neurons were stimulated and 20 minutes later, mIPSCs were recorded for a 60 min time-period

from different infected pyramidal neurons in the same experimental culture. mIPSC parameters were steady state throughout this phase of iLTP and the average amplitude and frequencies across the recording window were used as 'iLTP' values. Data were collected using a Digidata 1440A with Axopatch 200B amplifier (Molecular Devices). All data were acquired with pCLAMP software and analyzed in Clampfit 10. A template for the detection of clean and stable mIPSC traces was created in Clampfit10. All traces were manually reviewed prior to analysis. The majority of events were  $> 5$  pA. The decay and rise times were calculated at 10%–90% of the event. The charge transfer was calculated as the readout of area from Clampfit10 which was in pA per ms. At least three independent experiments were performed, and statistical significance was determined using either t tests or ANOVA, as appropriate. All error bars on graphs represent standard error of the mean.

### RNA isolation and qRT-PCR

RNA was isolated from neurons using the RNeasy mini kit (QIAGEN) according to the manufacturer's instructions. mRNA and miRNA were reverse transcribed into cDNA using miScript II RT kit (QIAGEN) according to the manufacturer instructions. cDNA was diluted 1/10 in RNAase free water and 1  $\mu$ L was used per qPCR reaction when measuring mRNA and mature miRNA levels. 1  $\mu$ L of undiluted cDNA was used when measuring levels of pri-miRNAs. qPCR was performed using gene specific primers or miRNA specific primers with the universal primer provided with the miScript II RT kit in a Biorad CFX384 real time qPCR system. See key resource table for list of primers used for qPCR. All qPCR readings were normalized to the U6 snRNA which was used as a house keeping gene. qPCR primers for U6 snRNA were included with the miScript II RT kit (QIAGEN). Ago2 bound mRNAs were normalized to their respective inputs. qPCR cycling parameters were: 94°C 15min, 55°C 30sec, 70°C 30 s for 40 cycles. At least three independent experiments were performed, and statistical significance was determined using either t tests or ANOVA, as appropriate.

### Ago2 RNA-IP

Hippocampal neurons were lysed in 1ml lysis buffer (10mM HEPES pH7.4, 200mM NaCl, 30mM EDTA, 0.5% Triton X-100, 0.5 U/ $\mu$ l SUPERase inhibitor, 1x Complete Protease Inhibitor) and briefly sonicated for 10 s. Cells were left on ice for 10 minutes and the cell debris was pelleted by centrifugation at 13 000 rpm for 10 minutes at 4°C. 50 $\mu$ l was taken as protein input. The remaining lysate was pre-cleared with 100 $\mu$ l or Protein G Sepharose beads (Sigma) for 30 minutes at 4°C. The beads were pelleted and the remaining lysate was equally divided and incubated with 2  $\mu$ g of Pan-Ago (Millipore; 2A8) or IgG (Cell Signaling 5415) for 1 hour at 4°C. Antibody complexes were captured by incubating with beads for 1 hour at 4°C followed by 5 washes in 1 mL of lysis buffer. 1 quarter of the purified complex was boiled in protein loading buffer and Ago2 enrichment was analyzed by western blotting as described below. The remaining IP was subject to RNA isolation as described above. At least three independent experiments were performed, and statistical significance was determined using t tests.

### Western blotting

Whole-cell lysates were prepared by scraping cells in 2X protein loading buffer (4% SDS, 20% glycerol, 120mM Tris pH6.8, 0.02% bromophenol blue, 5% 2-mercaptoethanol) and boiling extracts at 95°C for 5 minutes. Proteins were resolved by SDS-PAGE and transferred to PVDF membrane using a wet transfer apparatus and blocked in 5% milk solution made up in PBS-Tween. The membranes were blotted with the appropriate primary antibody overnight at 4°C: Ago2 (1:1000 Millipore 2A8), GABA<sub>A</sub>R $\alpha$ 1 (1:1000 NeuroMab 75136), GABA<sub>A</sub>R $\alpha$ 5 (1:1000 NeuroMab 455510), GABA<sub>A</sub>R $\beta$ 3 (1:1000 NeuroMab 75149), GABA<sub>A</sub>R $\gamma$ 2 (1:1000 NeuroMab 75442), GAPDH (1:10 000 GeneTex 627408), Gephyrin (1:5000 Synaptic Systems 147111), GFP (1:2000 NeuroMab 75131), GluA1 (1:1000 Millipore ABN241), LIMK1 (1:1000 Cell Signaling 3842). Membranes were washed in PBS-Tween and incubated with the appropriate HRP conjugated secondary antibodies for 1 hour at RT (1:10 000 Millipore). Protein bands were visualized using ECL western blotting substrates (Millipore). Where appropriate, the membranes were stripped with stripping buffer and re-probed. For densitometry measurements, western blot images were analyzed in ImageJ. The integrated densities of bands of interest were normalized to GAPDH from the same gel. At least three independent experiments were performed, and statistical significance was determined using either t tests or ANOVA, as appropriate. All error bars on graphs represent standard error of the mean.

### Surface biotinylations

Surface biotinylations were performed as previously described (Smith et al., 2014). Briefly, DIV 14-16 hippocampal neurons were incubated on ice with biotin solution (Pierce Sulfo-NHS-LC-Biotin) at 0.5 mg/ml in PBS containing Ca<sup>2+</sup> and Mg<sup>2+</sup> and quenched with quench buffer (1 mg/ml BSA in PBS containing Ca<sup>2+</sup>/Mg<sup>2+</sup>). Neurons were solubilized for 1 hour in RIPA buffer (50 mM Tris pH 7.5, 1 mM EDTA, 2 mM EGTA, 150 mM NaCl, 1% NP40, 0.5% DOC, 0.1% SDS, 50mM NaF, and 1mM Na<sub>3</sub>VO<sub>4</sub>) and neuronal debris was pelleted from lysates by centrifugation at 12000 rpm for 15 minutes at 4°C. 15% of the supernatant was taken to use as a total protein input and the remainder was incubated for 2h with 25  $\mu$ L Ultralink immobilized Pierce NeutrAvidin 50% slurry at 4°C to precipitate biotin labeled membrane proteins. Beads were washed three times in RIPA buffer and analyzed by western blotting. Surface levels were normalized to their respective inputs. Statistical significance was determined using ANOVA.

### Luciferase assays

DIV12-14 hippocampal neurons or HEK293T cells plated in 12 well dishes were co-transfected with 500  $\mu$ g of the appropriate Firefly luciferase reporter construct and 500  $\mu$ g of Renilla. 500  $\mu$ g of GFP, GFP-NFATc3, GFP-NFATc4, miRCon or miR376c, or 1  $\mu$ L of stock



miRNA inhibitor were co-transfected when appropriate. The dual-luciferase reporter assay system (Promega) was used to perform the assays according to the manufacturer's instructions. Firefly values were normalized to Renilla values for each of at least 3 independent experiments, and statistical significance was determined by ANOVA.

#### **Acetyl-Histone H3 chromatin immunoprecipitation (ChIP)**

Acetyl-Histone H3 ChIP was performed using the EpiQuik Acetyl-Histone H3 ChIP kit (EpiGentek) according to the manufacturer's instructions. The eluted DNA from the IP was normalized to the input DNA using qPCR with a forward primer (5' TGGACAAGGGAGAGATGGA3') and reverse primer (5' ATGAAGAAGACGGCAGACAG3') targeting the putative miR376c promoter. At least three independent experiments were performed, and statistical significance was determined using ANOVA.

#### **QUANTIFICATION AND STATISTICAL ANALYSIS**

All statistical tests were performed in Prism7 (GraphPad) using t test or ANOVA, Bonferroni post hoc test. All experiments were performed at least 3 times to ensure rigour and reproducibility. The exact number of repeats and statistical details of experiments can be found in the figure legends. P values were considered significant if  $< 0.05$ . All graphs show SEM.

**Cell Reports, Volume 31**

**Supplemental Information**

**Local miRNA-Dependent Translational  
Control of GABA<sub>A</sub>R Synthesis  
during Inhibitory Long-Term Potentiation**

**Dipen Rajgor, Alicia M. Purkey, Jennifer L. Sanderson, Theresa M. Welle, Joshua D. Garcia, Mark L. Dell'Acqua, and Katharine R. Smith**

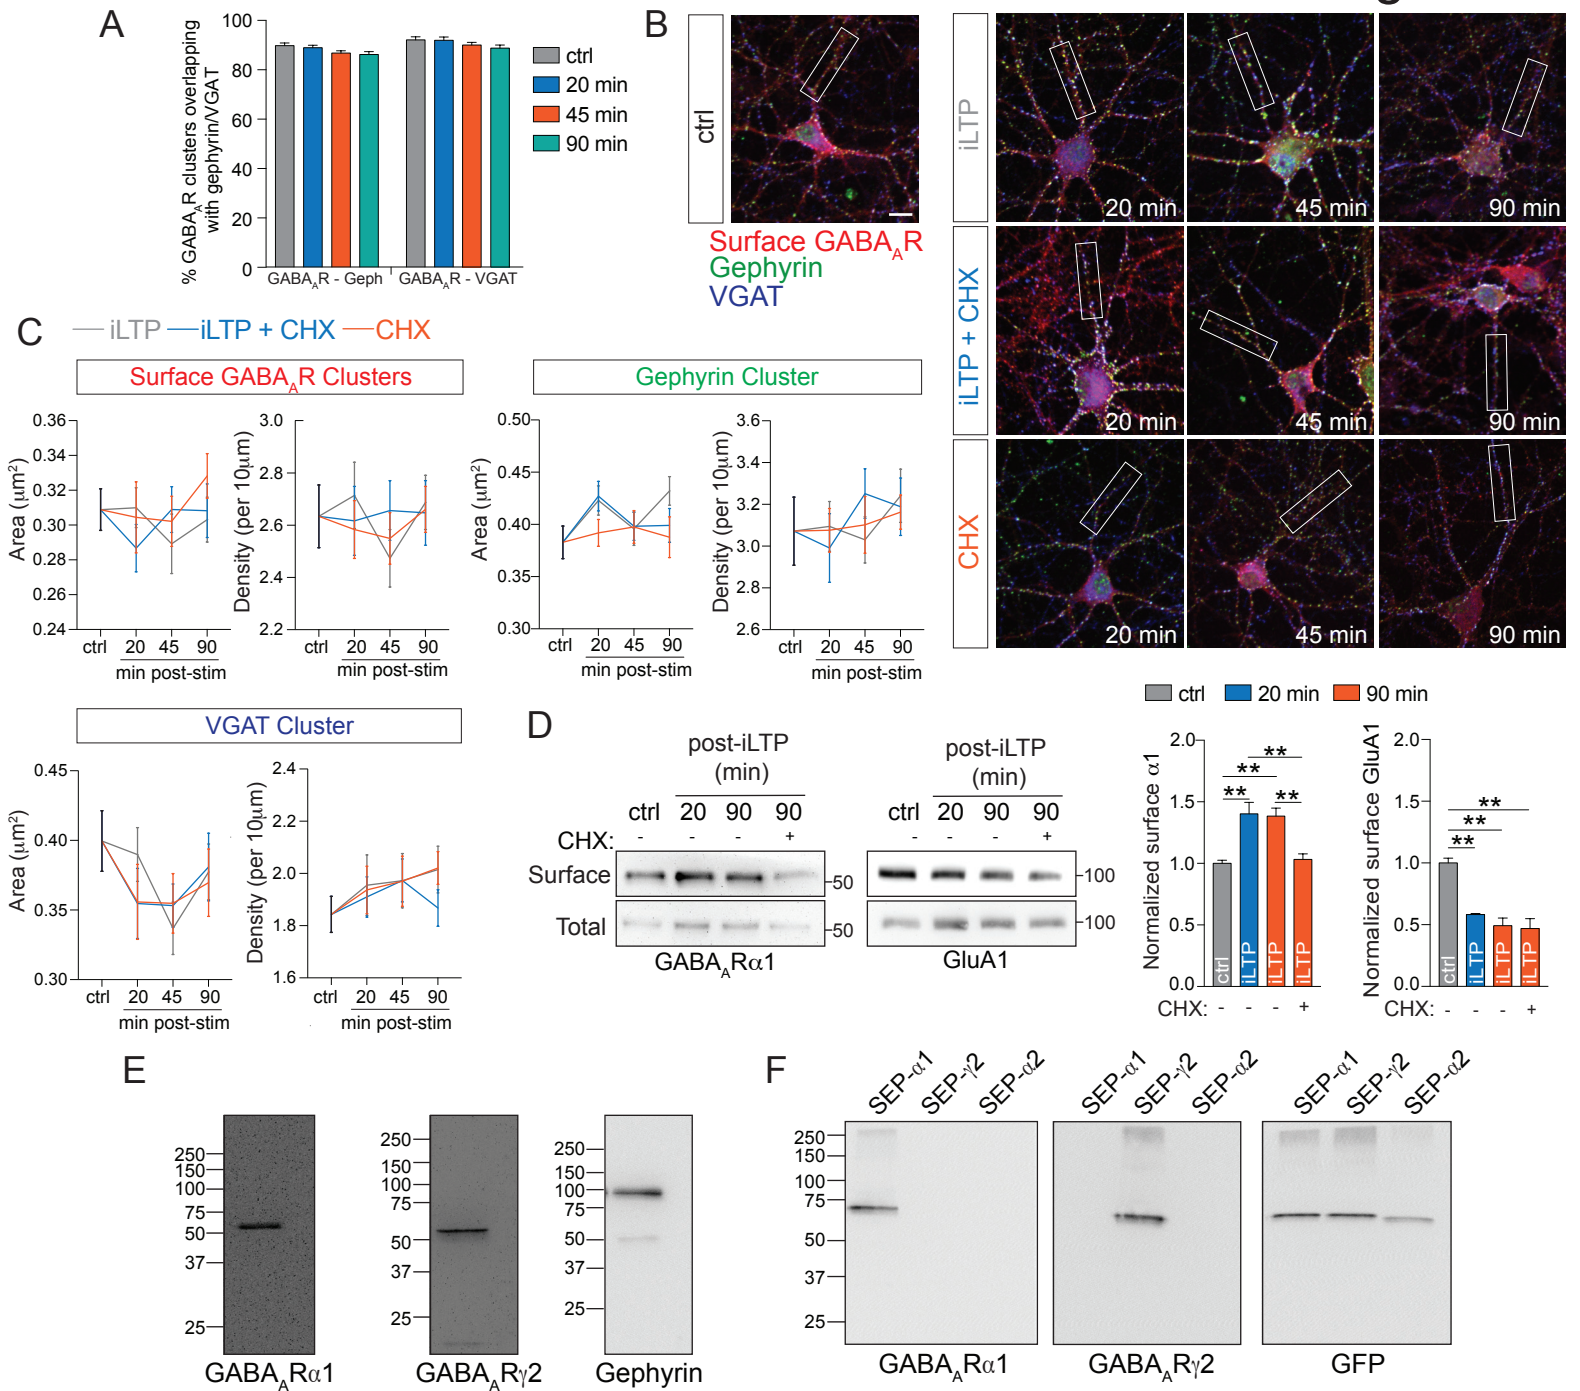

**Figure S1, related to Figure 1. Protein synthesis is required to maintain dendritic surface GABA<sub>A</sub>Rs following iLTP.** **A)** Percentage dendritic surface GABA<sub>A</sub>R<sub>γ2</sub> overlapping with gephyrin or VGAT in resting neurons and post-iLTP induction. Quantification based on images from Figure 1A, n=16 cells per condition from 3 independent experiments. **B)** Representative soma images labeled with surface GABA<sub>A</sub>R<sub>γ2</sub> and intracellular gephyrin and VGAT. Neurons were fixed at 20, 45 and 90 min post-treatment: iLTP induction, iLTP induction in the presence of cycloheximide (CHX), or CHX alone. Dendritic segments shown in Figure 1A are from the boxed white areas shown. Scale bar = 10 μm. **C)** Quantification of somatic surface GABA<sub>A</sub>R<sub>γ2</sub>, gephyrin and VGAT cluster area and density from B), n=15-16 cells per condition from 3 independent experiments. **D)** WBs and quantification of GABA<sub>A</sub>R<sub>α1</sub> and GluA1 from surface biotinylation assays following iLTP in the presence or absence of CHX. Surface levels were normalized to total levels, n=5. **E)** Full-length WBs showing anti-GABA<sub>A</sub>R<sub>α1</sub> and anti-GABA<sub>A</sub>R<sub>γ2</sub> recognize a single band at ~50 kDa from hippocampal neuronal lysates and anti-gephyrin recognizes a major band at ~100 kDa. Predicted molecular weights for α<sub>1</sub>, γ<sub>2</sub> and gephyrin are 52 kDa, 54 kDa and 84.4 kDa respectively. Gephyrin runs higher due to post-translational modifications. **F)** Lysates from HEK293T cells expressing SEP-tagged GABA<sub>A</sub>R<sub>α1</sub>, GABA<sub>A</sub>R<sub>γ2</sub> or GABA<sub>A</sub>R<sub>α2</sub> were probed with anti-GABA<sub>A</sub>R<sub>α1</sub>, anti-GABA<sub>A</sub>R<sub>γ2</sub> and anti-GFP antibodies. Anti-GABA<sub>A</sub>R<sub>α1</sub> only detects GABA<sub>A</sub>R<sub>α1</sub>. Anti-GABA<sub>A</sub>R<sub>γ2</sub> only detects GABA<sub>A</sub>R<sub>γ2</sub>. Anti-GFP detects all three subunits.

All values represent mean ± SEM. \*\*p < 0.01, by one-way ANOVA, Bonferroni post hoc test (A,D) or two-way ANOVA, Bonferroni post hoc test (C).

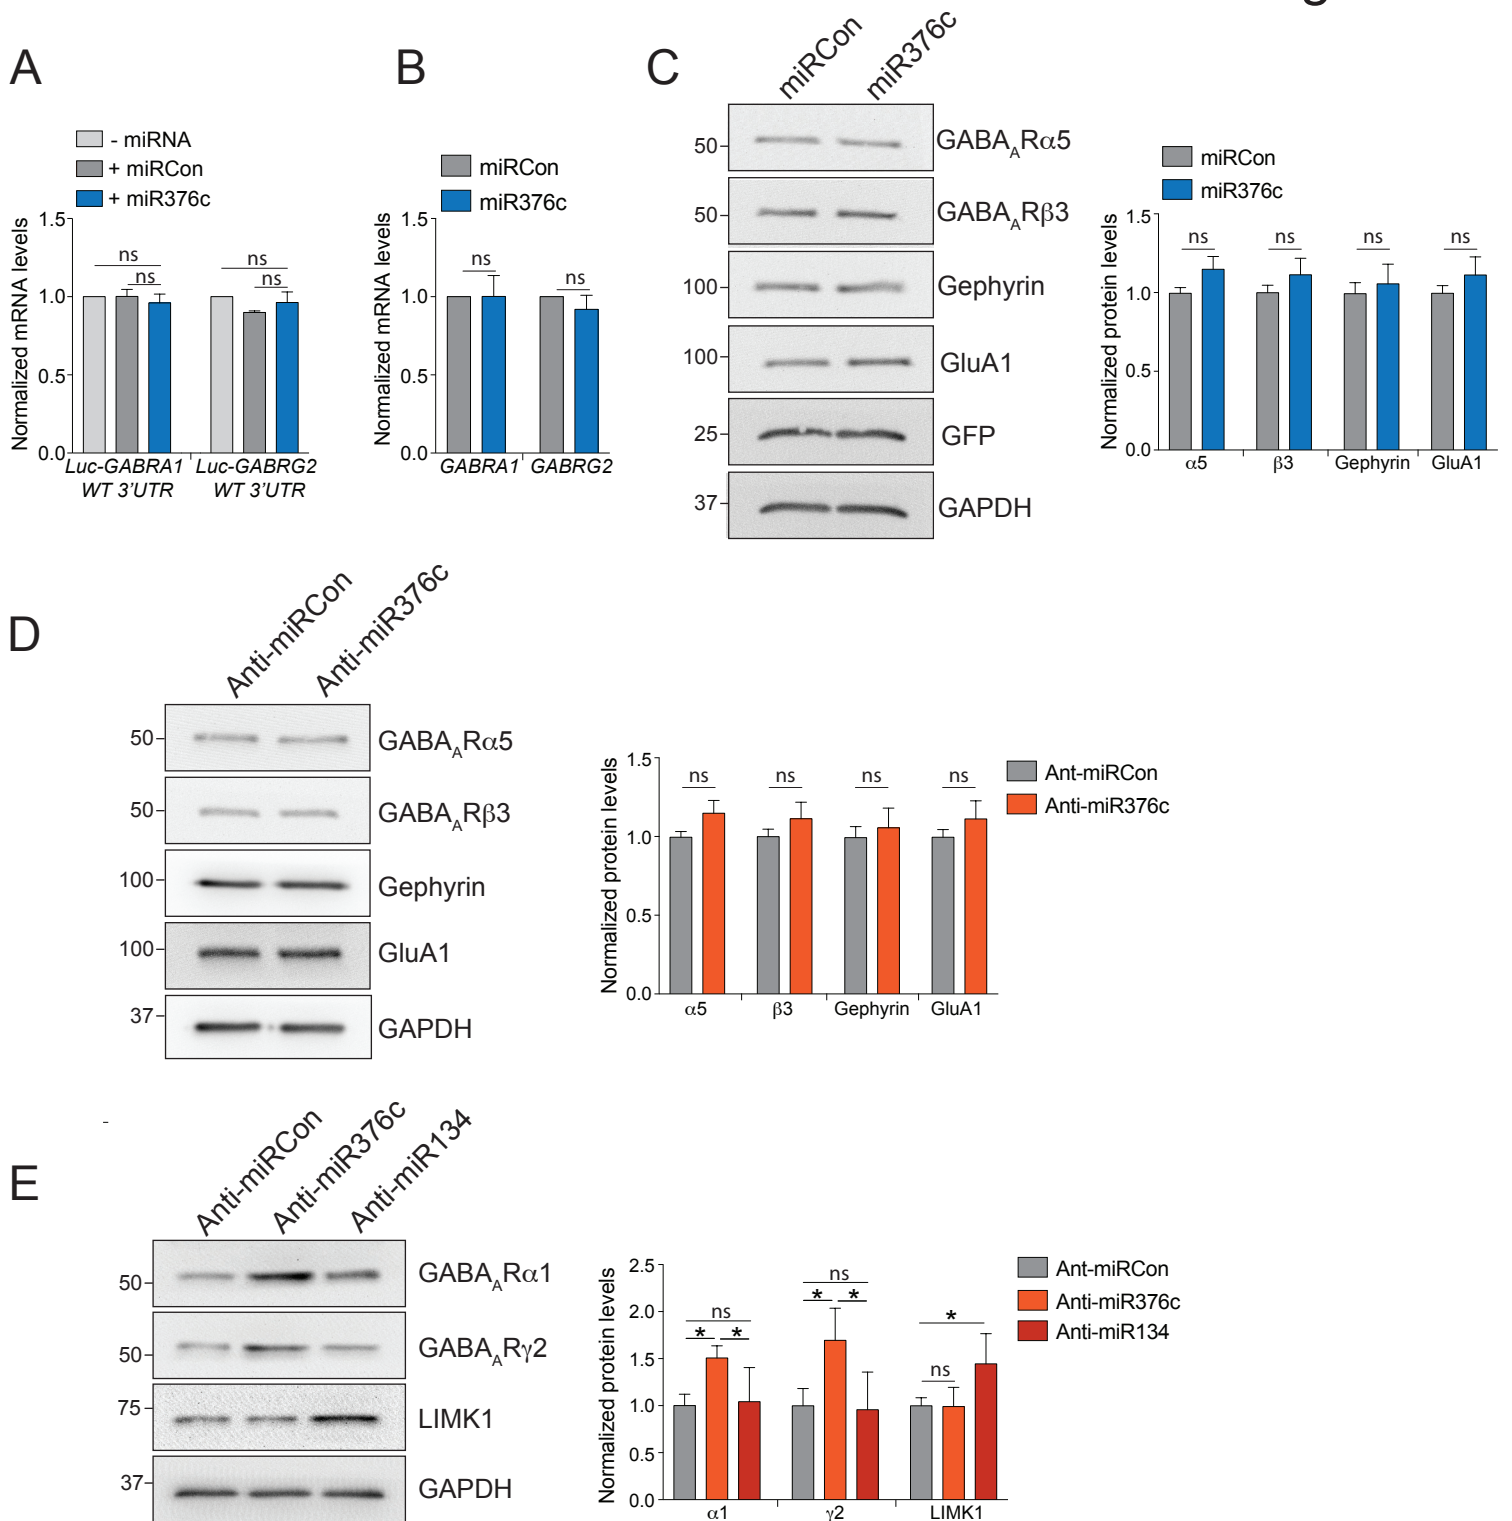

**Figure S2, related to Figure 2. miR376c specifically regulates translational repression of *GABRA1* and *GABRG2*.** **A)** qRT-PCR measuring mRNA levels of Luc-*GABRA1*<sup>WT</sup> and Luc-*GABRG2*<sup>WT</sup> from HEK-293T cells. All readings were normalized to Renilla levels, n=3. **B)** miR376c overexpression does not change *GABRA1* and *GABRG2* levels in hippocampal neurons. mRNA levels were normalized to snRNA U6, n=3. **C)** WBs showing miR376c overexpression does not change protein levels of GABA<sub>A</sub>Rα5, GABA<sub>A</sub>Rβ3, Gephyrin or GluA1 in hippocampal neurons. miRNA overexpression constructs contain a GFP reporter, which shows equal expression of miRCon and miR376c. GFP and GAPDH blots are the same blots as those used in Figure 2E. Protein levels were normalized to GAPDH, n=6. **D)** WBs showing that anti-miR376c does not change protein levels of GABA<sub>A</sub>Rα5, GABA<sub>A</sub>Rβ3, Gephyrin or GluA1 in hippocampal neurons. GAPDH blot is the same as used in Figure 2F. Protein levels were normalized to GAPDH. N=5. **E)** WBs showing that anti-miR134 does not change protein levels of GABA<sub>A</sub>Rα1 and GABA<sub>A</sub>Rγ2, and anti-miR376c does not change protein levels of LIMK1, n=4.

\*p<0.05, by one-way ANOVA, Bonferroni post hoc test. All values represent mean ± SEM. \*p < 0.05 by T-test (B,C,D) or one-way ANOVA, Bonferroni post hoc test (A,E).

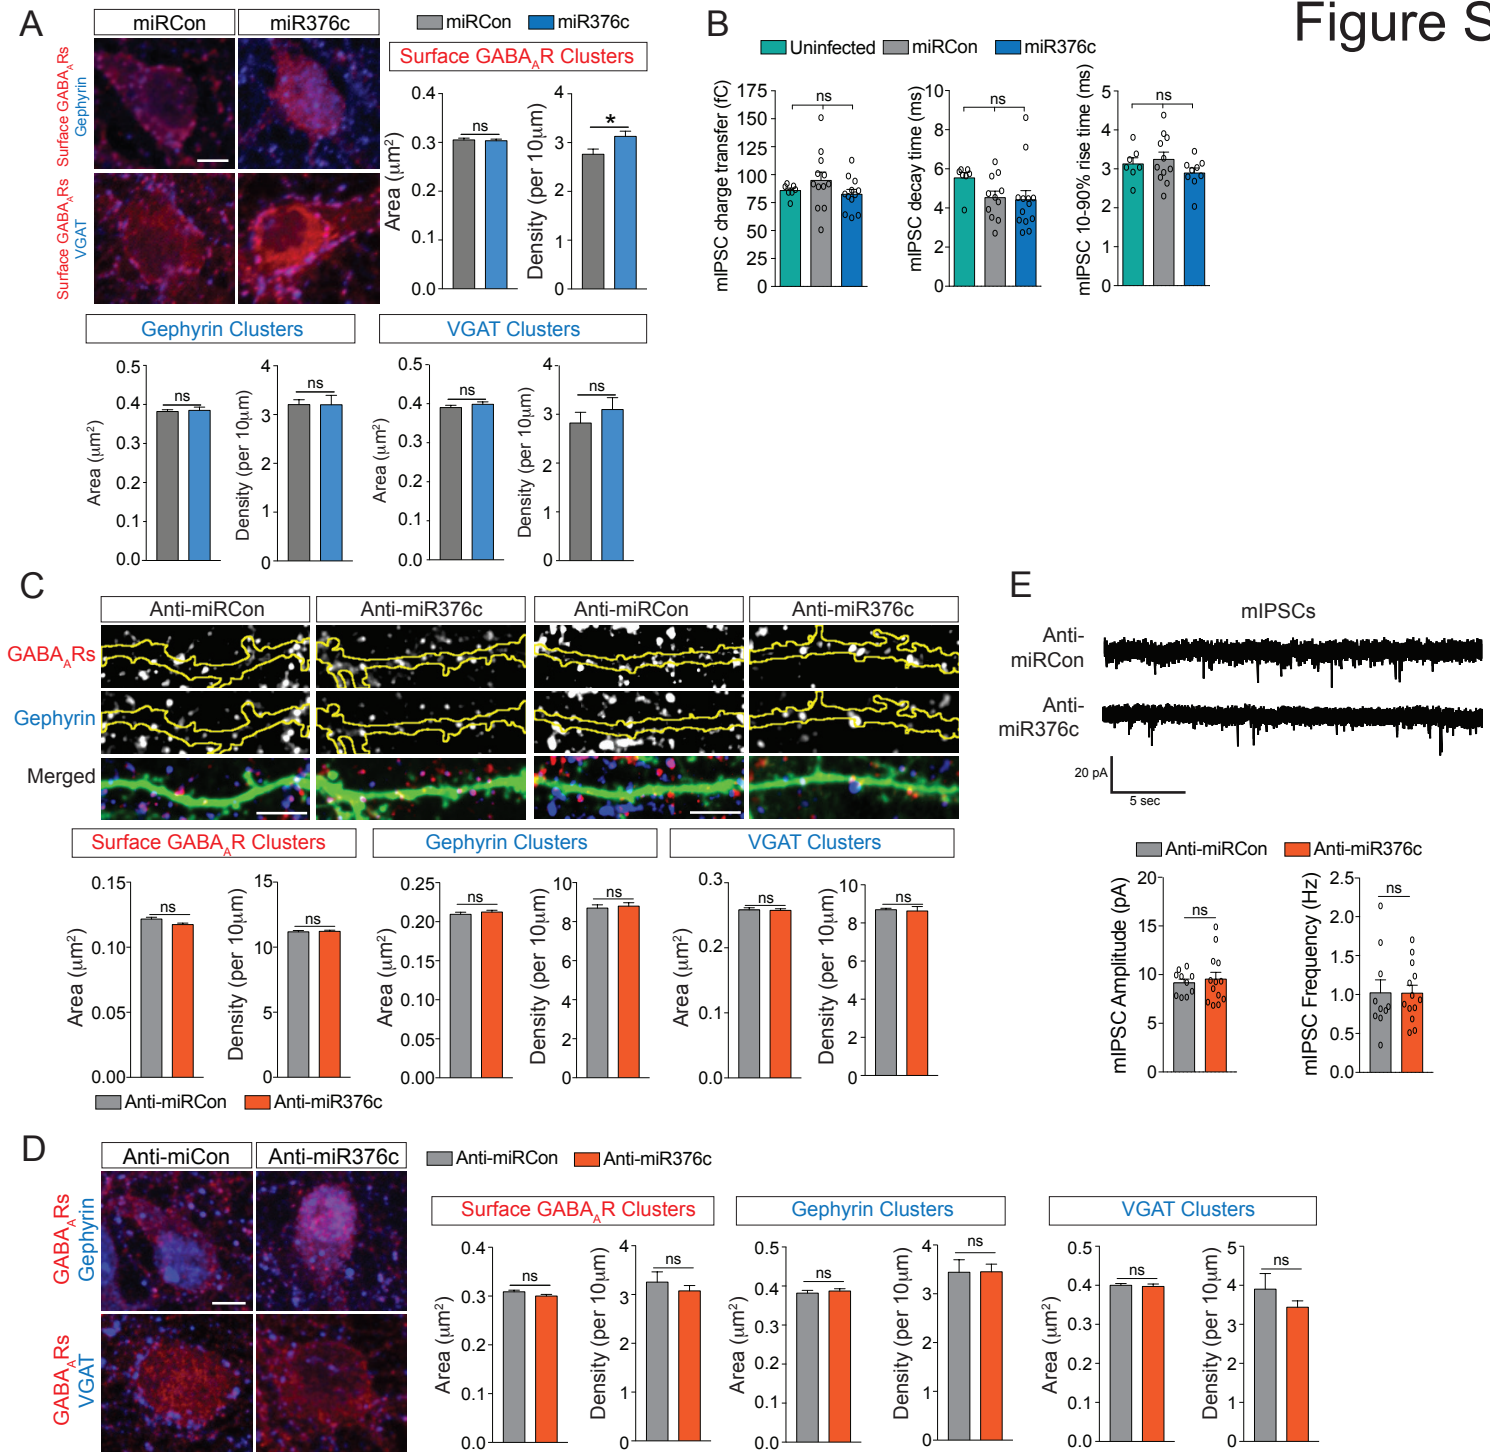

**Figure S3, related to Figure 3. miR376c does not influence clustering of somatic GABA<sub>A</sub>Rs.** **A)** Representative soma images from neurons expressing miRCon or miR376c labeled with surface GABA<sub>A</sub>R<sub>2</sub> and gephyrin or GABA<sub>A</sub>R<sub>2</sub> and VGAT. GFP is not shown to aid visualization of somatic clusters. Graphs show quantification of GABA<sub>A</sub>R<sub>2</sub>, gephyrin and VGAT cluster area and density, n=7-18 neurons per condition from 3 independent experiments. Scale bar=5µm. **B)** Quantification of mIPSC charge transfer, decay time and 10-90% rise time from uninfected neurons or neurons overexpressing miRCon or miR376c, n=7-12 cells from 3 independent experiments. **C)** Representative dendritic images from neurons transfected with anti-miRCon or anti-miR376c labeled with surface GABA<sub>A</sub>R<sub>2</sub> and intracellular gephyrin or GABA<sub>A</sub>R<sub>2</sub> and VGAT. Yellow outlines are constructed from GFP fill. Graphs show quantification of GABA<sub>A</sub>R<sub>2</sub>, gephyrin and VGAT cluster area and density, n=9-18 neurons per condition from 3 independent experiments. Scale bar = 5µm. **D)** Representative soma images from neurons expressing anti-miRCon or anti-miR376c labeled with surface GABA<sub>A</sub>R<sub>2</sub> and intracellular gephyrin or GABA<sub>A</sub>R<sub>2</sub> and VGAT. GFP is not shown to aid visualization of somatic clusters. Graphs show quantification of GABA<sub>A</sub>R<sub>2</sub>, gephyrin and VGAT cluster area and density, n=9-18 neurons per condition from 3 independent experiments. Scale bar=5µm. **E)** Representative mIPSC traces from neurons expressing anti-miRCon or anti-miR376c. Graphs show quantified mIPSC amplitude and frequency, n=10-13 cells from 3 independent experiments. All values represent mean ± SEM. Statistical significance determined by t-test (A,C,D,E) or one-way ANOVA, Bonferoni *post hoc* test (B).

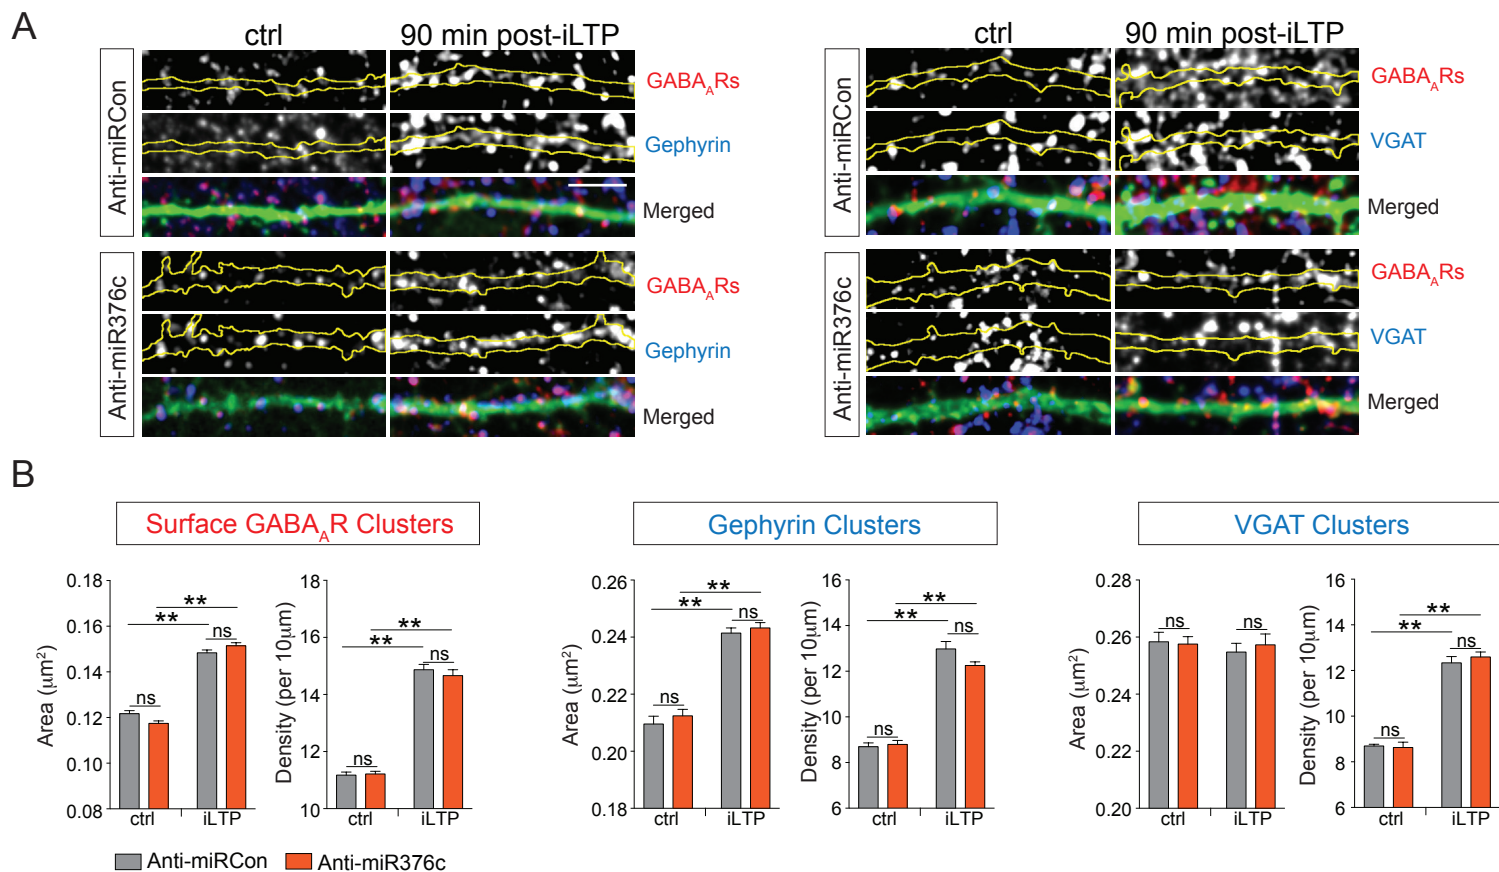

**Figure S4, related to Figure 4. miR376c inhibition does not occlude the upregulation of synaptic GABA<sub>A</sub>Rs following iLTP stimulation.**

**A)** Representative dendritic images from resting and iLTP induced (90 min) neurons expressing anti-miRCon or anti-miR376c, labeled with surface GABA<sub>A</sub>R $\gamma$ 2 and intracellular gephyrin or GABA<sub>A</sub>R $\gamma$ 2 and VGAT. Yellow outlines are constructed from GFP fill. Scale bar = 5  $\mu$ m.

**B)** Graphs show quantification of GABA<sub>A</sub>R $\gamma$ 2, gephyrin and VGAT cluster area and density. n=9-18 neurons per condition from 3 independent experiments. All values represent mean  $\pm$  SEM. \*\*p < 0.01, by two-way ANOVA, Bonferroni *post hoc* test.

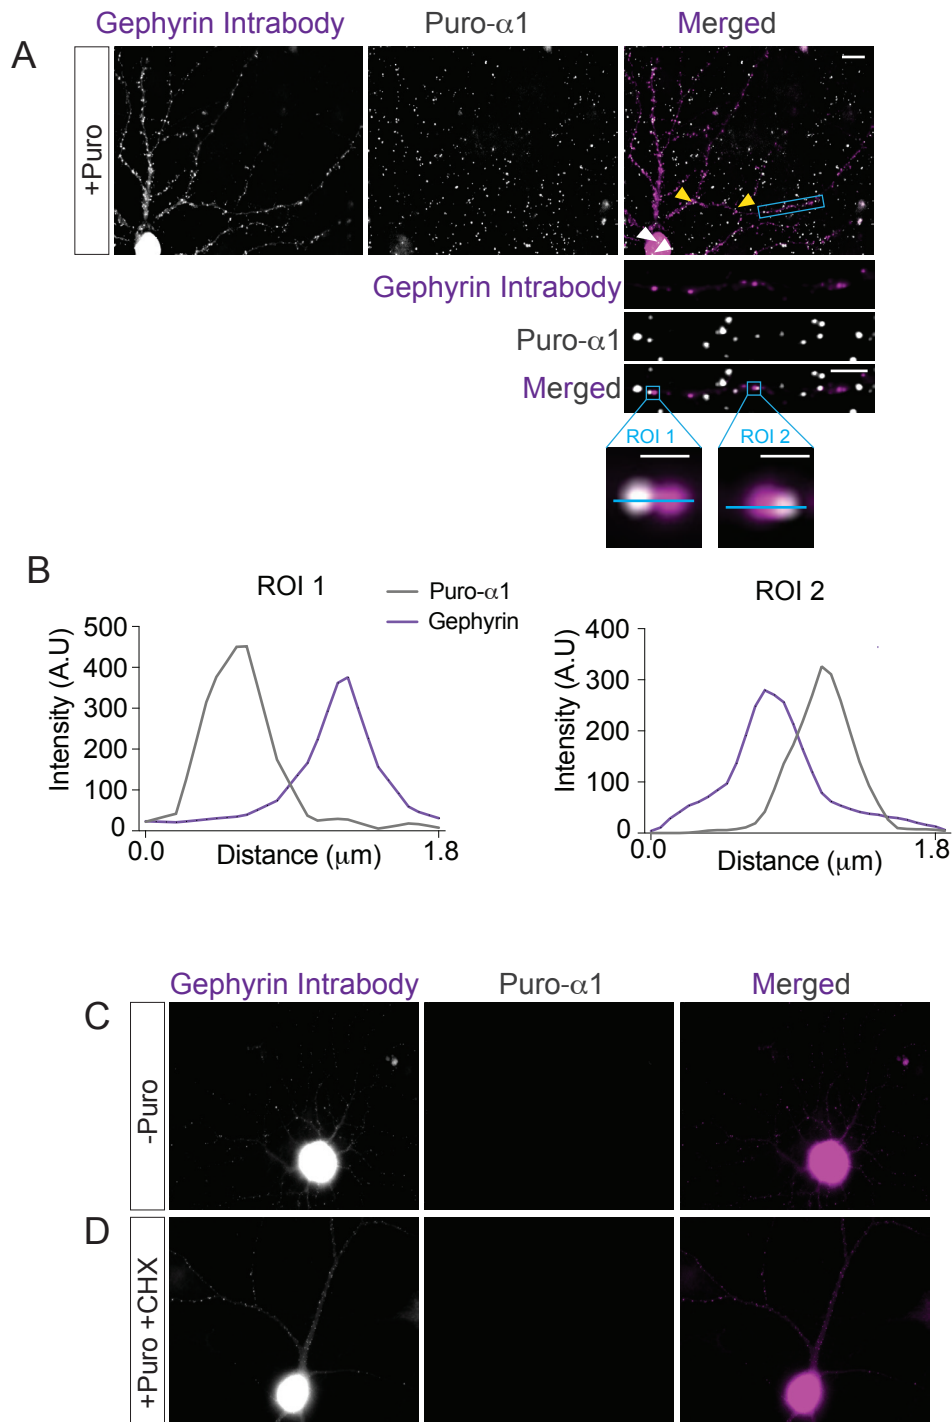

**Figure S5, related to Figure 5. *De novo* synthesis of GABA<sub>A</sub>R $\alpha$ 1 occurs at sites close to inhibitory synapses**

**A)** Puromycin-proximity ligation assay (Puro-PLA) for GABA<sub>A</sub>R $\alpha$ 1 performed in the presence of puromycin. Nascent GABA<sub>A</sub>R $\alpha$ 1 (Puro- $\alpha$ 1) in the soma (white arrow heads) and dendrites (yellow arrowheads) of hippocampal neurons. Puro- $\alpha$ 1 puncta not within the cell-fill is labeling from neurons not transfected with the gephyrin intrabody. Neurons were fed with 1 $\mu$ M of puromycin for 10 minutes prior to fixation. Dendritic enlargement of boxed area in the merged image is shown. Scale bar = 10 $\mu$ m for the whole cell image, 5 $\mu$ m for dendritic enlargement, 1 $\mu$ m for ROIs.

**B)** Line-scan analysis from 2 regions of interest (ROIs) marked show puro- $\alpha$ 1 adjacent to gephyrin labeled inhibitory synapses.

**C)** Puro-PLA for GABA<sub>A</sub>R $\alpha$ 1 performed in the absence of puromycin.

**D)** Puro-PLA for GABA<sub>A</sub>R $\alpha$ 1 performed in the presence of puromycin and cycloheximide (CHX).

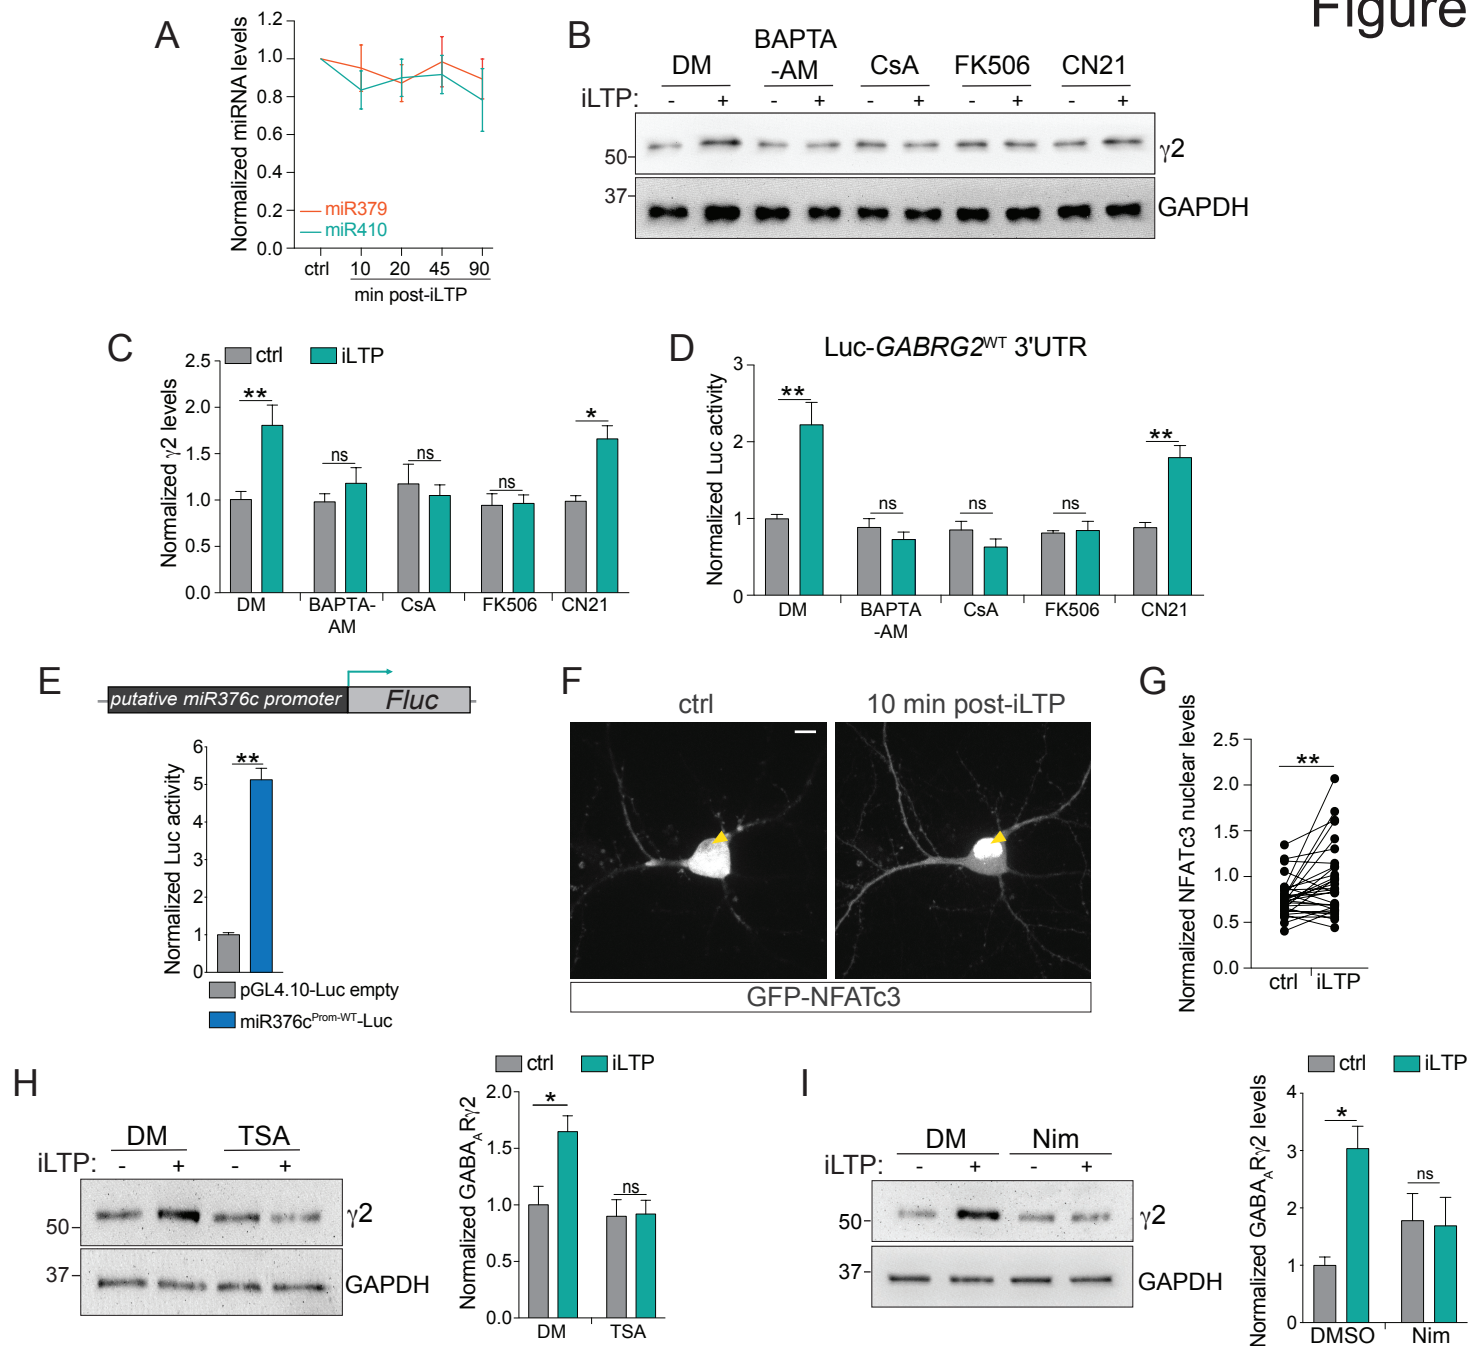

**Figure S6, related to Figure 7. L-type  $\text{Ca}^{2+}$  channels, calcineurin and NFATc3 signaling is involved in promoting *de novo* synthesis of GABA<sub>A</sub>R subunits  $\alpha 1$  and  $\gamma 2$  following iLTP. A)** qRT-PCR showing expression levels of mature miR379 and miR410 do not change following iLTP. miRNA levels were normalized to U6 snRNA,  $n=5$ . **B)** WBs showing levels of GABA<sub>A</sub>R $\gamma 2$  from resting neurons (ctrl) and from neurons 90 min post-iLTP-induction in the presence of DMSO (DM), BAPTA-AM, CsA, FK506 or TAT-CN21 (CN21). GAPDH blot is the same as Fig. 7C. **C)** Quantification of  $\gamma 2$  protein levels from B),  $n=6$ . **D)** Luciferase reporter readings of Luc-GABRG2 WT in resting neurons or in neurons 90 min post-iLTP-induction in the presence of DMSO (DM), BAPTA-AM, CsA, FK506 or TAT-CN21 (CN21),  $n=5$ . **E)** Luciferase assay showing the putative miR376c promoter (miR376cProm-WT-Luc) has significantly greater luciferase activity compared to a promoter-less empty luciferase reporter construct (pGL4.10-Luc empty). The putative miR376c promoter is the first 500bp of genomic sequence upstream of the pre-miR376c coding sequence. **F)** Live imaging showing GFP-NFATc3 translocates to the nucleus (yellow arrow heads) within 10 min of iLTP induction in hippocampal neurons. Scale bar =  $10\mu\text{m}$ . **G)** Quantification of nuclear GFP-NFATc3 levels. Nuclear expression was normalized to somatic expression. Scale bar =  $10\mu\text{m}$ ,  $n=40$  neurons from 5 independent experiments. **H)** WBs and quantification showing levels of GABA<sub>A</sub>R $\gamma 2$  from resting neurons (ctrl) or from neurons 90 min post-iLTP-induction in the presence of DMSO (DM) or Trichostatin A (TSA),  $n=6$ . GAPDH blot is the same as Fig. 7O. **I)** WBs and quantification showing L-type  $\text{Ca}^{2+}$  channel blockade with Nimodipine (Nim;  $10\mu\text{m}$ ) inhibits the iLTP-induced upregulation of GABA<sub>A</sub>R $\gamma 2$ . GABA<sub>A</sub>R $\gamma 2$  protein levels were normalized to GAPDH levels,  $n=3$ . GAPDH blot is the same as Fig. 7Q.

All values represent mean  $\pm$  SEM. \* $p < 0.05$  and \*\* $p < 0.01$ , by T-test (E,G), one-way ANOVA, Bonferroni *post hoc* test (A) or two-way ANOVA, Bonferroni *post hoc* test (C,D,H,I).



Figure S7

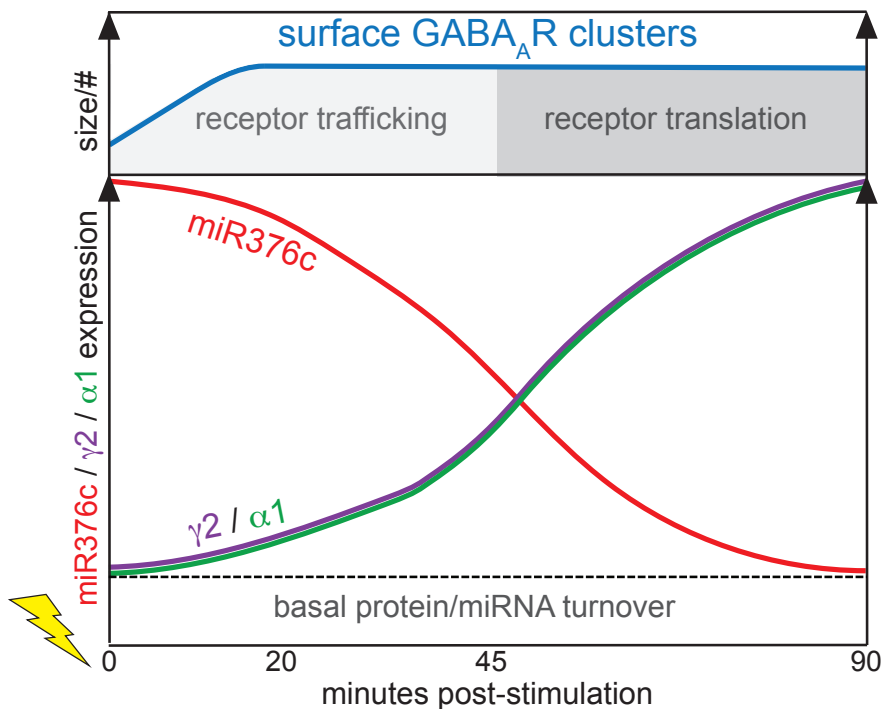

**Figure S7, related to Figures 1 and 4. miR376c reduction parallels increased *de novo* synthesis of synaptic GABA<sub>A</sub>R subunits following NMDAR activation.**

Following NMDAR-mediated iLTP stimulation, pre-existing assembled GABA<sub>A</sub>Rs are forward trafficked to the synapse to increase inhibitory synaptic strength (Marsden *et al.*, 2007, Petrini *et al.*, 2014). Maximal steady-state surface expression of GABA<sub>A</sub>Rs is achieved within the first 20 min of stimulation. During this time-frame, transcriptional-repression of the miR376c gene leads to a reduction in mature functional miR376c over time. This leads to an increase in *de novo* protein synthesis of  $\alpha$ 1 and  $\gamma$ 2 GABA<sub>A</sub>R subunits in dendrites, which assemble into functional synaptic GABA<sub>A</sub>Rs that can be incorporated into synapses, thereby maintaining potentiated GABAergic synapses.
